# Supplementary material for: Reevaluation of Parasynechococcus-like Strains and Genomic Analysis of Their Microsatellites and Compound Microsatellites
Source: MDPI journal article supplement (doi:10.3390/plants11081060), 2022-04-13
Supplement: s1 [file Suppl Tables_20220227.xlsx]

## Sheet: Table S1
Table S1 Detailed genome information regarding 80 Synechococcus-like strains used in this study
Strain	Accession No.	Size (Mb)	GC (%)	Completeness (%)	Contamination (%)
Synechococcus sp. RS9907	GCA_014279615	2.58163	60.36	99.73	0.27
Synechococcus sp. RS9902	GCA_014279635	2.48122	59.77	100	0.27
Synechococcus sp. N26	GCA_900473975	2.1269	60.68	100	0
Synechococcus sp. M16.1	GCA_014279895	2.11224	61.36	99.46	0
Synechococcus sp. A15-44	GCA_014280115	2.62196	60.79	99.82	0.54
Synechococcus sp. A15-62	GCA_014280075	2.29414	59.91	100	0
Parasynechococcus sp. WH 8109	GCA_000161795	2.11151	60.09	99.46	0
Synechococcus sp. UW86	GCA_900474085	2.09129	61.28	99.73	0
Synechococcus sp. MU1617	GCA_020514235	2.32659	59.89	99.73	0
Parasynechococcus sp. CC9902	GCA_000012505	2.23483	54.16	99.46	0
Parasynechococcus sp. BL107	GCA_000153805	2.71083	54.98	99.73	0
Synechococcus sp. UW69	GCA_900474185	2.37212	58.69	100	0
Synechococcus sp. MU1611	GCA_020514255	2.33943	58.56	99.73	0
Synechococcus sp. PROS-U-1	GCA_014279755	2.576	58.38	99.46	0.14
Synechococcus sp. KORDI-52	GCA_000737595	2.57207	59.09	100	0
Parasynechococcus marenigrum WH8102	GCA_000195975	2.43443	59.41	99.46	0
Synechococcus sp. A15-24	GCA_014280195	2.30537	59.64	99.73	0
Synechococcus sp. A18-46.1	GCA_014280015	2.47177	59.31	99.46	0
Synechococcus sp. A15-28	GCA_014280175	2.34159	60.13	99.73	0
Synechococcus sp. BOUM118	GCA_014279915	2.32633	59.78	99.46	0
Synechococcus sp. YX04-3	GCA_003712085	2.45968	59.31	99.46	0
Synechococcus sp. A18-40	GCA_014280055	2.40155	59.51	97.47	0
Synechococcus sp. WH 8103	GCA_001182765	2.42969	59.47	99.73	0.27
Synechococcus sp. RS9915	GCA_014279575	2.41798	59.5	99.18	0
Synechococcus sp. A15-127	GCA_014280215	2.54346	60.62	99.18	0.27
Synechococcus sp. KORDI-49	GCA_000737575	2.58581	61.37	99.37	0
Synechococcus sp. BS55D	GCA_004332415	2.23522	61.61	99.18	0.27
Synechococcus sp. BS56D	GCA_004332405	2.30382	61.23	99.46	0.54
Synechococcus sp. HK01-R	GCA_014217855	2.47925	61.21	99.46	0
Synechococcus sp. RS9909	GCA_014279595	2.60317	64.44	100	0
Synechococcus sp. WH 8101	GCA_014304795	2.62302	63.35	100	0.82
Synechococcus sp. UW105	GCA_900473935	2.65942	57.5	99.46	0
Synechococcus sp. UW140	GCA_900474295	2.70414	57.8	99.73	0
Parasynechococcus sp. CC9311	GCA_000014585	2.60675	52.45	99.73	0
Synechococcus sp. WH 8020	GCA_001040845	2.66117	53.14	99.73	0.27
Synechococcus sp. PROS-9-1	GCA_014279775	2.27394	53.89	99.32	0
Synechococcus sp. MVIR-18-1	GCA_014279835	2.45197	53.43	99.32	0
Synechococcus sp. SYN20	GCA_014279555	2.72863	53.42	92.39	0.54
Synechococcus sp. ROS8604	GCA_014279655	2.8769	53.96	99.46	0
Parasynechococcus sp. WH 8016	GCA_000230675	2.69484	54.09	99.18	0
Synechococcus sp. NOUM97013	GCA_014279815	2.55271	58.82	99.46	0.23
Synechococcus sp. A18-25c	GCA_014280035	2.51136	58.15	99.73	0.14
Synechococcus sp. A15-60	GCA_014280095	2.5434	58.22	99.73	0.41
Synechococcus sp. PROS-7-1	GCA_014279795	1.67981	57.28	92.26	0.36
Synechococcus sp. MEDNS5	GCA_014279875	2.43587	59.09	99.18	0
Parasynechococcus sp. WH 7803	GCA_000063505	2.36698	60.24	99.18	0
Synechococcus sp. BMK-MC-1	GCA_014279955	2.60115	60.36	98.91	0.54
Synechococcus sp. MIT S9504	GCA_001632105	3.08729	55.43	99.73	1.09
Synechococcus sp. MIT S9509	GCA_001631935	3.08793	55.42	99.18	0.82
Synechococcus sp. BIOS-E4-1	GCA_014279995	3.31422	55.12	100	0.82
Synechococcus sp. UW179A	GCA_900473965	3.05783	54.5	100	0.41
Synechococcus sp. GEYO	GCA_900473955	2.34361	56.51	99.46	0
Synechococcus sp. MIT S9220	GCA_014304815	2.42417	56.37	99.73	0.27
Synechococcus sp. MIT S9508	GCA_001632165	2.50243	56.05	100	0.27
Synechococcus sp. CC9616	GCA_000515235	2645910	56.55	99.46	0.27
Synechococcus sp. KORDI-100	GCA_000737535	2789000	57.5	99.46	0
Synechococcus sp. Minos11	GCA_014279855	2284343	60.46	99.64	0
Synechococcus sp. RCC307	GCA_000063525	2224914	60.84	99.64	0
Synechococcus sp. RSCCF101	GCA_008807075	2984853	67.98	98.91	1.63
Synechococcus sp. LTW-R	GCA_014217875	2415533	62.56	100	0.27
Synechococcus sp. XM-24	GCA_003149585	2376968	63.27	100	0.27
Synechococcus lacustris str. Tous	GCA_002006815	1791665	52.65	91.3	0
Synechococcus sp. CBW1108	GCA_015840335	3226220	63.69	99.18	1.36
Synechococcus sp. 8F6	GCA_002252665	2510697	65.83	99.46	0.54
Synechococcus sp. CB0101	GCA_000179235	2789647	64.06	100	0.54
Synechococcus sp. LA31	GCA_018502385	2752151	63.24	99.46	0.54
Synechococcus sp. CBW1002	GCA_015840915	3854122	64.64	100	1.36
Synechococcus sp. CBW1006	GCA_015840525	3860130	64.57	100	1.77
Synechococcus sp. CBW1004	GCA_015840715	3672318	67.06	99.73	0.27
Synechococcus sp. CCY 9618	GCA_019038415	2927161	68.34	99.73	0
Synechococcus sp. CCAP 1479/13	GCA_019038475	3299582	69.32	100	0.54
Synechococcus sp. FACHB-909	GCA_014698945	3179943	69.46	100	0.27
Synechococcus sp. BO 8801	GCA_002252675	3271183	69.16	98.91	0.27
Synechococcus sp. CCAP 1479/9	GCA_019038535	3288920	69.36	99.73	0.27
Synechococcus sp. CCY 0621	GCA_019038465	3230971	67.45	99.73	0
Synechococcus sp. MW101C3	GCA_002252635	3029138	66.13	100	0.41
Synechococcus sp. SynAce01	GCA_001885215	2750634	63.92	99.73	0
Synechococcus sp. 1G10	GCA_002252625	3340220	64.56	99.46	0.27
Synechococcus sp. BSF8S	GCA_014224335	2884859	65.76	99.73	0.27
Synechococcus sp. CBW1107	GCA_015841355	3202093	66.27	99.73	0.27

## Sheet: Table S2
Table S2 ANI values between Synechococcus-like strains and representative strains from family Prochlorococcaceae
Strain	Parasynechococcus marenigrum WH 8102	Prochlorococcus marinus MIT 9313	Cyanobium gracile PCC 6307
Synechococcus sp. CC9616	78.8123	75.8452	77.3259
Synechococcus sp. KORDI-100	78.8607	75.8135	77.6661
Synechococcus sp. Minos11	77.897	76.4455	77.8722
Synechococcus sp. RCC307	77.7128	76.8721	77.8191
Synechococcus sp. RSCCF101	78.061	76.3436	78.631
Synechococcus sp. LTW-R	78.5083	77.5434	78.4855
Synechococcus sp. XM-24	78.3783	76.5855	78.4907
Synechococcus lacustris str. Tous	75.5987	75.2	75.3689
Synechococcus sp. CBW1108	77.5052	77.6283	79.233
Synechococcus sp. 8F6	78.1055	76.6665	79.5932
Synechococcus sp. CB0101	78.061	77.2294	79.125
Synechococcus sp. LA31	77.9485	77.2939	78.6299
Synechococcus sp. CBW1002	78.3921	78.5302	80.1067
Synechococcus sp. CBW1006	78.3724	78.1977	79.9642
Synechococcus sp. CBW1004	78.1431	78.9407	80.1604
Synechococcus sp. CCY 9618	77.6845	76.3306	84.5711
Synechococcus sp. MW101C3	77.4685	76.8321	79.9936
Synechococcus sp. SynAce01	77.3827	78.1074	78.8376
Synechococcus sp. 1G10	77.1394	76.2356	79.3138
Synechococcus sp. BSF8S	77.4444	76.4111	79.4329
Synechococcus sp. CBW1107	77.6555	76.7219	79.5922

## Sheet: Table S3
Table S3 Summary of SSRs and CSSRs in genomes of 54 Parasynechococcus-like strains. Strains were ordered by the appearance in the subclades on the 16S phylogram.
Subclade	Species Name	Isolation Source	Microsatellites				Compound microsatellites
			nSSRa	RAb	RDc		nCSSRd	RAb	RDc	ncSSRe	cSSR%f	Z scoreg
A	Synechococcus sp. RS9907	Indian Ocean	6670	2.58363	18.6862		192	0.07437	1.11054	388	5.82	0.260815
A	Synechococcus sp. RS9902	Indian Ocean	6556	2.64225	19.0072		206	0.08302	1.22037	421	6.43	0.108732
A	Synechococcus sp. N26	Pacific Ocean, Costa Rica Upwelling Dome (CRUD)	5431	2.55348	18.4997		162	0.07617	1.15755	335	6.17	-0.0534807
A	Synechococcus sp. M16.1	Atlantic Ocean	5303	2.51061	18.2693		161	0.07622	1.11588	327	6.17	0.174806
A	Synechococcus sp. A15-44	Atlantic Ocean	6720	2.56296	18.5597		211	0.08047	1.18156	429	6.39	0.184967
A	Synechococcus sp. A15-62	Atlantic Ocean	5912	2.577	18.5285		199	0.08674	1.29155	410	6.94	-0.00733518
A	Parasynechococcus sp. WH 8109	Sargasso Sea	5350	2.53373	18.2168		159	0.0753	1.14325	326	6.1	0.054715
A	Synechococcus sp. UW86	Atlantic Ocean, Sargasso Sea	5344	2.55536	18.5489		156	0.0746	1.16005	322	6.03	-0.0295161
A	Synechococcus sp. MU1617	Tasman Sea	5993	2.57587	18.512		163	0.07006	1.04831	337	5.63	-0.0510734
B	Parasynechococcus sp. CC9902	California current, Pacific (oligotrophic)	5842	2.61407	18.0153		198	0.0886	1.23589	405	6.94	0.0944509
B	Parasynechococcus sp. BL107	Blanes Bay, Mediterranean Sea	6916	2.55124	17.7809		229	0.08448	1.28558	477	6.9	-0.173454
C	Synechococcus sp. UW69	Atlantic Ocean, Sargasso Sea	6114	2.57744	18.3005		195	0.0822	1.19387	402	6.58	-0.0156424
C	Synechococcus sp. MU1611	Australia: Port Hacking NRS	6027	2.57627	18.2835		201	0.08592	1.27681	412	6.84	0.0654136
C	Synechococcus sp. PROS-U-1	Marine environment	6761	2.62461	18.5163		208	0.08075	1.19992	432	6.39	-0.123385
C	Synechococcus sp. KORDI-52	Seawater Pacific Ocean: East China Sea	6706	2.60724	18.5889		218	0.08476	1.27329	448	6.69	0.0300344
D	Parasynechococcus marenigrum WH8102	Sargasso Sea	6181	2.53899	18.3082		198	0.08133	1.1896	408	6.61	-0.00939658
D	Synechococcus sp. A15-24	Marine environment Atlantic Ocean	5833	2.53018	18.3363		195	0.08459	1.26661	409	7.02	-0.256712
D	Synechococcus sp. A18-46.1	Marine environment Atlantic Ocean	6347	2.5678	18.5474		203	0.08213	1.2133	420	6.62	-0.0671981
D	Synechococcus sp. A15-28	Marine environment Atlantic Ocean	6126	2.61618	19.0136		202	0.08627	1.30723	420	6.86	-0.137219
D	Synechococcus sp. BOUM118	Marine environment Mediterranean Sea	5936	2.55176	18.4564		184	0.0791	1.17185	380	6.41	-0.0393801
D	Synechococcus sp. YX04-3	South China Sea	6238	2.5361	18.3093		201	0.08172	1.22699	417	6.69	-0.105607
D	Synechococcus sp. A18-40	Marine environment Atlantic Ocean	5975	2.48798	18.0276		173	0.07204	1.07014	359	6.01	-0.101257
D	Synechococcus sp. WH 8103	Atlantic Ocean	6183	2.54477	18.3834		186	0.07655	1.13801	386	6.25	-0.10581
D	Synechococcus sp. RS9915	Marine environmen Indian Ocean	6184	2.55756	18.541		197	0.08147	1.20558	408	6.6	-0.0804398
E	Synechococcus sp. A15-127	Marine environment Atlantic Ocean	6653	2.61573	19.1027		184	0.07234	1.12091	383	5.76	-0.14605
E	Synechococcus sp. KORDI-49	Pacific Ocean: East China Sea seawater	6819	2.63708	19.3842		214	0.08276	1.33923	452	6.63	-0.371197
F	Synechococcus sp. BS55D	Marine (Black Sea) Bulgaria: eastern Black Sea	5771	2.58185	18.4886		174	0.07784	1.19094	357	6.19	0.0481716
F	Synechococcus sp. BS56D	Marine (Black Sea) Bulgaria: Black Sea	6078	2.63822	19.0101		186	0.08074	1.23794	383	6.31	0.000600659
F	Synechococcus sp. HK01-R	Seawater Hong Kong	6422	2.5904	18.5692		201	0.08108	1.23833	415	6.47	-0.0374463
G	Synechococcus sp. RS9909	Marine environment Indian Ocean	7575	2.90991	21.8223		263	0.10103	1.59267	546	7.21	-0.131889
G	Synechococcus sp. WH 8101	Marine environment Atlantic Ocean	7507	2.86196	21.0593		251	0.09569	1.46129	517	6.89	-0.00408079
H	Synechococcus sp. UW105	Atlantic Ocean, Sargasso Sea	6857	2.57838	18.3397		204	0.07671	1.14461	422	6.16	-0.0650294
H	Synechococcus sp. UW140	Atlantic Ocean, Sargasso Sea	6989	2.58455	18.5748		217	0.08025	1.19705	443	6.34	0.127569
I	Parasynechococcus sp. CC9311	Edge of California current	7146	2.74135	18.6777		229	0.08785	1.23449	464	6.5	0.244696
I	Synechococcus sp. WH 8020	Atlantic Ocean phototrophic growth on SN medium	7177	2.69795	18.3387		256	0.09623	1.34992	527	7.35	0.00494806
I	Synechococcus sp. PROS-9-1	Marine environment Mediterranean Sea	5966	2.62364	18.0225		185	0.08136	1.18341	377	6.32	0.142041
I	Synechococcus sp. MVIR-18-1	Marine environment North Sea	6659	2.71577	18.6238		223	0.09095	1.30793	462	6.94	-0.0905066
I	Synechococcus sp. SYN20	Marine environment North Sea	7399	2.71162	18.6288		227	0.08319	1.16029	462	6.25	0.176543
I	Synechococcus sp. ROS8604	Marine environment Atlantic Ocean	7793	2.70881	18.6582		271	0.0942	1.3372	549	7.05	0.269203
I	Parasynechococcus sp. WH 8016	Woods Hole, MA, USA	7370	2.73485	18.692		253	0.09388	1.31919	520	7.06	0.0301106
J	Synechococcus sp. NOUM97013	Marine environment Pacific Ocean	6506	2.54866	18.0181		214	0.08383	1.20029	435	6.69	0.189624
J	Synechococcus sp. A18-25c	Marine environment Atlantic Ocean	6371	2.53687	17.8433		203	0.08083	1.17506	416	6.53	0.0691458
J	Synechococcus sp. A15-60	Marine environment Atlantic Ocean	6438	2.53126	17.8006		215	0.08453	1.25541	448	6.96	-0.173358
K	Synechococcus sp. PROS-7-1	Marine environment Mediterranean Sea	6674	2.60173	18.2741		212	0.08264	1.19678	429	6.43	0.25425
K	Synechococcus sp. MEDNS5	Marine environment Mediterranean Sea	6476	2.6586	18.9025		185	0.07595	1.1306	380	5.87	0.034234
K	Parasynechococcus sp. WH 7803	Sargasso Sea	6364	2.68866	18.8903		203	0.08576	1.25012	418	6.57	0.000810763
K	Synechococcus sp. BMK-MC-1	Marine environment Mediterranean Sea	6820	2.62192	18.4664		215	0.08266	1.20178	442	6.49	0.0243478
L	Synechococcus sp. MIT S9504	Ocean water	7928	2.568	17.886		235	0.07612	1.09904	483	6.1	0.0291451
L	Synechococcus sp. MIT S9509	Ocean water	7873	2.54963	17.773		233	0.07546	1.07905	477	6.06	0.0893625
L	Synechococcus sp. BIOS-E4-1	Marine environment Pacific Ocean	8668	2.61552	18.2184		286	0.0863	1.27396	594	6.86	-0.144681
L	Synechococcus sp. UW179A	Equatorial Pacific, south of Hawaii	7803	2.55181	17.6524		257	0.08405	1.22276	528	6.77	0.0370667
L	Synechococcus sp. GEYO	Marine isolates	5723	2.44196	17.0579		166	0.07083	1.03388	343	6	-0.0439387
L	Synechococcus sp. MIT S9220	Marine environment Pacific Ocean	6045	2.49363	17.4554		179	0.07384	1.06923	370	6.13	-0.0506378
L	Synechococcus sp. MIT S9508	Ocean water	6247	2.49638	17.4223		174	0.06953	1.01941	360	5.77	-0.0622133
a nSSR: number of SSRs in each genome; b RA, relative abundance = number of SSRs or CSSRs per kb; c RD, relative density = the total length (bp) contributed by each SSR or CSSR per kb of sequence analyzed; d nCSSR: number of CSSRs in each genome; e ncSSR, number of cSSR in each genome; f Percentage of individual SSRs being part of CSSRs (cSSR% = ncSSR/nSSR); g Z score, statistical significance of…

## Sheet: Table S4
Table S4 Detailed information on CSSRs identified in genomes of 54 Parasynechococcus-like strains
Species	Id of CSSR	Motif	Complexity	Length	Gap	Structure	Location region
Synechococcus sp. RS9907	1	T-T	2	12	1	(T)6-(T)6	noncoding
Synechococcus sp. RS9907	2	CGA-AG	2	15	10	(CGA)3-(AG)3	coding
Synechococcus sp. RS9907	3	C-GGC	2	15	8	(C)6-(GGC)3	coding
Synechococcus sp. RS9907	4	GGT-CGG-GGC	3	30	12	(GGT)3-(CGG)4-(GGC)3	coding
Synechococcus sp. RS9907	5	G-T	2	15	1	(G)7-(T)8	noncoding
Synechococcus sp. RS9907	6	A-CCA	2	15	8	(A)6-(CCA)3	coding
Synechococcus sp. RS9907	7	G-C	2	12	5	(G)6-(C)6	noncoding
Synechococcus sp. RS9907	8	CG-CGT	2	15	3	(CG)3-(CGT)3	coding
Synechococcus sp. RS9907	9	TGCT-T	2	20	10	(TGCT)3-(T)8	coding
Synechococcus sp. RS9907	10	GCT-TGG	2	21	4	(GCT)4-(TGG)3	coding
Synechococcus sp. RS9907	11	TC-GC	2	12	2	(TC)3-(GC)3	coding
Synechococcus sp. RS9907	12	A-C	2	12	2	(A)6-(C)6	noncoding
Synechococcus sp. RS9907	13	GT-GC	2	12	0	(GT)3-(GC)3	coding
Synechococcus sp. RS9907	14	G-TG	2	12	4	(G)6-(TG)3	coding
Synechococcus sp. RS9907	15	CA-TC	2	12	2	(CA)3-(TC)3	coding
Synechococcus sp. RS9907	16	GCG-CG	2	15	1	(GCG)3-(CG)3	coding
Synechococcus sp. RS9907	17	TG-TC	2	14	7	(TG)4-(TC)3	coding
Synechococcus sp. RS9907	18	GTG-GCT	2	18	8	(GTG)3-(GCT)3	coding
Synechococcus sp. RS9907	19	GC-GGT	2	15	4	(GC)3-(GGT)3	coding
Synechococcus sp. RS9907	20	GA-AT	2	12	7	(GA)3-(AT)3	coding
Synechococcus sp. RS9907	21	GC-G	2	12	10	(GC)3-(G)6	coding
Synechococcus sp. RS9907	22	CGC-TC	2	15	0	(CGC)3-(TC)3	coding
Synechococcus sp. RS9907	23	AG-CAG	2	15	4	(AG)3-(CAG)3	coding
Synechococcus sp. RS9907	24	CAC-GA	2	15	1	(CAC)3-(GA)3	coding
Synechococcus sp. RS9907	25	G-AG	2	12	0	(G)6-(AG)3	coding
Synechococcus sp. RS9907	26	CA-T	2	13	0	(CA)3-(T)7	coding
Synechococcus sp. RS9907	27	ACC-T	2	15	1	(ACC)3-(T)6	coding
Synechococcus sp. RS9907	28	CAG-TG	2	15	7	(CAG)3-(TG)3	coding
Synechococcus sp. RS9907	29	GCT-G	2	16	0	(GCT)3-(G)7	coding
Synechococcus sp. RS9907	30	C-AG	2	12	9	(C)6-(AG)3	coding
Synechococcus sp. RS9907	31	G-G	2	12	2	(G)6-(G)6	coding
Synechococcus sp. RS9907	32	CT-CAG	2	15	10	(CT)3-(CAG)3	coding
Synechococcus sp. RS9907	33	A-C-G	3	19	3	(A)7-(C)6-(G)6	noncoding
Synechococcus sp. RS9907	34	C-A	2	16	0	(C)8-(A)8	noncoding
Synechococcus sp. RS9907	35	C-CCA	2	15	1	(C)6-(CCA)3	coding
Synechococcus sp. RS9907	36	TGG-GT	2	15	4	(TGG)3-(GT)3	coding
Synechococcus sp. RS9907	37	GTG-C	2	15	2	(GTG)3-(C)6	coding
Synechococcus sp. RS9907	38	C-CG	2	12	6	(C)6-(CG)3	coding
Synechococcus sp. RS9907	39	CT-TC	2	12	0	(CT)3-(TC)3	coding
Synechococcus sp. RS9907	40	GC-GCA	2	15	5	(GC)3-(GCA)3	coding
Synechococcus sp. RS9907	41	GC-AGC	2	15	2	(GC)3-(AGC)3	coding
Synechococcus sp. RS9907	42	TG-AC	2	12	4	(TG)3-(AC)3	coding
Synechococcus sp. RS9907	43	C-G	2	14	4	(C)6-(G)8	coding
Synechococcus sp. RS9907	44	GCG-GC	2	15	2	(GCG)3-(GC)3	coding
Synechococcus sp. RS9907	45	GTC-GTG	2	18	1	(GTC)3-(GTG)3	coding
Synechococcus sp. RS9907	46	GCC-TG	2	18	3	(GCC)4-(TG)3	coding
Synechococcus sp. RS9907	47	GC-CGCCAG	2	24	1	(GC)3-(CGCCAG)3	coding
Synechococcus sp. RS9907	48	A-GAA	2	16	7	(A)7-(GAA)3	coding
Synechococcus sp. RS9907	49	AGC-AAG	2	18	0	(AGC)3-(AAG)3	coding
Synechococcus sp. RS9907	50	A-G-C	3	19	6	(A)7-(G)6-(C)6	noncoding
Synechococcus sp. RS9907	51	CT-AG	2	12	6	(CT)3-(AG)3	noncoding
Synechococcus sp. RS9907	52	T-ACC	2	15	1	(T)6-(ACC)3	coding
Synechococcus sp. RS9907	53	AG-CA	2	12	5	(AG)3-(CA)3	coding
Synechococcus sp. RS9907	54	CTG-G	2	15	4	(CTG)3-(G)6	noncoding
Synechococcus sp. RS9907	55	GTT-CGC	2	21	2	(GTT)3-(CGC)4	coding
Synechococcus sp. RS9907	56	CG-GCT	2	15	6	(CG)3-(GCT)3	coding
Synechococcus sp. RS9907	57	T-T	2	12	10	(T)6-(T)6	noncoding
Synechococcus sp. RS9907	58	T-G	2	13	2	(T)7-(G)6	noncoding
Synechococcus sp. RS9907	59	TTG-GC	2	15	9	(TTG)3-(GC)3	coding
Synechococcus sp. RS9907	60	CAG-GCC	2	18	4	(CAG)3-(GCC)3	coding
Synechococcus sp. RS9907	61	CCA-GT	2	15	6	(CCA)3-(GT)3	coding
Synechococcus sp. RS9907	62	AC-GGA	2	15	4	(AC)3-(GGA)3	coding
Synechococcus sp. RS9907	63	GGA-G	2	15	10	(GGA)3-(G)6	coding
Synechococcus sp. RS9907	64	TC-TGGA	2	18	0	(TC)3-(TGGA)3	coding
Synechococcus sp. RS9907	65	G-AG	2	12	9	(G)6-(AG)3	coding
Synechococcus sp. RS9907	66	AG-AAC	2	15	5	(AG)3-(AAC)3	noncoding
Synechococcus sp. RS9907	67	T-T	2	12	5	(T)6-(T)6	coding
Synechococcus sp. RS9907	68	C-CG	2	12	6	(C)6-(CG)3	coding
Synechococcus sp. RS9907	69	CG-GCT	2	15	10	(CG)3-(GCT)3	coding
Synechococcus sp. RS9907	70	A-A	2	12	3	(A)6-(A)6	noncoding
Synechococcus sp. RS9907	71	TC-T	2	12	0	(TC)3-(T)6	coding
Synechococcus sp. RS9907	72	GC-GC	2	14	10	(GC)3-(GC)4	coding
Synechococcus sp. RS9907	73	C-CGC	2	15	4	(C)6-(CGC)3	coding
Synechococcus sp. RS9907	74	CCA-GCA	2	18	6	(CCA)3-(GCA)3	coding
Synechococcus sp. RS9907	75	GA-TC	2	12	7	(GA)3-(TC)3	coding
Synechococcus sp. RS9907	76	T-C	2	12	8	(T)6-(C)6	noncoding
Synechococcus sp. RS9907	77	GC-G	2	12	9	(GC)3-(G)6	coding
Synechococcus sp. RS9907	78	T-CG	2	12	4	(T)6-(CG)3	coding
Synechococcus sp. RS9907	79	G-ACA	2	15	0	(G)6-(ACA)3	coding
Synechococcus sp. RS9907	80	CT-G	2	12	0	(CT)3-(G)6	coding
Synechococcus sp. RS9907	81	G-CCG	2	16	8	(G)7-(CCG)3	coding
Synechococcus sp. RS9907	82	A-T	2	13	0	(A)7-(T)6	noncoding
Synechococcus sp. RS9907	83	CT-AG	2	12	8	(CT)3-(AG)3	noncoding
Synechococcus sp. RS9907	84	AC-TC	2	12	5	(AC)3-(TC)3	coding
Synechococcus sp. RS9907	85	A-AG	2	13	6	(A)7-(AG)3	coding
Synechococcus sp. RS9907	86	TCA-C	2	15	4	(TCA)3-(C)6	noncoding
Synechococcus sp. RS9907	87	TGG-G	2	15	4	(TGG)3-(G)6	coding
Synechococcus sp. RS9907	88	G-GAG	2	15	7	(G)6-(GAG)3	coding
Synechococcus sp. RS9907	89	GC-TG	2	12	0	(GC)3-(TG)3	coding
Synechococcus sp. RS9907	90	G-GTC	2	15	9	(G)6-(GTC)3	coding
Synechococcus sp. RS9907	91	TC-CAA	2	15	0	(TC)3-(CAA)3	coding
Synechococcus sp. RS9907	92	AG-A	2	12	5	(AG)3-(A)6	noncoding
Synechococcus sp. RS9907	93	AG-AT	2	14	6	(AG)3-(AT)4	coding
Synechococcus sp. RS9907	94	GGA-TGC	2	18	2	(GGA)3-(TGC)3	coding
Synechococcus sp. RS9907	95	G-CT	2	12	7	(G)6-(CT)3	coding
Synechococcus sp. RS9907	96	TC-GA	2	12	6	(TC)3-(GA)3	coding
Synechococcus sp. RS9907	97	CAG-GC	2	15	7	(CAG)3-(GC)3	coding
Synechococcus sp. RS9907	98	A-A	2	12	5	(A)6-(A)6	coding
Synechococcus sp. RS9907	99	A-AG	2	12	6	(A)6-(AG)3	coding
Synechococcus sp. RS9907	100	TGT-CAC	2	21	0	(TGT)3-(CAC)4	coding
Synechococcus sp. RS9907	101	A-G	2	12	0	(A)6-(G)6	noncoding
Synechococcus sp. RS9907	102	ACC-A	2	15	7	(ACC)3-(A)6	noncoding
Synechococcus sp. RS9907	103	A-GA	2	12	1	(A)6-(GA)3	coding
Synechococcus sp. RS9907	104	AC-CA	2	14	6	(AC)3-(CA)4	noncoding
Synechococcus sp. RS9907	105	T-A	2	15	2	(T)8-(A)7	noncoding
Synechococcus sp. RS9907	106	GCA-TGG	2	18	1	(GCA)3-(TGG)3	coding
Synechococcus sp. RS9907	107	CGA-GCA	2	18	0	(CGA)3-(GCA)3	coding
Synechococcus sp. RS9907	108	CAG-CAC-GC	3	24	13	(CAG)3-(CAC)3-(GC)3	coding
Synechococcus sp. RS9907	109	GCG-CGG	2	18	1	(GCG)3-(CGG)3	coding
Synechococcus sp. RS9907	110	CT-TGG	2	18	0	(CT)3-(TGG)4	coding
Synechococcus sp. RS9907	111	CT-C	2	12	9	(CT)3-(C)6	coding
Synechococcus sp. RS9907	112	GA-GC	2	14	5	(GA)3-(GC)4	noncoding
Synechococcus sp. RS9907	113	GA-TC	2	12	10	(GA)3-(TC)3	coding
Synechococcus sp. RS9907	114	CTT-GA	2	15	10	(CTT)3-(GA)3	coding
Synechococcus sp. RS9907	115	T-A	2	13	4	(T)7-(A)6	coding
Synechococcus sp. RS9907	116	GA-G	2	13	6	(GA)3-(G)7	noncoding
Synechococcus sp. RS9907	117	CGA-A	2	24	9	(CGA)6-(A)6	noncoding
Synechococcus sp. RS9907	118	AC-CAC	2	15	10	(AC)3-(CAC)3	coding
Synechococcus sp. RS9907	119	TG-GC	2	12	7	(TG)3-(GC)3	noncoding
Synechococcus sp. RS9907	120	T-A	2	12	5	(T)6-(A)6	noncoding
Synechococcus sp. RS9907	121	GCT-CTG	2	18	4	(GCT)3-(CTG)3	coding
Synechococcus sp. RS9907	122	AC-GC	2	12	10	(AC)3-(GC)3	coding
Synechococcus sp. RS9907	123	GC-GCCA	2	18	3	(GC)3-(GCCA)3	coding
Synechococcus sp. RS9907	124	CGG-G	2	15	6	(CGG)3-(G)6	coding
Synechococcus sp. RS9907	125	TCA-TGA	2	18	9	(TCA)3-(TGA)3	noncoding
Synechococcus sp. RS9907	126	TGC-G	2	15	1	(TGC)3-(G)6	coding
Synechococcus sp. RS9907	127	G-TGG	2	15	3	(G)6-(TGG)3	coding
Synechococcus sp. RS9907	128	CA-C	2	12	9	(CA)3-(C)6	noncoding
Synechococcus sp. RS9907	129	GC-TG	2	12	0	(GC)3-(TG)3	coding
Synechococcus sp. RS9907	130	AG-TC	2	12	3	(AG)3-(TC)3	noncoding
Synechococcus sp. RS9907	131	CA-GCT	2	18	0	(CA)3-(GCT)4	coding
Synechococcus sp. RS9907	132	C-C	2	14	8	(C)7-(C)7	coding
Synechococcus sp. RS9907	133	TA-A	2	12	1	(TA)3-(A)6	coding
Synechococcus sp. RS9907	134	T-A	2	13	0	(T)6-(A)7	coding
Synechococcus sp. RS9907	135	C-CAG	2	15	5	(C)6-(CAG)3	coding
Synechococcus sp. RS9907	136	GC-GA	2	12	8	(GC)3-(GA)3	coding
Synechococcus sp. RS9907	137	A-G	2	12	10	(A)6-(G)6	coding
Synechococcus sp. RS9907	138	AC-GGT	2	15	6	(AC)3-(GGT)3	coding
Synechococcus sp. RS9907	139	CGA-A	2	15	6	(CGA)3-(A)6	noncoding
Synechococcus sp. RS9907	140	TC-C	2	12	0	(TC)3-(C)6	coding
Synechococcus sp. RS9907	141	AG-C	2	12	6	(AG)3-(C)6	noncoding
Synechococcus sp. RS9907	142	GC-GC	2	12	3	(GC)3-(GC)3	coding
Synechococcus sp. RS9907	143	C-G	2	12	4	(C)6-(G)6	coding
Synechococcus sp. RS9907	144	GA-G	2	13	3	(GA)3-(G)7	noncoding
Synechococcus sp. RS9907	145	CCA-CTG	2	18	7	(CCA)3-(CTG)3	coding
Synechococcus sp. RS9907	146	GC-GCA	2	15	1	(GC)3-(GCA)3	coding
Synechococcus sp. RS9907	147	AG-G	2	16	0	(AG)4-(G)8	noncoding
Synechococcus sp. RS9907	148	TCG-GGC	2	18	2	(TCG)3-(GGC)3	coding
Synechococcus sp. RS9907	149	A-GAA	2	17	6	(A)8-(GAA)3	coding
Synechococcus sp. RS9907	150	A-A	2	15	2	(A)7-(A)8	coding
Synechococcus sp. RS9907	151	CGC-GCC	2	18	4	(CGC)3-(GCC)3	coding
Synechococcus sp. RS9907	152	CTG-GCG	2	21	10	(CTG)4-(GCG)3	coding
Synechococcus sp. RS9907	153	GA-G	2	13	6	(GA)3-(G)7	coding
Synechococcus sp. RS9907	154	GC-G	2	12	10	(GC)3-(G)6	coding
Synechococcus sp. RS9907	155	AC-TC	2	12	0	(AC)3-(TC)3	noncoding
Synechococcus sp. RS9907	156	AG-AAG	2	15	9	(AG)3-(AAG)3	coding
Synechococcus sp. RS9907	157	T-AT	2	13	10	(T)7-(AT)3	coding
Synechococcus sp. RS9907	158	TA-T	2	13	7	(TA)3-(T)7	coding
Synechococcus sp. RS9907	159	AG-AG	2	38	2	(AG)4-(AG)15	noncoding
Synechococcus sp. RS9907	160	GC-C	2	12	8	(GC)3-(C)6	coding
Synechococcus sp. RS9907	161	CTC-T	2	17	8	(CTC)3-(T)8	noncoding
Synechococcus sp. RS9907	162	AG-CCTGCA	2	24	7	(AG)3-(CCTGCA)3	coding
Synechococcus sp. RS9907	163	G-T	2	13	3	(G)6-(T)7	noncoding
Synechococcus sp. RS9907	164	GGT-CGA	2	18	0	(GGT)3-(CGA)3	coding
Synechococcus sp. RS9907	165	CG-GGC	2	15	6	(CG)3-(GGC)3	coding
Synechococcus sp. RS9907	166	GCA-GCG	2	18	0	(GCA)3-(GCG)3	coding
Synechococcus sp. RS9907	167	C-GCA	2	15	0	(C)6-(GCA)3	coding
Synechococcus sp. RS9907	168	CTG-GGA	2	18	8	(CTG)3-(GGA)3	coding
Synechococcus sp. RS9907	169	T-T	2	14	8	(T)7-(T)7	coding
Synechococcus sp. RS9907	170	TC-G	2	12	8	(TC)3-(G)6	coding
Synechococcus sp. RS9907	171	CAC-C	2	15	2	(CAC)3-(C)6	coding
Synechococcus sp. RS9907	172	CG-CAA	2	15	4	(CG)3-(CAA)3	coding
Synechococcus sp. RS9907	173	T-A	2	12	7	(T)6-(A)6	noncoding
Synechococcus sp. RS9907	174	AG-CGG	2	15	8	(AG)3-(CGG)3	coding
Synechococcus sp. RS9907	175	CA-GGT	2	15	0	(CA)3-(GGT)3	coding
Synechococcus sp. RS9907	176	AC-A	2	12	6	(AC)3-(A)6	coding
Synechococcus sp. RS9907	177	T-A	2	14	0	(T)7-(A)7	coding
Synechococcus sp. RS9907	178	GC-CAG	2	15	1	(GC)3-(CAG)3	coding
Synechococcus sp. RS9907	179	GGC-GC	2	15	9	(GGC)3-(GC)3	coding
Synechococcus sp. RS9907	180	GCCAAG-CTG	2	27	9	(GCCAAG)3-(CTG)3	coding
Synechococcus sp. RS9907	181	A-G	2	13	10	(A)7-(G)6	noncoding
Synechococcus sp. RS9907	182	TCT-GC	2	15	5	(TCT)3-(GC)3	coding
Synechococcus sp. RS9907	183	GGA-CG	2	15	5	(GGA)3-(CG)3	coding
Synechococcus sp. RS9907	184	AGC-GC	2	21	9	(AGC)5-(GC)3	coding
Synechococcus sp. RS9907	185	G-G	2	12	9	(G)6-(G)6	coding
Synechococcus sp. RS9907	186	CCG-CA	2	15	1	(CCG)3-(CA)3	coding
Synechococcus sp. RS9907	187	TGC-C	2	15	9	(TGC)3-(C)6	coding
Synechococcus sp. RS9907	188	GCA-GAA	2	18	2	(GCA)3-(GAA)3	coding
Synechococcus sp. RS9907	189	CGA-GAC	2	18	5	(CGA)3-(GAC)3	coding
Synechococcus sp. RS9907	190	G-CG	2	12	4	(G)6-(CG)3	coding
Synechococcus sp. RS9907	191	CT-A	2	13	7	(CT)3-(A)7	noncoding
Synechococcus sp. RS9907	192	T-T	2	12	9	(T)6-(T)6	noncoding
Synechococcus sp. RS9902	1	T-T	2	12	1	(T)6-(T)6	noncoding
Synechococcus sp. RS9902	2	CGA-AG	2	15	10	(CGA)3-(AG)3	coding
Synechococcus sp. RS9902	3	C-CGC	2	15	6	(C)6-(CGC)3	coding
Synechococcus sp. RS9902	4	G-T	2	15	1	(G)7-(T)8	noncoding
Synechococcus sp. RS9902	5	A-CCA	2	15	8	(A)6-(CCA)3	coding
Synechococcus sp. RS9902	6	G-C	2	12	5	(G)6-(C)6	noncoding
Synechococcus sp. RS9902	7	GC-GCG	2	17	2	(GC)4-(GCG)3	coding
Synechococcus sp. RS9902	8	GCT-TGG	2	21	4	(GCT)4-(TGG)3	coding
Synechococcus sp. RS9902	9	T-GA	2	15	1	(T)9-(GA)3	coding
Synechococcus sp. RS9902	10	TGG-AGC	2	18	4	(TGG)3-(AGC)3	coding
Synechococcus sp. RS9902	11	GTG-TTG	2	18	3	(GTG)3-(TTG)3	coding
Synechococcus sp. RS9902	12	T-T	2	13	2	(T)7-(T)6	coding
Synechococcus sp. RS9902	13	T-A	2	12	6	(T)6-(A)6	coding
Synechococcus sp. RS9902	14	TC-TG	2	12	5	(TC)3-(TG)3	coding
Synechococcus sp. RS9902	15	GT-GGT	2	15	0	(GT)3-(GGT)3	coding
Synechococcus sp. RS9902	16	GC-GCT	2	15	1	(GC)3-(GCT)3	coding
Synechococcus sp. RS9902	17	GC-ACG	2	15	0	(GC)3-(ACG)3	coding
Synechococcus sp. RS9902	18	AT-T	2	12	8	(AT)3-(T)6	coding
Synechococcus sp. RS9902	19	AC-C	2	12	2	(AC)3-(C)6	coding
Synechococcus sp. RS9902	20	CA-TC	2	12	2	(CA)3-(TC)3	coding
Synechococcus sp. RS9902	21	C-AC	2	12	6	(C)6-(AC)3	coding
Synechococcus sp. RS9902	22	GCG-CG	2	15	1	(GCG)3-(CG)3	coding
Synechococcus sp. RS9902	23	TG-TC	2	12	9	(TG)3-(TC)3	coding
Synechococcus sp. RS9902	24	GC-GGT	2	15	7	(GC)3-(GGT)3	coding
Synechococcus sp. RS9902	25	GT-TG	2	12	0	(GT)3-(TG)3	coding
Synechococcus sp. RS9902	26	CGC-TC	2	15	0	(CGC)3-(TC)3	coding
Synechococcus sp. RS9902	27	AG-CAG	2	15	4	(AG)3-(CAG)3	coding
Synechococcus sp. RS9902	28	CAC-GA	2	15	1	(CAC)3-(GA)3	coding
Synechococcus sp. RS9902	29	G-AG	2	12	0	(G)6-(AG)3	coding
Synechococcus sp. RS9902	30	CA-T	2	13	0	(CA)3-(T)7	coding
Synechococcus sp. RS9902	31	GA-TGT	2	15	9	(GA)3-(TGT)3	coding
Synechococcus sp. RS9902	32	ACC-T	2	15	1	(ACC)3-(T)6	coding
Synechococcus sp. RS9902	33	CAG-TG	2	15	7	(CAG)3-(TG)3	coding
Synechococcus sp. RS9902	34	GCT-G	2	16	0	(GCT)3-(G)7	coding
Synechococcus sp. RS9902	35	AG-G	2	12	6	(AG)3-(G)6	coding
Synechococcus sp. RS9902	36	C-AG	2	14	9	(C)6-(AG)4	coding
Synechococcus sp. RS9902	37	G-G	2	12	2	(G)6-(G)6	coding
Synechococcus sp. RS9902	38	A-C-G	3	19	3	(A)7-(C)6-(G)6	noncoding
Synechococcus sp. RS9902	39	A-T	2	13	0	(A)6-(T)7	noncoding
Synechococcus sp. RS9902	40	G-C-T	3	19	10	(G)6-(C)6-(T)7	noncoding
Synechococcus sp. RS9902	41	AAG-GCT	2	18	3	(AAG)3-(GCT)3	coding
Synechococcus sp. RS9902	42	G-C	2	12	9	(G)6-(C)6	noncoding
Synechococcus sp. RS9902	43	A-C	2	12	0	(A)6-(C)6	noncoding
Synechococcus sp. RS9902	44	CAG-G-G	3	21	10	(CAG)3-(G)6-(G)6	coding
Synechococcus sp. RS9902	45	C-GA	2	12	8	(C)6-(GA)3	coding
Synechococcus sp. RS9902	46	TCC-CAG	2	18	8	(TCC)3-(CAG)3	coding
Synechococcus sp. RS9902	47	GC-G	2	12	4	(GC)3-(G)6	coding
Synechococcus sp. RS9902	48	CCG-GGC	2	18	5	(CCG)3-(GGC)3	coding
Synechococcus sp. RS9902	49	GCC-GC	2	15	5	(GCC)3-(GC)3	coding
Synechococcus sp. RS9902	50	TCG-ACC	2	18	0	(TCG)3-(ACC)3	coding
Synechococcus sp. RS9902	51	T-AT	2	12	5	(T)6-(AT)3	coding
Synechococcus sp. RS9902	52	TGA-T	2	15	7	(TGA)3-(T)6	coding
Synechococcus sp. RS9902	53	C-TG	2	12	6	(C)6-(TG)3	coding
Synechococcus sp. RS9902	54	CGG-GGC	2	18	4	(CGG)3-(GGC)3	coding
Synechococcus sp. RS9902	55	TC-CT	2	12	2	(TC)3-(CT)3	coding
Synechococcus sp. RS9902	56	T-T	2	13	7	(T)6-(T)7	coding
Synechococcus sp. RS9902	57	GCC-CGA	2	18	2	(GCC)3-(CGA)3	coding
Synechococcus sp. RS9902	58	TC-T	2	12	9	(TC)3-(T)6	coding
Synechococcus sp. RS9902	59	CTG-GC	2	15	2	(CTG)3-(GC)3	coding
Synechococcus sp. RS9902	60	CAG-GTG	2	18	6	(CAG)3-(GTG)3	coding
Synechococcus sp. RS9902	61	C-CT	2	14	2	(C)6-(CT)4	noncoding
Synechococcus sp. RS9902	62	GCA-GCA	2	18	3	(GCA)3-(GCA)3	coding
Synechococcus sp. RS9902	63	GC-TC	2	12	8	(GC)3-(TC)3	noncoding
Synechococcus sp. RS9902	64	GGC-G	2	15	8	(GGC)3-(G)6	noncoding
Synechococcus sp. RS9902	65	T-T	2	12	1	(T)6-(T)6	coding
Synechococcus sp. RS9902	66	AG-T	2	13	0	(AG)3-(T)7	coding
Synechococcus sp. RS9902	67	G-CT	2	12	6	(G)6-(CT)3	noncoding
Synechococcus sp. RS9902	68	T-TCG	2	15	6	(T)6-(TCG)3	noncoding
Synechococcus sp. RS9902	69	ACC-GT	2	15	6	(ACC)3-(GT)3	noncoding
Synechococcus sp. RS9902	70	TC-AT	2	12	5	(TC)3-(AT)3	coding
Synechococcus sp. RS9902	71	G-G	2	14	8	(G)7-(G)7	coding
Synechococcus sp. RS9902	72	CAG-TG	2	15	1	(CAG)3-(TG)3	coding
Synechococcus sp. RS9902	73	CA-GC	2	12	0	(CA)3-(GC)3	coding
Synechococcus sp. RS9902	74	G-GT	2	12	8	(G)6-(GT)3	noncoding
Synechococcus sp. RS9902	75	TG-CG	2	12	0	(TG)3-(CG)3	coding
Synechococcus sp. RS9902	76	CCA-C	2	15	3	(CCA)3-(C)6	coding
Synechococcus sp. RS9902	77	C-AGC-CAG	3	24	2	(C)6-(AGC)3-(CAG)3	coding
Synechococcus sp. RS9902	78	T-T	2	12	3	(T)6-(T)6	coding
Synechococcus sp. RS9902	79	GCT-CG	2	18	6	(GCT)4-(CG)3	coding
Synechococcus sp. RS9902	80	C-GCC	2	15	5	(C)6-(GCC)3	coding
Synechococcus sp. RS9902	81	A-A	2	14	2	(A)8-(A)6	noncoding
Synechococcus sp. RS9902	82	TGGC-GC	2	18	3	(TGGC)3-(GC)3	coding
Synechococcus sp. RS9902	83	CTG-CGC	2	18	6	(CTG)3-(CGC)3	coding
Synechococcus sp. RS9902	84	GC-GT	2	12	10	(GC)3-(GT)3	coding
Synechococcus sp. RS9902	85	TTG-G	2	17	7	(TTG)3-(G)8	coding
Synechococcus sp. RS9902	86	G-C-T	3	20	7	(G)6-(C)7-(T)7	noncoding
Synechococcus sp. RS9902	87	CAG-GCA	2	18	2	(CAG)3-(GCA)3	coding
Synechococcus sp. RS9902	88	GTG-GT	2	15	10	(GTG)3-(GT)3	coding
Synechococcus sp. RS9902	89	T-T	2	12	6	(T)6-(T)6	noncoding
Synechococcus sp. RS9902	90	A-ATA	2	15	8	(A)6-(ATA)3	noncoding
Synechococcus sp. RS9902	91	T-AC-T	3	18	18	(T)6-(AC)3-(T)6	noncoding
Synechococcus sp. RS9902	92	AT-GAG	2	17	0	(AT)4-(GAG)3	coding
Synechococcus sp. RS9902	93	TA-T	2	13	0	(TA)3-(T)7	noncoding
Synechococcus sp. RS9902	94	AC-T	2	12	10	(AC)3-(T)6	coding
Synechococcus sp. RS9902	95	T-TA	2	12	5	(T)6-(TA)3	noncoding
Synechococcus sp. RS9902	96	TC-T	2	14	10	(TC)4-(T)6	coding
Synechococcus sp. RS9902	97	T-A	2	13	6	(T)6-(A)7	noncoding
Synechococcus sp. RS9902	98	T-AT	2	12	0	(T)6-(AT)3	noncoding
Synechococcus sp. RS9902	99	TG-TG	2	14	8	(TG)4-(TG)3	noncoding
Synechococcus sp. RS9902	100	GCA-G	2	15	3	(GCA)3-(G)6	coding
Synechococcus sp. RS9902	101	TGC-TCG	2	18	0	(TGC)3-(TCG)3	coding
Synechococcus sp. RS9902	102	CT-GC	2	14	1	(CT)4-(GC)3	coding
Synechococcus sp. RS9902	103	T-TC	2	13	9	(T)7-(TC)3	noncoding
Synechococcus sp. RS9902	104	T-TA	2	12	6	(T)6-(TA)3	coding
Synechococcus sp. RS9902	105	TGG-TC	2	18	4	(TGG)4-(TC)3	coding
Synechococcus sp. RS9902	106	CCA-TGC	2	18	1	(CCA)3-(TGC)3	coding
Synechococcus sp. RS9902	107	T-A	2	15	2	(T)7-(A)8	noncoding
Synechococcus sp. RS9902	108	GT-TAG	2	15	4	(GT)3-(TAG)3	coding
Synechococcus sp. RS9902	109	T-T	2	13	9	(T)7-(T)6	noncoding
Synechococcus sp. RS9902	110	TG-GT	2	14	6	(TG)4-(GT)3	noncoding
Synechococcus sp. RS9902	111	T-C	2	15	5	(T)6-(C)9	noncoding
Synechococcus sp. RS9902	112	C-T	2	13	0	(C)6-(T)7	noncoding
Synechococcus sp. RS9902	113	TTG-T	2	16	3	(TTG)3-(T)7	coding
Synechococcus sp. RS9902	114	G-ACA	2	15	8	(G)6-(ACA)3	coding
Synechococcus sp. RS9902	115	GC-TGC	2	15	5	(GC)3-(TGC)3	coding
Synechococcus sp. RS9902	116	A-CAC	2	16	5	(A)7-(CAC)3	coding
Synechococcus sp. RS9902	117	T-GC	2	15	2	(T)7-(GC)4	coding
Synechococcus sp. RS9902	118	GA-GATC-T	3	24	12	(GA)3-(GATC)3-(T)6	coding
Synechococcus sp. RS9902	119	GCA-CCT	2	18	0	(GCA)3-(CCT)3	coding
Synechococcus sp. RS9902	120	GTA-TAC	2	18	6	(GTA)3-(TAC)3	noncoding
Synechococcus sp. RS9902	121	TTG-GA	2	15	0	(TTG)3-(GA)3	coding
Synechococcus sp. RS9902	122	C-GC	2	12	9	(C)6-(GC)3	coding
Synechococcus sp. RS9902	123	GCA-G	2	15	0	(GCA)3-(G)6	coding
Synechococcus sp. RS9902	124	CA-GC	2	12	0	(CA)3-(GC)3	coding
Synechococcus sp. RS9902	125	C-G	2	13	0	(C)6-(G)7	noncoding
Synechococcus sp. RS9902	126	CT-TC	2	12	4	(CT)3-(TC)3	coding
Synechococcus sp. RS9902	127	GCA-CGC	2	18	1	(GCA)3-(CGC)3	coding
Synechococcus sp. RS9902	128	C-CCA	2	15	4	(C)6-(CCA)3	coding
Synechococcus sp. RS9902	129	CTT-T	2	15	9	(CTT)3-(T)6	coding
Synechococcus sp. RS9902	130	GC-A	2	13	4	(GC)3-(A)7	coding
Synechococcus sp. RS9902	131	G-TGA	2	15	4	(G)6-(TGA)3	noncoding
Synechococcus sp. RS9902	132	TGG-CGG	2	18	0	(TGG)3-(CGG)3	coding
Synechococcus sp. RS9902	133	T-TTG	2	15	7	(T)6-(TTG)3	coding
Synechococcus sp. RS9902	134	T-GA	2	13	7	(T)7-(GA)3	coding
Synechococcus sp. RS9902	135	A-T	2	12	1	(A)6-(T)6	coding
Synechococcus sp. RS9902	136	CGG-C	2	16	8	(CGG)3-(C)7	coding
Synechococcus sp. RS9902	137	C-AG	2	12	0	(C)6-(AG)3	coding
Synechococcus sp. RS9902	138	TGT-C	2	15	0	(TGT)3-(C)6	coding
Synechococcus sp. RS9902	139	CCA-GCT	2	18	3	(CCA)3-(GCT)3	coding
Synechococcus sp. RS9902	140	CTT-T	2	15	9	(CTT)3-(T)6	coding
Synechococcus sp. RS9902	141	C-GC	2	12	9	(C)6-(GC)3	coding
Synechococcus sp. RS9902	142	G-A	2	12	8	(G)6-(A)6	noncoding
Synechococcus sp. RS9902	143	GCT-TGG	2	18	8	(GCT)3-(TGG)3	coding
Synechococcus sp. RS9902	144	A-GATC	2	18	7	(A)6-(GATC)3	coding
Synechococcus sp. RS9902	145	GC-GA	2	12	5	(GC)3-(GA)3	noncoding
Synechococcus sp. RS9902	146	G-T	2	13	3	(G)6-(T)7	noncoding
Synechococcus sp. RS9902	147	CA-AC	2	12	0	(CA)3-(AC)3	noncoding
Synechococcus sp. RS9902	148	CT-C	2	12	9	(CT)3-(C)6	coding
Synechococcus sp. RS9902	149	CTC-GT	2	15	5	(CTC)3-(GT)3	coding
Synechococcus sp. RS9902	150	AC-GTG	2	15	5	(AC)3-(GTG)3	coding
Synechococcus sp. RS9902	151	A-C	2	14	3	(A)8-(C)6	noncoding
Synechococcus sp. RS9902	152	G-C	2	12	3	(G)6-(C)6	coding
Synechococcus sp. RS9902	153	A-A	2	14	4	(A)7-(A)7	coding
Synechococcus sp. RS9902	154	CA-GA	2	12	2	(CA)3-(GA)3	noncoding
Synechococcus sp. RS9902	155	C-AC	2	16	0	(C)6-(AC)5	noncoding
Synechococcus sp. RS9902	156	G-GT	2	12	6	(G)6-(GT)3	noncoding
Synechococcus sp. RS9902	157	AGC-CG	2	15	6	(AGC)3-(CG)3	coding
Synechococcus sp. RS9902	158	C-GCA	2	15	3	(C)6-(GCA)3	noncoding
Synechococcus sp. RS9902	159	G-C	2	13	7	(G)7-(C)6	noncoding
Synechococcus sp. RS9902	160	G-A	2	12	7	(G)6-(A)6	noncoding
Synechococcus sp. RS9902	161	GA-CT	2	14	3	(GA)3-(CT)4	coding
Synechococcus sp. RS9902	162	A-AC	2	12	7	(A)6-(AC)3	coding
Synechococcus sp. RS9902	163	GGATC-C	2	21	10	(GGATC)3-(C)6	noncoding
Synechococcus sp. RS9902	164	CA-GGC	2	18	3	(CA)3-(GGC)4	coding
Synechococcus sp. RS9902	165	CA-A	2	12	0	(CA)3-(A)6	coding
Synechococcus sp. RS9902	166	GC-CGC	2	15	2	(GC)3-(CGC)3	coding
Synechococcus sp. RS9902	167	C-G	2	14	4	(C)8-(G)6	coding
Synechococcus sp. RS9902	168	GT-CA	2	12	4	(GT)3-(CA)3	coding
Synechococcus sp. RS9902	169	CTG-GC	2	15	6	(CTG)3-(GC)3	coding
Synechococcus sp. RS9902	170	TC-TG	2	14	10	(TC)4-(TG)3	coding
Synechococcus sp. RS9902	171	AC-CCA	2	15	4	(AC)3-(CCA)3	coding
Synechococcus sp. RS9902	172	TGG-G	2	15	1	(TGG)3-(G)6	coding
Synechococcus sp. RS9902	173	C-C	2	12	7	(C)6-(C)6	noncoding
Synechococcus sp. RS9902	174	GGA-T	2	17	2	(GGA)3-(T)8	coding
Synechococcus sp. RS9902	175	A-TA	2	12	6	(A)6-(TA)3	coding
Synechococcus sp. RS9902	176	T-A	2	12	10	(T)6-(A)6	coding
Synechococcus sp. RS9902	177	TC-A	2	12	1	(TC)3-(A)6	coding
Synechococcus sp. RS9902	178	G-CTG	2	15	2	(G)6-(CTG)3	coding
Synechococcus sp. RS9902	179	GT-TC	2	12	6	(GT)3-(TC)3	coding
Synechococcus sp. RS9902	180	C-GTT	2	15	9	(C)6-(GTT)3	coding
Synechococcus sp. RS9902	181	AGC-CCA	2	18	10	(AGC)3-(CCA)3	coding
Synechococcus sp. RS9902	182	G-TG	2	17	7	(G)7-(TG)5	noncoding
Synechococcus sp. RS9902	183	A-C	2	14	1	(A)8-(C)6	noncoding
Synechococcus sp. RS9902	184	CG-CAA	2	15	4	(CG)3-(CAA)3	coding
Synechococcus sp. RS9902	185	CA-GGT	2	15	0	(CA)3-(GGT)3	coding
Synechococcus sp. RS9902	186	GC-GC	2	14	5	(GC)3-(GC)4	coding
Synechococcus sp. RS9902	187	GGC-GC	2	15	9	(GGC)3-(GC)3	coding
Synechococcus sp. RS9902	188	GCCAAG-GCT	2	27	8	(GCCAAG)3-(GCT)3	coding
Synechococcus sp. RS9902	189	TCT-GC	2	15	5	(TCT)3-(GC)3	coding
Synechococcus sp. RS9902	190	GGA-CG	2	15	5	(GGA)3-(CG)3	coding
Synechococcus sp. RS9902	191	CAG-GC	2	15	10	(CAG)3-(GC)3	coding
Synechococcus sp. RS9902	192	AT-T	2	12	3	(AT)3-(T)6	coding
Synechococcus sp. RS9902	193	TA-AG	2	20	0	(TA)4-(AG)6	coding
Synechococcus sp. RS9902	194	T-A-T	3	19	13	(T)6-(A)7-(T)6	coding
Synechococcus sp. RS9902	195	GA-GC	2	12	9	(GA)3-(GC)3	coding
Synechococcus sp. RS9902	196	CA-GA	2	12	7	(CA)3-(GA)3	coding
Synechococcus sp. RS9902	197	TGC-C	2	15	9	(TGC)3-(C)6	coding
Synechococcus sp. RS9902	198	GCA-GAA	2	18	2	(GCA)3-(GAA)3	coding
Synechococcus sp. RS9902	199	G-AC	2	13	10	(G)7-(AC)3	coding
Synechococcus sp. RS9902	200	G-CAA	2	15	10	(G)6-(CAA)3	coding
Synechococcus sp. RS9902	201	G-CG	2	12	4	(G)6-(CG)3	coding
Synechococcus sp. RS9902	202	CTG-A	2	15	6	(CTG)3-(A)6	coding
Synechococcus sp. RS9902	203	CT-A	2	13	7	(CT)3-(A)7	noncoding
Synechococcus sp. RS9902	204	T-T-GT	3	18	17	(T)6-(T)6-(GT)3	noncoding
Synechococcus sp. RS9902	205	A-A	2	13	2	(A)6-(A)7	noncoding
Synechococcus sp. RS9902	206	C-GCT	2	15	0	(C)6-(GCT)3	coding
Synechococcus sp. N26	1	GCC-TG	2	18	3	(GCC)4-(TG)3	coding
Synechococcus sp. N26	2	GC-CGCCAG	2	24	1	(GC)3-(CGCCAG)3	coding
Synechococcus sp. N26	3	G-GCCGA	2	21	7	(G)6-(GCCGA)3	noncoding
Synechococcus sp. N26	4	AT-GAC	2	15	10	(AT)3-(GAC)3	coding
Synechococcus sp. N26	5	C-AC	2	26	0	(C)12-(AC)7	coding
Synechococcus sp. N26	6	CG-GCT	2	15	6	(CG)3-(GCT)3	coding
Synechococcus sp. N26	7	CCT-G	2	15	0	(CCT)3-(G)6	noncoding
Synechococcus sp. N26	8	G-GT	2	12	2	(G)6-(GT)3	coding
Synechococcus sp. N26	9	CT-T	2	14	6	(CT)3-(T)8	noncoding
Synechococcus sp. N26	10	CT-CT	2	14	6	(CT)3-(CT)4	coding
Synechococcus sp. N26	11	CAC-GAC	2	18	1	(CAC)3-(GAC)3	coding
Synechococcus sp. N26	12	GC-CGC	2	15	2	(GC)3-(CGC)3	coding
Synechococcus sp. N26	13	C-G	2	14	4	(C)8-(G)6	coding
Synechococcus sp. N26	14	GT-CA	2	12	4	(GT)3-(CA)3	coding
Synechococcus sp. N26	15	A-A	2	12	3	(A)6-(A)6	coding
Synechococcus sp. N26	16	CG-CA	2	12	0	(CG)3-(CA)3	coding
Synechococcus sp. N26	17	CA-C	2	12	9	(CA)3-(C)6	noncoding
Synechococcus sp. N26	18	G-TG	2	12	5	(G)6-(TG)3	coding
Synechococcus sp. N26	19	CA-GCT	2	18	0	(CA)3-(GCT)4	coding
Synechococcus sp. N26	20	C-C	2	14	8	(C)7-(C)7	coding
Synechococcus sp. N26	21	C-CAG	2	15	5	(C)6-(CAG)3	coding
Synechococcus sp. N26	22	AC-GGT	2	15	6	(AC)3-(GGT)3	coding
Synechococcus sp. N26	23	CGA-A	2	15	6	(CGA)3-(A)6	noncoding
Synechococcus sp. N26	24	GC-CAG	2	15	1	(GC)3-(CAG)3	coding
Synechococcus sp. N26	25	GGC-GC	2	15	9	(GGC)3-(GC)3	coding
Synechococcus sp. N26	26	AGGCCA-GCT	2	27	10	(AGGCCA)3-(GCT)3	coding
Synechococcus sp. N26	27	TCT-GC	2	15	5	(TCT)3-(GC)3	coding
Synechococcus sp. N26	28	CG-GGA-CG	3	21	5	(CG)3-(GGA)3-(CG)3	coding
Synechococcus sp. N26	29	AGC-GC	2	21	9	(AGC)5-(GC)3	coding
Synechococcus sp. N26	30	A-A	2	14	10	(A)8-(A)6	coding
Synechococcus sp. N26	31	AG-A	2	12	8	(AG)3-(A)6	coding
Synechococcus sp. N26	32	A-A	2	14	9	(A)8-(A)6	noncoding
Synechococcus sp. N26	33	G-C	2	12	9	(G)6-(C)6	noncoding
Synechococcus sp. N26	34	GTT-A	2	15	5	(GTT)3-(A)6	coding
Synechococcus sp. N26	35	G-T-TA	3	18	4	(G)6-(T)6-(TA)3	noncoding
Synechococcus sp. N26	36	TGC-C	2	15	9	(TGC)3-(C)6	coding
Synechococcus sp. N26	37	GCA-GAA	2	18	2	(GCA)3-(GAA)3	coding
Synechococcus sp. N26	38	GGT-GC	2	15	7	(GGT)3-(GC)3	coding
Synechococcus sp. N26	39	CG-AGC	2	15	2	(CG)3-(AGC)3	coding
Synechococcus sp. N26	40	AG-GA-AGC	3	21	7	(AG)3-(GA)3-(AGC)3	coding
Synechococcus sp. N26	41	G-CG	2	12	4	(G)6-(CG)3	coding
Synechococcus sp. N26	42	C-GCT	2	15	0	(C)6-(GCT)3	coding
Synechococcus sp. N26	43	T-T	2	12	1	(T)6-(T)6	noncoding
Synechococcus sp. N26	44	CGA-AG	2	15	10	(CGA)3-(AG)3	coding
Synechococcus sp. N26	45	C-GGC-GGC-CGG	4	33	22	(C)6-(GGC)3-(GGC)3-(CGG)3	coding
Synechococcus sp. N26	46	GGT-CGG	2	21	5	(GGT)4-(CGG)3	coding
Synechococcus sp. N26	47	G-T	2	15	1	(G)7-(T)8	noncoding
Synechococcus sp. N26	48	TGC-CG	2	15	3	(TGC)3-(CG)3	coding
Synechococcus sp. N26	49	G-C	2	12	5	(G)6-(C)6	noncoding
Synechococcus sp. N26	50	T-TC	2	12	1	(T)6-(TC)3	coding
Synechococcus sp. N26	51	T-A	2	12	5	(T)6-(A)6	coding
Synechococcus sp. N26	52	TC-T	2	12	7	(TC)3-(T)6	coding
Synechococcus sp. N26	53	TA-T	2	12	0	(TA)3-(T)6	coding
Synechococcus sp. N26	54	CT-A	2	12	9	(CT)3-(A)6	coding
Synechococcus sp. N26	55	T-CA	2	12	2	(T)6-(CA)3	coding
Synechococcus sp. N26	56	TC-T	2	12	0	(TC)3-(T)6	coding
Synechococcus sp. N26	57	T-CT	2	15	0	(T)7-(CT)4	coding
Synechococcus sp. N26	58	CT-CAC	2	15	8	(CT)3-(CAC)3	coding
Synechococcus sp. N26	59	ACA-CG	2	17	1	(ACA)3-(CG)4	coding
Synechococcus sp. N26	60	A-TGG	2	15	9	(A)6-(TGG)3	coding
Synechococcus sp. N26	61	AT-T	2	12	6	(AT)3-(T)6	noncoding
Synechococcus sp. N26	62	A-T	2	12	1	(A)6-(T)6	coding
Synechococcus sp. N26	63	TCG-GTC	2	18	5	(TCG)3-(GTC)3	coding
Synechococcus sp. N26	64	CA-TC	2	12	2	(CA)3-(TC)3	coding
Synechococcus sp. N26	65	GCG-CG	2	15	1	(GCG)3-(CG)3	coding
Synechococcus sp. N26	66	TG-TC	2	12	9	(TG)3-(TC)3	coding
Synechococcus sp. N26	67	GTG-GCT	2	18	8	(GTG)3-(GCT)3	coding
Synechococcus sp. N26	68	G-CTG	2	15	2	(G)6-(CTG)3	coding
Synechococcus sp. N26	69	T-G	2	13	2	(T)7-(G)6	noncoding
Synechococcus sp. N26	70	CCA-GT	2	15	6	(CCA)3-(GT)3	coding
Synechococcus sp. N26	71	ACC-ACC	2	18	6	(ACC)3-(ACC)3	coding
Synechococcus sp. N26	72	G-AG	2	12	9	(G)6-(AG)3	coding
Synechococcus sp. N26	73	AG-AAC	2	15	5	(AG)3-(AAC)3	noncoding
Synechococcus sp. N26	74	CCA-GCA	2	18	6	(CCA)3-(GCA)3	coding
Synechococcus sp. N26	75	TC-TG	2	12	5	(TC)3-(TG)3	coding
Synechococcus sp. N26	76	CTG-CTG	2	18	9	(CTG)3-(CTG)3	coding
Synechococcus sp. N26	77	T-C	2	12	8	(T)6-(C)6	noncoding
Synechococcus sp. N26	78	GC-G	2	12	9	(GC)3-(G)6	coding
Synechococcus sp. N26	79	GCA-TGG	2	18	5	(GCA)3-(TGG)3	coding
Synechococcus sp. N26	80	CT-T	2	13	9	(CT)3-(T)7	coding
Synechococcus sp. N26	81	AT-A	2	13	7	(AT)3-(A)7	coding
Synechococcus sp. N26	82	G-ACA	2	15	0	(G)6-(ACA)3	coding
Synechococcus sp. N26	83	CT-G	2	12	0	(CT)3-(G)6	coding
Synechococcus sp. N26	84	CA-CGC	2	15	5	(CA)3-(CGC)3	noncoding
Synechococcus sp. N26	85	TCA-C	2	15	4	(TCA)3-(C)6	noncoding
Synechococcus sp. N26	86	TGG-G	2	15	4	(TGG)3-(G)6	coding
Synechococcus sp. N26	87	G-GAG	2	15	7	(G)6-(GAG)3	coding
Synechococcus sp. N26	88	GCG-TGC	2	18	1	(GCG)3-(TGC)3	coding
Synechococcus sp. N26	89	G-CAG	2	15	10	(G)6-(CAG)3	coding
Synechococcus sp. N26	90	CTG-TC	2	15	6	(CTG)3-(TC)3	coding
Synechococcus sp. N26	91	CAG-A	2	17	7	(CAG)3-(A)8	coding
Synechococcus sp. N26	92	GGA-TGC	2	18	2	(GGA)3-(TGC)3	coding
Synechococcus sp. N26	93	CAG-GC	2	15	7	(CAG)3-(GC)3	coding
Synechococcus sp. N26	94	A-A	2	13	4	(A)6-(A)7	coding
Synechococcus sp. N26	95	A-TG	2	12	6	(A)6-(TG)3	noncoding
Synechococcus sp. N26	96	A-T	2	13	7	(A)7-(T)6	noncoding
Synechococcus sp. N26	97	GA-TC	2	14	0	(GA)3-(TC)4	coding
Synechococcus sp. N26	98	AC-CA	2	14	6	(AC)3-(CA)4	noncoding
Synechococcus sp. N26	99	A-C	2	12	0	(A)6-(C)6	noncoding
Synechococcus sp. N26	100	CAG-G-G	3	22	9	(CAG)3-(G)6-(G)7	coding
Synechococcus sp. N26	101	GA-CT	2	12	1	(GA)3-(CT)3	coding
Synechococcus sp. N26	102	GCC-GCT	2	24	10	(GCC)4-(GCT)4	coding
Synechococcus sp. N26	103	GC-G	2	12	4	(GC)3-(G)6	coding
Synechococcus sp. N26	104	TC-C	2	12	0	(TC)3-(C)6	coding
Synechococcus sp. N26	105	GTC-ACC	2	18	1	(GTC)3-(ACC)3	coding
Synechococcus sp. N26	106	TC-T	2	12	0	(TC)3-(T)6	coding
Synechococcus sp. N26	107	C-TC	2	13	6	(C)7-(TC)3	coding
Synechococcus sp. N26	108	CGC-CAG	2	21	10	(CGC)3-(CAG)4	coding
Synechococcus sp. N26	109	CGG-GGC	2	18	4	(CGG)3-(GGC)3	coding
Synechococcus sp. N26	110	GCC-CGA	2	18	2	(GCC)3-(CGA)3	coding
Synechococcus sp. N26	111	GTT-TGC	2	18	9	(GTT)3-(TGC)3	coding
Synechococcus sp. N26	112	CAG-GTG	2	18	6	(CAG)3-(GTG)3	coding
Synechococcus sp. N26	113	C-CT	2	14	2	(C)6-(CT)4	noncoding
Synechococcus sp. N26	114	CGG-G	2	15	3	(CGG)3-(G)6	coding
Synechococcus sp. N26	115	CTG-GGC	2	18	3	(CTG)3-(GGC)3	coding
Synechococcus sp. N26	116	G-CT	2	12	6	(G)6-(CT)3	noncoding
Synechococcus sp. N26	117	G-CGG	2	15	0	(G)6-(CGG)3	coding
Synechococcus sp. N26	118	T-G	2	15	9	(T)9-(G)6	noncoding
Synechococcus sp. N26	119	A-A	2	12	1	(A)6-(A)6	coding
Synechococcus sp. N26	120	GC-C	2	12	5	(GC)3-(C)6	coding
Synechococcus sp. N26	121	A-A	2	12	8	(A)6-(A)6	noncoding
Synechococcus sp. N26	122	GA-CT	2	12	5	(GA)3-(CT)3	coding
Synechococcus sp. N26	123	CGA-GCA	2	18	0	(CGA)3-(GCA)3	coding
Synechococcus sp. N26	124	CAG-CAC	2	18	8	(CAG)3-(CAC)3	coding
Synechococcus sp. N26	125	GCG-CGG	2	18	1	(GCG)3-(CGG)3	coding
Synechococcus sp. N26	126	AGC-AC	2	18	1	(AGC)4-(AC)3	coding
Synechococcus sp. N26	127	GC-C	2	12	0	(GC)3-(C)6	coding
Synechococcus sp. N26	128	CA-A	2	12	0	(CA)3-(A)6	noncoding
Synechococcus sp. N26	129	G-C-T	3	18	7	(G)6-(C)6-(T)6	noncoding
Synechococcus sp. N26	130	AC-CAC	2	15	10	(AC)3-(CAC)3	coding
Synechococcus sp. N26	131	TG-GC	2	12	7	(TG)3-(GC)3	noncoding
Synechococcus sp. N26	132	GCT-CTG	2	18	4	(GCT)3-(CTG)3	coding
Synechococcus sp. N26	133	GCG-GCA	2	18	5	(GCG)3-(GCA)3	coding
Synechococcus sp. N26	134	CGG-G	2	15	6	(CGG)3-(G)6	coding
Synechococcus sp. N26	135	CG-GCA	2	18	7	(CG)3-(GCA)4	coding
Synechococcus sp. N26	136	GA-G	2	12	1	(GA)3-(G)6	coding
Synechococcus sp. N26	137	CTG-GC	2	15	6	(CTG)3-(GC)3	coding
Synechococcus sp. N26	138	A-CAG	2	18	0	(A)6-(CAG)4	noncoding
Synechococcus sp. N26	139	AC-CCA	2	15	4	(AC)3-(CCA)3	coding
Synechococcus sp. N26	140	AGC-AG	2	15	2	(AGC)3-(AG)3	coding
Synechococcus sp. N26	141	TGG-G	2	15	1	(TGG)3-(G)6	coding
Synechococcus sp. N26	142	GT-AG	2	14	0	(GT)3-(AG)4	noncoding
Synechococcus sp. N26	143	CT-GT-GT-GC	4	24	15	(CT)3-(GT)3-(GT)3-(GC)3	coding
Synechococcus sp. N26	144	CAA-GT	2	15	3	(CAA)3-(GT)3	coding
Synechococcus sp. N26	145	T-TC	2	12	6	(T)6-(TC)3	noncoding
Synechococcus sp. N26	146	A-A	2	12	7	(A)6-(A)6	coding
Synechococcus sp. N26	147	GT-TC	2	12	6	(GT)3-(TC)3	coding
Synechococcus sp. N26	148	GC-G-C	3	18	15	(GC)3-(G)6-(C)6	noncoding
Synechococcus sp. N26	149	G-G	2	12	9	(G)6-(G)6	coding
Synechococcus sp. N26	150	C-G-T	3	19	3	(C)6-(G)6-(T)7	noncoding
Synechococcus sp. N26	151	C-C	2	12	2	(C)6-(C)6	coding
Synechococcus sp. N26	152	CT-G	2	12	9	(CT)3-(G)6	coding
Synechococcus sp. N26	153	C-CT	2	12	6	(C)6-(CT)3	coding
Synechococcus sp. N26	154	C-AGC	2	15	1	(C)6-(AGC)3	coding
Synechococcus sp. N26	155	CA-GCT	2	15	6	(CA)3-(GCT)3	coding
Synechococcus sp. N26	156	ACA-TC	2	15	9	(ACA)3-(TC)3	coding
Synechococcus sp. N26	157	CAG-GCA	2	18	7	(CAG)3-(GCA)3	coding
Synechococcus sp. N26	158	A-TG	2	13	0	(A)7-(TG)3	coding
Synechococcus sp. N26	159	CT-C	2	12	0	(CT)3-(C)6	coding
Synechococcus sp. N26	160	TC-GGT	2	15	0	(TC)3-(GGT)3	coding
Synechococcus sp. N26	161	GA-GCG	2	15	0	(GA)3-(GCG)3	coding
Synechococcus sp. N26	162	C-GC	2	12	10	(C)6-(GC)3	coding
Synechococcus sp. M16.1	1	T-T	2	12	1	(T)6-(T)6	noncoding
Synechococcus sp. M16.1	2	CGA-AG	2	15	10	(CGA)3-(AG)3	coding
Synechococcus sp. M16.1	3	C-GGC-GGC-GGC	4	33	17	(C)6-(GGC)3-(GGC)3-(GGC)3	coding
Synechococcus sp. M16.1	4	G-T	2	14	1	(G)7-(T)7	noncoding
Synechococcus sp. M16.1	5	CG-CGT	2	15	3	(CG)3-(CGT)3	coding
Synechococcus sp. M16.1	6	CGC-C	2	18	3	(CGC)4-(C)6	coding
Synechococcus sp. M16.1	7	A-TGG	2	15	9	(A)6-(TGG)3	coding
Synechococcus sp. M16.1	8	A-A	2	12	5	(A)6-(A)6	noncoding
Synechococcus sp. M16.1	9	GT-GGT	2	15	0	(GT)3-(GGT)3	coding
Synechococcus sp. M16.1	10	AC-C	2	12	2	(AC)3-(C)6	coding
Synechococcus sp. M16.1	11	CA-TC	2	12	2	(CA)3-(TC)3	coding
Synechococcus sp. M16.1	12	GCG-CG	2	15	1	(GCG)3-(CG)3	coding
Synechococcus sp. M16.1	13	TG-TC	2	12	9	(TG)3-(TC)3	coding
Synechococcus sp. M16.1	14	GTG-GCT	2	18	8	(GTG)3-(GCT)3	coding
Synechococcus sp. M16.1	15	G-C	2	12	5	(G)6-(C)6	noncoding
Synechococcus sp. M16.1	16	GC-G	2	12	10	(GC)3-(G)6	coding
Synechococcus sp. M16.1	17	CGC-TC	2	15	0	(CGC)3-(TC)3	coding
Synechococcus sp. M16.1	18	AG-CAG	2	15	4	(AG)3-(CAG)3	coding
Synechococcus sp. M16.1	19	CAC-GA	2	15	1	(CAC)3-(GA)3	coding
Synechococcus sp. M16.1	20	TG-A	2	12	2	(TG)3-(A)6	coding
Synechococcus sp. M16.1	21	G-AG	2	12	0	(G)6-(AG)3	coding
Synechococcus sp. M16.1	22	CA-T	2	13	0	(CA)3-(T)7	coding
Synechococcus sp. M16.1	23	ACC-T	2	15	1	(ACC)3-(T)6	coding
Synechococcus sp. M16.1	24	CAG-TG	2	15	7	(CAG)3-(TG)3	coding
Synechococcus sp. M16.1	25	GCT-G	2	16	0	(GCT)3-(G)7	coding
Synechococcus sp. M16.1	26	C-AG	2	12	9	(C)6-(AG)3	coding
Synechococcus sp. M16.1	27	G-G	2	12	2	(G)6-(G)6	coding
Synechococcus sp. M16.1	28	A-C-G	3	19	3	(A)7-(C)6-(G)6	noncoding
Synechococcus sp. M16.1	29	G-C	2	12	9	(G)6-(C)6	noncoding
Synechococcus sp. M16.1	30	TCC-GA	2	15	3	(TCC)3-(GA)3	coding
Synechococcus sp. M16.1	31	GCA-C	2	15	3	(GCA)3-(C)6	coding
Synechococcus sp. M16.1	32	C-CCA	2	15	1	(C)6-(CCA)3	coding
Synechococcus sp. M16.1	33	CT-TGC	2	15	1	(CT)3-(TGC)3	coding
Synechococcus sp. M16.1	34	TGG-GT	2	15	4	(TGG)3-(GT)3	coding
Synechococcus sp. M16.1	35	CA-GA	2	14	10	(CA)3-(GA)4	coding
Synechococcus sp. M16.1	36	GC-GCA	2	15	5	(GC)3-(GCA)3	coding
Synechococcus sp. M16.1	37	TG-AC	2	12	4	(TG)3-(AC)3	coding
Synechococcus sp. M16.1	38	C-G	2	14	4	(C)6-(G)8	coding
Synechococcus sp. M16.1	39	GCG-GC	2	15	2	(GCG)3-(GC)3	coding
Synechococcus sp. M16.1	40	GTC-GTG-GT	3	24	3	(GTC)3-(GTG)3-(GT)3	coding
Synechococcus sp. M16.1	41	GCC-TG	2	18	3	(GCC)4-(TG)3	coding
Synechococcus sp. M16.1	42	GC-CGCCAG	2	24	1	(GC)3-(CGCCAG)3	coding
Synechococcus sp. M16.1	43	CTG-G	2	15	4	(CTG)3-(G)6	noncoding
Synechococcus sp. M16.1	44	CG-GCT	2	15	6	(CG)3-(GCT)3	coding
Synechococcus sp. M16.1	45	AG-TGGA	2	18	1	(AG)3-(TGGA)3	coding
Synechococcus sp. M16.1	46	GT-AG	2	12	0	(GT)3-(AG)3	coding
Synechococcus sp. M16.1	47	GT-GT	2	12	7	(GT)3-(GT)3	noncoding
Synechococcus sp. M16.1	48	CAG-GCC	2	18	4	(CAG)3-(GCC)3	coding
Synechococcus sp. M16.1	49	CCA-GT	2	15	6	(CCA)3-(GT)3	coding
Synechococcus sp. M16.1	50	GCA-GC	2	15	1	(GCA)3-(GC)3	coding
Synechococcus sp. M16.1	51	G-AG	2	12	9	(G)6-(AG)3	coding
Synechococcus sp. M16.1	52	AG-AAC	2	15	5	(AG)3-(AAC)3	noncoding
Synechococcus sp. M16.1	53	T-CT	2	12	1	(T)6-(CT)3	noncoding
Synechococcus sp. M16.1	54	GATC-T	2	18	7	(GATC)3-(T)6	noncoding
Synechococcus sp. M16.1	55	CTG-TGC	2	24	1	(CTG)3-(TGC)5	coding
Synechococcus sp. M16.1	56	GC-G	2	12	9	(GC)3-(G)6	coding
Synechococcus sp. M16.1	57	GCA-TGG	2	18	5	(GCA)3-(TGG)3	coding
Synechococcus sp. M16.1	58	G-ACA	2	15	0	(G)6-(ACA)3	coding
Synechococcus sp. M16.1	59	CGA-CT	2	15	8	(CGA)3-(CT)3	coding
Synechococcus sp. M16.1	60	CT-G	2	12	0	(CT)3-(G)6	coding
Synechococcus sp. M16.1	61	G-CCG	2	16	8	(G)7-(CCG)3	coding
Synechococcus sp. M16.1	62	GC-TC	2	12	10	(GC)3-(TC)3	coding
Synechococcus sp. M16.1	63	TC-A	2	13	7	(TC)3-(A)7	coding
Synechococcus sp. M16.1	64	TCA-C	2	15	4	(TCA)3-(C)6	noncoding
Synechococcus sp. M16.1	65	GA-CT	2	12	3	(GA)3-(CT)3	coding
Synechococcus sp. M16.1	66	TGG-G	2	15	4	(TGG)3-(G)6	coding
Synechococcus sp. M16.1	67	GCG-TGC	2	18	1	(GCG)3-(TGC)3	coding
Synechococcus sp. M16.1	68	G-GTC	2	15	9	(G)6-(GTC)3	coding
Synechococcus sp. M16.1	69	GC-G	2	12	9	(GC)3-(G)6	coding
Synechococcus sp. M16.1	70	TC-CAA	2	15	0	(TC)3-(CAA)3	coding
Synechococcus sp. M16.1	71	CAG-A	2	17	7	(CAG)3-(A)8	coding
Synechococcus sp. M16.1	72	AG-A	2	13	5	(AG)3-(A)7	noncoding
Synechococcus sp. M16.1	73	GT-AGC	2	15	8	(GT)3-(AGC)3	coding
Synechococcus sp. M16.1	74	GGA-TGC	2	18	2	(GGA)3-(TGC)3	coding
Synechococcus sp. M16.1	75	CG-GGA	2	15	9	(CG)3-(GGA)3	coding
Synechococcus sp. M16.1	76	G-CT	2	12	7	(G)6-(CT)3	coding
Synechococcus sp. M16.1	77	CAG-GC	2	15	7	(CAG)3-(GC)3	coding
Synechococcus sp. M16.1	78	A-A	2	12	5	(A)6-(A)6	coding
Synechococcus sp. M16.1	79	A-AG	2	12	6	(A)6-(AG)3	noncoding
Synechococcus sp. M16.1	80	TGT-CAC	2	21	0	(TGT)3-(CAC)4	coding
Synechococcus sp. M16.1	81	A-G	2	14	0	(A)8-(G)6	noncoding
Synechococcus sp. M16.1	82	A-A	2	13	9	(A)6-(A)7	noncoding
Synechococcus sp. M16.1	83	A-A	2	13	9	(A)6-(A)7	noncoding
Synechococcus sp. M16.1	84	CTA-CA	2	15	3	(CTA)3-(CA)3	coding
Synechococcus sp. M16.1	85	T-A	2	13	4	(T)6-(A)7	noncoding
Synechococcus sp. M16.1	86	GCA-TGG	2	18	1	(GCA)3-(TGG)3	coding
Synechococcus sp. M16.1	87	AG-GA	2	12	5	(AG)3-(GA)3	noncoding
Synechococcus sp. M16.1	88	C-CT	2	13	2	(C)7-(CT)3	coding
Synechococcus sp. M16.1	89	CGA-GCA	2	18	0	(CGA)3-(GCA)3	coding
Synechococcus sp. M16.1	90	CAG-CAC	2	18	8	(CAG)3-(CAC)3	coding
Synechococcus sp. M16.1	91	CT-TGG	2	18	0	(CT)3-(TGG)4	coding
Synechococcus sp. M16.1	92	CA-A	2	12	0	(CA)3-(A)6	noncoding
Synechococcus sp. M16.1	93	G-C-T	3	18	7	(G)6-(C)6-(T)6	noncoding
Synechococcus sp. M16.1	94	AC-CAC	2	15	10	(AC)3-(CAC)3	coding
Synechococcus sp. M16.1	95	TG-GC	2	12	7	(TG)3-(GC)3	noncoding
Synechococcus sp. M16.1	96	GCT-CTG	2	18	4	(GCT)3-(CTG)3	coding
Synechococcus sp. M16.1	97	AC-GC	2	12	10	(AC)3-(GC)3	coding
Synechococcus sp. M16.1	98	GC-GCCA	2	18	3	(GC)3-(GCCA)3	coding
Synechococcus sp. M16.1	99	CGG-G	2	15	6	(CGG)3-(G)6	coding
Synechococcus sp. M16.1	100	CG-GCA	2	15	7	(CG)3-(GCA)3	coding
Synechococcus sp. M16.1	101	A-A	2	12	3	(A)6-(A)6	coding
Synechococcus sp. M16.1	102	CG-CA	2	12	0	(CG)3-(CA)3	coding
Synechococcus sp. M16.1	103	CA-C	2	12	9	(CA)3-(C)6	noncoding
Synechococcus sp. M16.1	104	G-TG	2	12	5	(G)6-(TG)3	coding
Synechococcus sp. M16.1	105	C-C	2	14	8	(C)7-(C)7	coding
Synechococcus sp. M16.1	106	C-CAG	2	15	5	(C)6-(CAG)3	coding
Synechococcus sp. M16.1	107	AC-C	2	12	2	(AC)3-(C)6	noncoding
Synechococcus sp. M16.1	108	AC-GGT	2	15	6	(AC)3-(GGT)3	coding
Synechococcus sp. M16.1	109	CGA-A	2	15	6	(CGA)3-(A)6	noncoding
Synechococcus sp. M16.1	110	AG-C	2	12	6	(AG)3-(C)6	noncoding
Synechococcus sp. M16.1	111	GCC-GCA	2	18	2	(GCC)3-(GCA)3	coding
Synechococcus sp. M16.1	112	C-CCG	2	15	3	(C)6-(CCG)3	coding
Synechococcus sp. M16.1	113	GC-GC	2	12	3	(GC)3-(GC)3	coding
Synechococcus sp. M16.1	114	AG-G	2	14	2	(AG)4-(G)6	noncoding
Synechococcus sp. M16.1	115	CCA-CTG	2	18	7	(CCA)3-(CTG)3	coding
Synechococcus sp. M16.1	116	CG-AC	2	12	3	(CG)3-(AC)3	noncoding
Synechococcus sp. M16.1	117	GCT-GCA	2	18	10	(GCT)3-(GCA)3	coding
Synechococcus sp. M16.1	118	GA-CAG	2	15	0	(GA)3-(CAG)3	coding
Synechococcus sp. M16.1	119	CGC-GCC	2	18	4	(CGC)3-(GCC)3	coding
Synechococcus sp. M16.1	120	CTG-GCG	2	21	10	(CTG)4-(GCG)3	coding
Synechococcus sp. M16.1	121	AGC-GA	2	15	7	(AGC)3-(GA)3	coding
Synechococcus sp. M16.1	122	GC-G	2	12	10	(GC)3-(G)6	coding
Synechococcus sp. M16.1	123	A-A	2	13	7	(A)6-(A)7	noncoding
Synechococcus sp. M16.1	124	A-A	2	13	10	(A)6-(A)7	coding
Synechococcus sp. M16.1	125	A-AG	2	12	2	(A)6-(AG)3	noncoding
Synechococcus sp. M16.1	126	GA-A	2	13	4	(GA)3-(A)7	coding
Synechococcus sp. M16.1	127	A-AT	2	12	4	(A)6-(AT)3	coding
Synechococcus sp. M16.1	128	A-T	2	12	7	(A)6-(T)6	coding
Synechococcus sp. M16.1	129	A-TA	2	12	6	(A)6-(TA)3	coding
Synechococcus sp. M16.1	130	AG-T	2	12	6	(AG)3-(T)6	coding
Synechococcus sp. M16.1	131	GC-GC	2	12	6	(GC)3-(GC)3	coding
Synechococcus sp. M16.1	132	CA-GC	2	12	0	(CA)3-(GC)3	noncoding
Synechococcus sp. M16.1	133	AT-AG	2	12	4	(AT)3-(AG)3	coding
Synechococcus sp. M16.1	134	T-T	2	12	2	(T)6-(T)6	coding
Synechococcus sp. M16.1	135	GGT-CGA	2	18	0	(GGT)3-(CGA)3	coding
Synechococcus sp. M16.1	136	CCG-CGG	2	18	7	(CCG)3-(CGG)3	coding
Synechococcus sp. M16.1	137	C-GC	2	12	4	(C)6-(GC)3	coding
Synechococcus sp. M16.1	138	CTG-GGA	2	18	8	(CTG)3-(GGA)3	coding
Synechococcus sp. M16.1	139	GGC-CG	2	15	7	(GGC)3-(CG)3	coding
Synechococcus sp. M16.1	140	TC-G	2	12	8	(TC)3-(G)6	coding
Synechococcus sp. M16.1	141	G-T	2	12	0	(G)6-(T)6	noncoding
Synechococcus sp. M16.1	142	CTC-CA	2	15	0	(CTC)3-(CA)3	coding
Synechococcus sp. M16.1	143	GT-TC	2	12	6	(GT)3-(TC)3	coding
Synechococcus sp. M16.1	144	CCA-AC	2	15	3	(CCA)3-(AC)3	coding
Synechococcus sp. M16.1	145	CA-GGT	2	15	0	(CA)3-(GGT)3	coding
Synechococcus sp. M16.1	146	C-GCC	2	18	0	(C)6-(GCC)4	coding
Synechococcus sp. M16.1	147	GC-CAG	2	15	1	(GC)3-(CAG)3	coding
Synechococcus sp. M16.1	148	GGC-GC	2	15	9	(GGC)3-(GC)3	coding
Synechococcus sp. M16.1	149	CG-CG	2	12	8	(CG)3-(CG)3	coding
Synechococcus sp. M16.1	150	TCT-GC	2	15	5	(TCT)3-(GC)3	coding
Synechococcus sp. M16.1	151	G-G	2	13	8	(G)6-(G)7	coding
Synechococcus sp. M16.1	152	GGA-CG	2	15	5	(GGA)3-(CG)3	coding
Synechococcus sp. M16.1	153	TC-GCA	2	15	0	(TC)3-(GCA)3	coding
Synechococcus sp. M16.1	154	CG-GA	2	12	9	(CG)3-(GA)3	coding
Synechococcus sp. M16.1	155	TGC-C	2	15	9	(TGC)3-(C)6	coding
Synechococcus sp. M16.1	156	GCA-GAA	2	18	2	(GCA)3-(GAA)3	coding
Synechococcus sp. M16.1	157	CG-CG	2	12	10	(CG)3-(CG)3	coding
Synechococcus sp. M16.1	158	CA-TC	2	12	9	(CA)3-(TC)3	coding
Synechococcus sp. M16.1	159	C-GC	2	12	3	(C)6-(GC)3	coding
Synechococcus sp. M16.1	160	A-A	2	13	2	(A)6-(A)7	noncoding
Synechococcus sp. M16.1	161	C-GCT	2	15	0	(C)6-(GCT)3	coding
Synechococcus sp. A15-44	1	T-T	2	12	1	(T)6-(T)6	noncoding
Synechococcus sp. A15-44	2	CGA-AG	2	15	10	(CGA)3-(AG)3	coding
Synechococcus sp. A15-44	3	GGC-GGT	2	21	6	(GGC)3-(GGT)4	coding
Synechococcus sp. A15-44	4	G-T	2	15	1	(G)7-(T)8	noncoding
Synechococcus sp. A15-44	5	A-CCA	2	15	8	(A)6-(CCA)3	coding
Synechococcus sp. A15-44	6	T-T	2	12	2	(T)6-(T)6	noncoding
Synechococcus sp. A15-44	7	GC-G	2	12	4	(GC)3-(G)6	coding
Synechococcus sp. A15-44	8	GTG-TTG	2	18	3	(GTG)3-(TTG)3	coding
Synechococcus sp. A15-44	9	T-A	2	12	6	(T)6-(A)6	coding
Synechococcus sp. A15-44	10	TGC-G	2	15	2	(TGC)3-(G)6	coding
Synechococcus sp. A15-44	11	G-TG	2	12	4	(G)6-(TG)3	coding
Synechococcus sp. A15-44	12	TC-T	2	12	5	(TC)3-(T)6	noncoding
Synechococcus sp. A15-44	13	GTT-ATA	2	18	4	(GTT)3-(ATA)3	coding
Synechococcus sp. A15-44	14	T-T	2	12	2	(T)6-(T)6	noncoding
Synechococcus sp. A15-44	15	AGG-T	2	19	10	(AGG)4-(T)7	noncoding
Synechococcus sp. A15-44	16	A-A	2	13	7	(A)6-(A)7	coding
Synechococcus sp. A15-44	17	CA-TC	2	12	2	(CA)3-(TC)3	coding
Synechococcus sp. A15-44	18	C-AC	2	12	6	(C)6-(AC)3	coding
Synechococcus sp. A15-44	19	CGG-CG	2	15	3	(CGG)3-(CG)3	coding
Synechococcus sp. A15-44	20	G-C-T	3	19	7	(G)6-(C)6-(T)7	noncoding
Synechococcus sp. A15-44	21	TG-TC	2	14	7	(TG)4-(TC)3	coding
Synechococcus sp. A15-44	22	GC-GGT	2	15	7	(GC)3-(GGT)3	coding
Synechococcus sp. A15-44	23	GT-TG	2	12	0	(GT)3-(TG)3	coding
Synechococcus sp. A15-44	24	CAC-GA	2	15	1	(CAC)3-(GA)3	coding
Synechococcus sp. A15-44	25	G-AG	2	12	0	(G)6-(AG)3	coding
Synechococcus sp. A15-44	26	CA-T	2	13	0	(CA)3-(T)7	coding
Synechococcus sp. A15-44	27	GA-TGT	2	15	9	(GA)3-(TGT)3	coding
Synechococcus sp. A15-44	28	ACC-T	2	15	1	(ACC)3-(T)6	coding
Synechococcus sp. A15-44	29	CAG-TG	2	15	7	(CAG)3-(TG)3	coding
Synechococcus sp. A15-44	30	GCT-G	2	16	0	(GCT)3-(G)7	coding
Synechococcus sp. A15-44	31	AG-G	2	12	6	(AG)3-(G)6	coding
Synechococcus sp. A15-44	32	C-AG	2	12	9	(C)6-(AG)3	coding
Synechococcus sp. A15-44	33	GC-A	2	12	2	(GC)3-(A)6	coding
Synechococcus sp. A15-44	34	CG-C	2	12	6	(CG)3-(C)6	coding
Synechococcus sp. A15-44	35	GA-CT	2	12	3	(GA)3-(CT)3	noncoding
Synechococcus sp. A15-44	36	GCA-C	2	15	3	(GCA)3-(C)6	coding
Synechococcus sp. A15-44	37	GC-C	2	12	7	(GC)3-(C)6	coding
Synechococcus sp. A15-44	38	CA-CT	2	12	5	(CA)3-(CT)3	coding
Synechococcus sp. A15-44	39	TGGA-GAAGG	2	32	1	(TGGA)3-(GAAGG)4	noncoding
Synechococcus sp. A15-44	40	CCA-GCA	2	18	8	(CCA)3-(GCA)3	coding
Synechococcus sp. A15-44	41	A-A	2	12	9	(A)6-(A)6	coding
Synechococcus sp. A15-44	42	C-CCA	2	15	1	(C)6-(CCA)3	coding
Synechococcus sp. A15-44	43	CT-TGC	2	15	1	(CT)3-(TGC)3	coding
Synechococcus sp. A15-44	44	TGG-GT	2	15	4	(TGG)3-(GT)3	coding
Synechococcus sp. A15-44	45	TCC-TC	2	18	7	(TCC)4-(TC)3	coding
Synechococcus sp. A15-44	46	A-T	2	13	8	(A)6-(T)7	coding
Synechococcus sp. A15-44	47	GC-GCA	2	15	5	(GC)3-(GCA)3	coding
Synechococcus sp. A15-44	48	C-TC	2	12	1	(C)6-(TC)3	coding
Synechococcus sp. A15-44	49	TG-AC	2	12	4	(TG)3-(AC)3	coding
Synechococcus sp. A15-44	50	C-G	2	13	4	(C)6-(G)7	noncoding
Synechococcus sp. A15-44	51	GCG-GC	2	15	2	(GCG)3-(GC)3	coding
Synechococcus sp. A15-44	52	TG-GTG	2	15	7	(TG)3-(GTG)3	coding
Synechococcus sp. A15-44	53	GC-A	2	13	5	(GC)3-(A)7	coding
Synechococcus sp. A15-44	54	GCA-TG	2	15	6	(GCA)3-(TG)3	coding
Synechococcus sp. A15-44	55	G-GCCGA	2	21	7	(G)6-(GCCGA)3	noncoding
Synechococcus sp. A15-44	56	T-T-CT	3	18	15	(T)6-(T)6-(CT)3	noncoding
Synechococcus sp. A15-44	57	T-AT	2	12	8	(T)6-(AT)3	noncoding
Synechococcus sp. A15-44	58	T-CT	2	15	7	(T)7-(CT)4	coding
Synechococcus sp. A15-44	59	T-TTC	2	15	10	(T)6-(TTC)3	coding
Synechococcus sp. A15-44	60	CT-GCG	2	15	3	(CT)3-(GCG)3	noncoding
Synechococcus sp. A15-44	61	CG-GCT	2	15	6	(CG)3-(GCT)3	coding
Synechococcus sp. A15-44	62	A-GC	2	12	5	(A)6-(GC)3	noncoding
Synechococcus sp. A15-44	63	T-GCT	2	15	8	(T)6-(GCT)3	coding
Synechococcus sp. A15-44	64	CT-TC	2	14	2	(CT)4-(TC)3	coding
Synechococcus sp. A15-44	65	G-CG	2	12	8	(G)6-(CG)3	coding
Synechococcus sp. A15-44	66	CG-GC	2	12	2	(CG)3-(GC)3	coding
Synechococcus sp. A15-44	67	ACC-ACC	2	18	6	(ACC)3-(ACC)3	coding
Synechococcus sp. A15-44	68	TC-TGGA	2	18	0	(TC)3-(TGGA)3	coding
Synechococcus sp. A15-44	69	AG-AAC	2	15	5	(AG)3-(AAC)3	noncoding
Synechococcus sp. A15-44	70	TG-TG-TG	3	18	11	(TG)3-(TG)3-(TG)3	noncoding
Synechococcus sp. A15-44	71	A-C	2	13	3	(A)7-(C)6	noncoding
Synechococcus sp. A15-44	72	T-T	2	13	2	(T)7-(T)6	coding
Synechococcus sp. A15-44	73	T-GC	2	12	0	(T)6-(GC)3	noncoding
Synechococcus sp. A15-44	74	T-CT	2	12	10	(T)6-(CT)3	coding
Synechococcus sp. A15-44	75	GC-GC	2	14	10	(GC)3-(GC)4	coding
Synechococcus sp. A15-44	76	C-CGC	2	15	4	(C)6-(CGC)3	coding
Synechococcus sp. A15-44	77	CCA-GCA	2	18	6	(CCA)3-(GCA)3	coding
Synechococcus sp. A15-44	78	CTG-CTG	2	18	9	(CTG)3-(CTG)3	coding
Synechococcus sp. A15-44	79	CGC-GA	2	15	1	(CGC)3-(GA)3	coding
Synechococcus sp. A15-44	80	T-T	2	14	4	(T)8-(T)6	noncoding
Synechococcus sp. A15-44	81	G-C	2	17	3	(G)6-(C)11	noncoding
Synechococcus sp. A15-44	82	GC-G	2	12	9	(GC)3-(G)6	coding
Synechococcus sp. A15-44	83	GCA-TGG	2	18	5	(GCA)3-(TGG)3	coding
Synechococcus sp. A15-44	84	G-ACA	2	15	0	(G)6-(ACA)3	coding
Synechococcus sp. A15-44	85	G-CCG	2	17	7	(G)8-(CCG)3	coding
Synechococcus sp. A15-44	86	GC-TC	2	12	10	(GC)3-(TC)3	coding
Synechococcus sp. A15-44	87	CT-A	2	14	1	(CT)4-(A)6	coding
Synechococcus sp. A15-44	88	TCA-C	2	15	4	(TCA)3-(C)6	noncoding
Synechococcus sp. A15-44	89	TGG-G	2	15	4	(TGG)3-(G)6	coding
Synechococcus sp. A15-44	90	GCG-TGC	2	18	1	(GCG)3-(TGC)3	coding
Synechococcus sp. A15-44	91	GC-TG	2	12	0	(GC)3-(TG)3	coding
Synechococcus sp. A15-44	92	C-CG	2	12	5	(C)6-(CG)3	coding
Synechococcus sp. A15-44	93	G-GTC	2	15	9	(G)6-(GTC)3	coding
Synechococcus sp. A15-44	94	GC-G	2	12	9	(GC)3-(G)6	coding
Synechococcus sp. A15-44	95	TC-CAA	2	15	0	(TC)3-(CAA)3	coding
Synechococcus sp. A15-44	96	CAG-A	2	17	7	(CAG)3-(A)8	coding
Synechococcus sp. A15-44	97	AG-A	2	12	5	(AG)3-(A)6	noncoding
Synechococcus sp. A15-44	98	GGA-TGC	2	18	2	(GGA)3-(TGC)3	coding
Synechococcus sp. A15-44	99	CAG-GC	2	15	7	(CAG)3-(GC)3	coding
Synechococcus sp. A15-44	100	A-A	2	12	5	(A)6-(A)6	coding
Synechococcus sp. A15-44	101	GC-G	2	12	2	(GC)3-(G)6	coding
Synechococcus sp. A15-44	102	TC-GA	2	12	5	(TC)3-(GA)3	coding
Synechococcus sp. A15-44	103	A-T	2	14	9	(A)7-(T)7	coding
Synechococcus sp. A15-44	104	AG-TG	2	12	1	(AG)3-(TG)3	coding
Synechococcus sp. A15-44	105	T-TG	2	12	7	(T)6-(TG)3	noncoding
Synechococcus sp. A15-44	106	GT-CT	2	12	0	(GT)3-(CT)3	coding
Synechococcus sp. A15-44	107	T-T	2	13	2	(T)7-(T)6	noncoding
Synechococcus sp. A15-44	108	A-AG	2	12	6	(A)6-(AG)3	noncoding
Synechococcus sp. A15-44	109	CT-C	2	12	0	(CT)3-(C)6	noncoding
Synechococcus sp. A15-44	110	A-GA	2	12	1	(A)6-(GA)3	coding
Synechococcus sp. A15-44	111	AC-CA	2	12	8	(AC)3-(CA)3	noncoding
Synechococcus sp. A15-44	112	T-A	2	14	2	(T)7-(A)7	noncoding
Synechococcus sp. A15-44	113	GA-CCA	2	15	4	(GA)3-(CCA)3	coding
Synechococcus sp. A15-44	114	CGC-AGC	2	18	0	(CGC)3-(AGC)3	coding
Synechococcus sp. A15-44	115	C-CT	2	13	2	(C)7-(CT)3	coding
Synechococcus sp. A15-44	116	AG-AC	2	14	5	(AG)4-(AC)3	coding
Synechococcus sp. A15-44	117	CGA-GCA	2	18	0	(CGA)3-(GCA)3	coding
Synechococcus sp. A15-44	118	AG-TG	2	12	1	(AG)3-(TG)3	coding
Synechococcus sp. A15-44	119	G-T	2	14	1	(G)8-(T)6	noncoding
Synechococcus sp. A15-44	120	A-G-C-T	4	24	8	(A)6-(G)6-(C)6-(T)6	noncoding
Synechococcus sp. A15-44	121	AC-CAC	2	15	10	(AC)3-(CAC)3	coding
Synechococcus sp. A15-44	122	TG-GC	2	12	7	(TG)3-(GC)3	noncoding
Synechococcus sp. A15-44	123	GCT-CTG	2	24	4	(GCT)5-(CTG)3	coding
Synechococcus sp. A15-44	124	A-G-C	3	18	8	(A)6-(G)6-(C)6	noncoding
Synechococcus sp. A15-44	125	AC-GC	2	12	10	(AC)3-(GC)3	coding
Synechococcus sp. A15-44	126	CGG-GCA	2	18	4	(CGG)3-(GCA)3	coding
Synechococcus sp. A15-44	127	CGG-G	2	15	6	(CGG)3-(G)6	coding
Synechococcus sp. A15-44	128	CG-GCA	2	18	7	(CG)3-(GCA)4	coding
Synechococcus sp. A15-44	129	CA-CA	2	12	9	(CA)3-(CA)3	coding
Synechococcus sp. A15-44	130	A-A	2	12	3	(A)6-(A)6	coding
Synechococcus sp. A15-44	131	CTG-TGC-G	3	24	2	(CTG)3-(TGC)3-(G)6	coding
Synechococcus sp. A15-44	132	G-TGG	2	15	3	(G)6-(TGG)3	coding
Synechococcus sp. A15-44	133	G-GA	2	12	8	(G)6-(GA)3	coding
Synechococcus sp. A15-44	134	CA-C	2	12	9	(CA)3-(C)6	noncoding
Synechococcus sp. A15-44	135	GC-TG	2	12	0	(GC)3-(TG)3	coding
Synechococcus sp. A15-44	136	CA-TGC	2	15	5	(CA)3-(TGC)3	coding
Synechococcus sp. A15-44	137	C-C	2	14	8	(C)7-(C)7	coding
Synechococcus sp. A15-44	138	CT-CT	2	12	1	(CT)3-(CT)3	coding
Synechococcus sp. A15-44	139	G-TGC	2	18	1	(G)9-(TGC)3	coding
Synechococcus sp. A15-44	140	C-CAG	2	15	5	(C)6-(CAG)3	coding
Synechococcus sp. A15-44	141	GC-GA	2	12	8	(GC)3-(GA)3	coding
Synechococcus sp. A15-44	142	A-G	2	12	10	(A)6-(G)6	coding
Synechococcus sp. A15-44	143	AC-GGT	2	15	6	(AC)3-(GGT)3	coding
Synechococcus sp. A15-44	144	CGA-A	2	15	6	(CGA)3-(A)6	noncoding
Synechococcus sp. A15-44	145	GCC-CAG	2	18	6	(GCC)3-(CAG)3	coding
Synechococcus sp. A15-44	146	AG-C	2	12	6	(AG)3-(C)6	noncoding
Synechococcus sp. A15-44	147	A-CA	2	12	5	(A)6-(CA)3	coding
Synechococcus sp. A15-44	148	GCC-GCA	2	18	2	(GCC)3-(GCA)3	coding
Synechococcus sp. A15-44	149	C-CCG	2	15	3	(C)6-(CCG)3	coding
Synechococcus sp. A15-44	150	GC-GC	2	12	3	(GC)3-(GC)3	coding
Synechococcus sp. A15-44	151	TGC-TGC	2	18	3	(TGC)3-(TGC)3	coding
Synechococcus sp. A15-44	152	GA-G	2	12	3	(GA)3-(G)6	noncoding
Synechococcus sp. A15-44	153	GGT-GCC	2	18	9	(GGT)3-(GCC)3	coding
Synechococcus sp. A15-44	154	CT-TC	2	12	5	(CT)3-(TC)3	coding
Synechococcus sp. A15-44	155	TA-A	2	12	10	(TA)3-(A)6	noncoding
Synechococcus sp. A15-44	156	CA-CT	2	12	1	(CA)3-(CT)3	coding
Synechococcus sp. A15-44	157	CGA-GCA	2	18	4	(CGA)3-(GCA)3	coding
Synechococcus sp. A15-44	158	GA-GC	2	14	5	(GA)3-(GC)4	noncoding
Synechococcus sp. A15-44	159	GA-GC	2	14	5	(GA)3-(GC)4	noncoding
Synechococcus sp. A15-44	160	C-AG	2	12	8	(C)6-(AG)3	coding
Synechococcus sp. A15-44	161	TGGA-GAAGG	2	37	1	(TGGA)3-(GAAGG)5	noncoding
Synechococcus sp. A15-44	162	GGC-CGA	2	21	3	(GGC)3-(CGA)4	coding
Synechococcus sp. A15-44	163	CG-AC	2	12	1	(CG)3-(AC)3	noncoding
Synechococcus sp. A15-44	164	AC-CGT	2	15	6	(AC)3-(CGT)3	coding
Synechococcus sp. A15-44	165	GCA-CAA	2	18	8	(GCA)3-(CAA)3	coding
Synechococcus sp. A15-44	166	TCG-GGC	2	18	2	(TCG)3-(GGC)3	coding
Synechococcus sp. A15-44	167	CG-AG	2	12	7	(CG)3-(AG)3	coding
Synechococcus sp. A15-44	168	CGC-GCC	2	18	4	(CGC)3-(GCC)3	coding
Synechococcus sp. A15-44	169	CTG-GCG	2	21	10	(CTG)4-(GCG)3	coding
Synechococcus sp. A15-44	170	GCT-CAG	2	21	7	(GCT)3-(CAG)4	noncoding
Synechococcus sp. A15-44	171	GA-G	2	13	6	(GA)3-(G)7	coding
Synechococcus sp. A15-44	172	TGC-G	2	15	1	(TGC)3-(G)6	coding
Synechococcus sp. A15-44	173	A-AT	2	13	3	(A)7-(AT)3	noncoding
Synechococcus sp. A15-44	174	A-A	2	12	8	(A)6-(A)6	coding
Synechococcus sp. A15-44	175	TA-T	2	12	1	(TA)3-(T)6	coding
Synechococcus sp. A15-44	176	GGC-CAC	2	18	3	(GGC)3-(CAC)3	coding
Synechococcus sp. A15-44	177	AG-G	2	17	0	(AG)5-(G)7	noncoding
Synechococcus sp. A15-44	178	GC-GA	2	12	7	(GC)3-(GA)3	coding
Synechococcus sp. A15-44	179	GC-C	2	12	8	(GC)3-(C)6	coding
Synechococcus sp. A15-44	180	CG-GCC	2	15	0	(CG)3-(GCC)3	coding
Synechococcus sp. A15-44	181	CT-AC	2	12	10	(CT)3-(AC)3	coding
Synechococcus sp. A15-44	182	T-CA	2	12	1	(T)6-(CA)3	coding
Synechococcus sp. A15-44	183	TG-C	2	12	4	(TG)3-(C)6	coding
Synechococcus sp. A15-44	184	GGT-CGA	2	18	0	(GGT)3-(CGA)3	coding
Synechococcus sp. A15-44	185	C-GC	2	12	4	(C)6-(GC)3	coding
Synechococcus sp. A15-44	186	CTG-GGA	2	18	8	(CTG)3-(GGA)3	coding
Synechococcus sp. A15-44	187	CG-CTG	2	15	2	(CG)3-(CTG)3	coding
Synechococcus sp. A15-44	188	GGT-CT	2	15	4	(GGT)3-(CT)3	coding
Synechococcus sp. A15-44	189	CGG-C	2	15	4	(CGG)3-(C)6	coding
Synechococcus sp. A15-44	190	GGC-CG	2	15	7	(GGC)3-(CG)3	coding
Synechococcus sp. A15-44	191	TC-G	2	12	8	(TC)3-(G)6	coding
Synechococcus sp. A15-44	192	C-CTG	2	15	4	(C)6-(CTG)3	coding
Synechococcus sp. A15-44	193	G-T	2	12	0	(G)6-(T)6	noncoding
Synechococcus sp. A15-44	194	AGC-CCA	2	18	10	(AGC)3-(CCA)3	coding
Synechococcus sp. A15-44	195	CG-CAA	2	15	4	(CG)3-(CAA)3	coding
Synechococcus sp. A15-44	196	C-GCC	2	18	0	(C)6-(GCC)4	coding
Synechococcus sp. A15-44	197	GC-CAG	2	15	1	(GC)3-(CAG)3	coding
Synechococcus sp. A15-44	198	GGC-GC	2	15	9	(GGC)3-(GC)3	coding
Synechococcus sp. A15-44	199	GGA-CG	2	15	5	(GGA)3-(CG)3	coding
Synechococcus sp. A15-44	200	CAG-GC	2	15	10	(CAG)3-(GC)3	coding
Synechococcus sp. A15-44	201	CG-CG	2	12	10	(CG)3-(CG)3	coding
Synechococcus sp. A15-44	202	C-TG	2	12	5	(C)6-(TG)3	coding
Synechococcus sp. A15-44	203	TGA-A	2	15	4	(TGA)3-(A)6	coding
Synechococcus sp. A15-44	204	CG-AG	2	12	8	(CG)3-(AG)3	coding
Synechococcus sp. A15-44	205	GA-AGC	2	15	7	(GA)3-(AGC)3	coding
Synechococcus sp. A15-44	206	C-GC	2	13	3	(C)7-(GC)3	coding
Synechococcus sp. A15-44	207	G-CG	2	12	4	(G)6-(CG)3	coding
Synechococcus sp. A15-44	208	CT-A	2	13	7	(CT)3-(A)7	noncoding
Synechococcus sp. A15-44	209	T-T	2	12	9	(T)6-(T)6	noncoding
Synechococcus sp. A15-44	210	G-ACC	2	16	0	(G)7-(ACC)3	coding
Synechococcus sp. A15-44	211	A-A	2	13	2	(A)6-(A)7	noncoding
Synechococcus sp. A15-62	1	T-T	2	12	1	(T)6-(T)6	noncoding
Synechococcus sp. A15-62	2	C-GGC-GGC-GGT	4	33	11	(C)6-(GGC)3-(GGC)3-(GGT)3	coding
Synechococcus sp. A15-62	3	GGC-GGC	2	21	3	(GGC)3-(GGC)4	coding
Synechococcus sp. A15-62	4	G-T	2	15	1	(G)7-(T)8	noncoding
Synechococcus sp. A15-62	5	AG-T	2	12	1	(AG)3-(T)6	coding
Synechococcus sp. A15-62	6	G-C	2	12	5	(G)6-(C)6	noncoding
Synechococcus sp. A15-62	7	GC-GCG	2	17	2	(GC)4-(GCG)3	coding
Synechococcus sp. A15-62	8	GGC-CCA	2	18	9	(GGC)3-(CCA)3	coding
Synechococcus sp. A15-62	9	CG-TCT	2	17	2	(CG)4-(TCT)3	coding
Synechococcus sp. A15-62	10	GCT-TGG	2	18	7	(GCT)3-(TGG)3	coding
Synechococcus sp. A15-62	11	TC-GC	2	12	2	(TC)3-(GC)3	coding
Synechococcus sp. A15-62	12	GT-A	2	12	6	(GT)3-(A)6	noncoding
Synechococcus sp. A15-62	13	G-AG	2	12	5	(G)6-(AG)3	coding
Synechococcus sp. A15-62	14	TC-TG	2	12	4	(TC)3-(TG)3	coding
Synechococcus sp. A15-62	15	TGC-CAG	2	18	4	(TGC)3-(CAG)3	coding
Synechococcus sp. A15-62	16	TC-A	2	12	8	(TC)3-(A)6	coding
Synechococcus sp. A15-62	17	T-T	2	12	6	(T)6-(T)6	coding
Synechococcus sp. A15-62	18	GT-CT	2	12	4	(GT)3-(CT)3	coding
Synechococcus sp. A15-62	19	AC-C	2	12	2	(AC)3-(C)6	coding
Synechococcus sp. A15-62	20	AGC-CAG	2	18	2	(AGC)3-(CAG)3	coding
Synechococcus sp. A15-62	21	GGC-T	2	15	0	(GGC)3-(T)6	coding
Synechococcus sp. A15-62	22	GCG-CG	2	15	1	(GCG)3-(CG)3	coding
Synechococcus sp. A15-62	23	GTG-GCT	2	18	8	(GTG)3-(GCT)3	coding
Synechococcus sp. A15-62	24	T-GA	2	12	4	(T)6-(GA)3	coding
Synechococcus sp. A15-62	25	CAG-CGG	2	18	0	(CAG)3-(CGG)3	coding
Synechococcus sp. A15-62	26	GT-TG	2	12	0	(GT)3-(TG)3	coding
Synechococcus sp. A15-62	27	TC-GC	2	12	2	(TC)3-(GC)3	coding
Synechococcus sp. A15-62	28	CAC-GA	2	15	1	(CAC)3-(GA)3	coding
Synechococcus sp. A15-62	29	G-AG	2	12	0	(G)6-(AG)3	coding
Synechococcus sp. A15-62	30	CA-T	2	13	0	(CA)3-(T)7	coding
Synechococcus sp. A15-62	31	ACC-T	2	15	1	(ACC)3-(T)6	coding
Synechococcus sp. A15-62	32	CAG-TG	2	15	7	(CAG)3-(TG)3	coding
Synechococcus sp. A15-62	33	GCT-G	2	16	0	(GCT)3-(G)7	coding
Synechococcus sp. A15-62	34	C-AG	2	12	9	(C)6-(AG)3	coding
Synechococcus sp. A15-62	35	G-G	2	12	2	(G)6-(G)6	coding
Synechococcus sp. A15-62	36	A-C-G	3	19	3	(A)7-(C)6-(G)6	noncoding
Synechococcus sp. A15-62	37	G-C-T	3	19	10	(G)6-(C)6-(T)7	noncoding
Synechococcus sp. A15-62	38	AG-AT	2	12	8	(AG)3-(AT)3	coding
Synechococcus sp. A15-62	39	CT-A	2	13	5	(CT)3-(A)7	noncoding
Synechococcus sp. A15-62	40	T-TG	2	12	10	(T)6-(TG)3	coding
Synechococcus sp. A15-62	41	GCA-C	2	15	3	(GCA)3-(C)6	coding
Synechococcus sp. A15-62	42	CCG-C	2	15	1	(CCG)3-(C)6	coding
Synechococcus sp. A15-62	43	TG-G	2	12	8	(TG)3-(G)6	noncoding
Synechococcus sp. A15-62	44	CG-TC	2	12	0	(CG)3-(TC)3	coding
Synechococcus sp. A15-62	45	GTT-G	2	15	0	(GTT)3-(G)6	coding
Synechococcus sp. A15-62	46	GTG-C	2	15	2	(GTG)3-(C)6	coding
Synechococcus sp. A15-62	47	TGT-AG	2	15	6	(TGT)3-(AG)3	coding
Synechococcus sp. A15-62	48	C-G	2	12	4	(C)6-(G)6	coding
Synechococcus sp. A15-62	49	GA-GCT	2	15	7	(GA)3-(GCT)3	coding
Synechococcus sp. A15-62	50	GA-AGC	2	15	0	(GA)3-(AGC)3	coding
Synechococcus sp. A15-62	51	GTC-CG	2	15	3	(GTC)3-(CG)3	coding
Synechococcus sp. A15-62	52	GCC-TG	2	18	3	(GCC)4-(TG)3	coding
Synechococcus sp. A15-62	53	CTG-GTG	2	18	0	(CTG)3-(GTG)3	coding
Synechococcus sp. A15-62	54	A-A	2	13	6	(A)7-(A)6	coding
Synechococcus sp. A15-62	55	A-A	2	13	9	(A)6-(A)7	coding
Synechococcus sp. A15-62	56	GA-A	2	12	2	(GA)3-(A)6	coding
Synechococcus sp. A15-62	57	C-TC	2	12	1	(C)6-(TC)3	coding
Synechococcus sp. A15-62	58	CT-TG	2	12	4	(CT)3-(TG)3	coding
Synechococcus sp. A15-62	59	A-AG	2	12	9	(A)6-(AG)3	coding
Synechococcus sp. A15-62	60	G-T	2	13	3	(G)6-(T)7	noncoding
Synechococcus sp. A15-62	61	CCA-C	2	16	9	(CCA)3-(C)7	coding
Synechococcus sp. A15-62	62	G-AG	2	12	9	(G)6-(AG)3	coding
Synechococcus sp. A15-62	63	C-CT	2	12	7	(C)6-(CT)3	coding
Synechococcus sp. A15-62	64	GATC-T	2	18	7	(GATC)3-(T)6	noncoding
Synechococcus sp. A15-62	65	CCA-GCA	2	18	6	(CCA)3-(GCA)3	coding
Synechococcus sp. A15-62	66	C-CG	2	12	3	(C)6-(CG)3	coding
Synechococcus sp. A15-62	67	AT-TA	2	12	3	(AT)3-(TA)3	coding
Synechococcus sp. A15-62	68	GAT-T	2	17	2	(GAT)3-(T)8	coding
Synechococcus sp. A15-62	69	GC-G	2	12	9	(GC)3-(G)6	coding
Synechococcus sp. A15-62	70	AGC-TGG	2	24	3	(AGC)5-(TGG)3	coding
Synechococcus sp. A15-62	71	A-CT	2	13	7	(A)7-(CT)3	noncoding
Synechococcus sp. A15-62	72	G-ACA	2	15	0	(G)6-(ACA)3	coding
Synechococcus sp. A15-62	73	CT-G	2	12	0	(CT)3-(G)6	coding
Synechococcus sp. A15-62	74	GA-C	2	13	8	(GA)3-(C)7	coding
Synechococcus sp. A15-62	75	AG-CT	2	12	4	(AG)3-(CT)3	coding
Synechococcus sp. A15-62	76	CT-CTG	2	15	5	(CT)3-(CTG)3	coding
Synechococcus sp. A15-62	77	G-A	2	12	1	(G)6-(A)6	coding
Synechococcus sp. A15-62	78	GC-CTG	2	15	2	(GC)3-(CTG)3	coding
Synechococcus sp. A15-62	79	CAG-CT	2	15	7	(CAG)3-(CT)3	coding
Synechococcus sp. A15-62	80	TC-CG	2	12	10	(TC)3-(CG)3	coding
Synechococcus sp. A15-62	81	C-CG	2	12	5	(C)6-(CG)3	coding
Synechococcus sp. A15-62	82	C-TGC	2	16	0	(C)7-(TGC)3	coding
Synechococcus sp. A15-62	83	CGG-GGC	2	18	1	(CGG)3-(GGC)3	coding
Synechococcus sp. A15-62	84	GC-G	2	13	8	(GC)3-(G)7	coding
Synechococcus sp. A15-62	85	TG-GCC	2	15	0	(TG)3-(GCC)3	coding
Synechococcus sp. A15-62	86	AG-GCA	2	15	2	(AG)3-(GCA)3	coding
Synechococcus sp. A15-62	87	GAG-TGC	2	18	1	(GAG)3-(TGC)3	coding
Synechococcus sp. A15-62	88	CAC-AAG	2	18	9	(CAC)3-(AAG)3	coding
Synechococcus sp. A15-62	89	GGT-T	2	16	6	(GGT)3-(T)7	coding
Synechococcus sp. A15-62	90	TGT-C	2	15	8	(TGT)3-(C)6	coding
Synechococcus sp. A15-62	91	A-CAA	2	16	3	(A)7-(CAA)3	coding
Synechococcus sp. A15-62	92	AG-A	2	13	4	(AG)3-(A)7	noncoding
Synechococcus sp. A15-62	93	A-GT	2	13	2	(A)7-(GT)3	noncoding
Synechococcus sp. A15-62	94	A-GA	2	12	1	(A)6-(GA)3	coding
Synechococcus sp. A15-62	95	AC-CA	2	14	6	(AC)3-(CA)4	noncoding
Synechococcus sp. A15-62	96	T-A	2	13	8	(T)6-(A)7	noncoding
Synechococcus sp. A15-62	97	G-T	2	12	0	(G)6-(T)6	noncoding
Synechococcus sp. A15-62	98	GC-CTG	2	15	4	(GC)3-(CTG)3	coding
Synechococcus sp. A15-62	99	GCA-TGG	2	18	1	(GCA)3-(TGG)3	coding
Synechococcus sp. A15-62	100	GA-CCA	2	18	4	(GA)3-(CCA)4	coding
Synechococcus sp. A15-62	101	TA-A	2	12	6	(TA)3-(A)6	noncoding
Synechococcus sp. A15-62	102	A-CT	2	13	8	(A)7-(CT)3	noncoding
Synechococcus sp. A15-62	103	CGA-GCA	2	18	0	(CGA)3-(GCA)3	coding
Synechococcus sp. A15-62	104	CAG-CAC-GC	3	24	13	(CAG)3-(CAC)3-(GC)3	coding
Synechococcus sp. A15-62	105	AC-CA	2	14	9	(AC)3-(CA)4	noncoding
Synechococcus sp. A15-62	106	C-A	2	12	9	(C)6-(A)6	noncoding
Synechococcus sp. A15-62	107	A-A	2	13	2	(A)7-(A)6	noncoding
Synechococcus sp. A15-62	108	A-AG	2	12	10	(A)6-(AG)3	noncoding
Synechococcus sp. A15-62	109	A-T	2	13	0	(A)6-(T)7	coding
Synechococcus sp. A15-62	110	CA-CT	2	12	8	(CA)3-(CT)3	noncoding
Synechococcus sp. A15-62	111	CA-CT	2	12	8	(CA)3-(CT)3	noncoding
Synechococcus sp. A15-62	112	GA-A	2	12	0	(GA)3-(A)6	noncoding
Synechococcus sp. A15-62	113	A-CA	2	12	7	(A)6-(CA)3	noncoding
Synechococcus sp. A15-62	114	TC-CCCAA	2	21	9	(TC)3-(CCCAA)3	noncoding
Synechococcus sp. A15-62	115	G-G	2	13	2	(G)7-(G)6	coding
Synechococcus sp. A15-62	116	CAG-AGC	2	21	7	(CAG)3-(AGC)4	coding
Synechococcus sp. A15-62	117	AC-CAC	2	15	10	(AC)3-(CAC)3	coding
Synechococcus sp. A15-62	118	TG-GC	2	12	7	(TG)3-(GC)3	noncoding
Synechococcus sp. A15-62	119	C-GC-GCC-CTG	4	35	18	(C)6-(GC)4-(GCC)3-(CTG)4	coding
Synechococcus sp. A15-62	120	GCT-CTG	2	18	4	(GCT)3-(CTG)3	coding
Synechococcus sp. A15-62	121	CCA-CGT	2	18	0	(CCA)3-(CGT)3	coding
Synechococcus sp. A15-62	122	CAG-GGC	2	18	0	(CAG)3-(GGC)3	coding
Synechococcus sp. A15-62	123	GCG-GCA	2	18	5	(GCG)3-(GCA)3	coding
Synechococcus sp. A15-62	124	CGG-G	2	15	6	(CGG)3-(G)6	coding
Synechococcus sp. A15-62	125	CG-GCA	2	18	7	(CG)3-(GCA)4	coding
Synechococcus sp. A15-62	126	A-A-A	3	18	12	(A)6-(A)6-(A)6	coding
Synechococcus sp. A15-62	127	CTG-TGC	2	18	1	(CTG)3-(TGC)3	coding
Synechococcus sp. A15-62	128	G-TGG	2	15	3	(G)6-(TGG)3	coding
Synechococcus sp. A15-62	129	CA-C	2	12	9	(CA)3-(C)6	noncoding
Synechococcus sp. A15-62	130	G-TG	2	12	5	(G)6-(TG)3	coding
Synechococcus sp. A15-62	131	AG-TC	2	12	3	(AG)3-(TC)3	coding
Synechococcus sp. A15-62	132	GA-C	2	12	2	(GA)3-(C)6	coding
Synechococcus sp. A15-62	133	CA-GCT	2	15	0	(CA)3-(GCT)3	coding
Synechococcus sp. A15-62	134	C-C	2	14	8	(C)7-(C)7	coding
Synechococcus sp. A15-62	135	AT-T	2	12	4	(AT)3-(T)6	coding
Synechococcus sp. A15-62	136	C-CG	2	12	10	(C)6-(CG)3	coding
Synechococcus sp. A15-62	137	C-CAG	2	15	5	(C)6-(CAG)3	coding
Synechococcus sp. A15-62	138	A-GA	2	12	3	(A)6-(GA)3	coding
Synechococcus sp. A15-62	139	TGC-TG	2	15	8	(TGC)3-(TG)3	coding
Synechococcus sp. A15-62	140	GCA-CAG	2	18	4	(GCA)3-(CAG)3	coding
Synechococcus sp. A15-62	141	C-CA	2	12	3	(C)6-(CA)3	noncoding
Synechococcus sp. A15-62	142	CAA-A	2	16	4	(CAA)3-(A)7	coding
Synechococcus sp. A15-62	143	GCC-GCA	2	18	2	(GCC)3-(GCA)3	coding
Synechococcus sp. A15-62	144	GC-CG-GGC	3	21	6	(GC)3-(CG)3-(GGC)3	coding
Synechococcus sp. A15-62	145	AGC-CTG	2	21	1	(AGC)3-(CTG)4	coding
Synechococcus sp. A15-62	146	A-CT	2	12	0	(A)6-(CT)3	coding
Synechococcus sp. A15-62	147	AG-G	2	14	2	(AG)4-(G)6	noncoding
Synechococcus sp. A15-62	148	CCA-CTG	2	18	7	(CCA)3-(CTG)3	coding
Synechococcus sp. A15-62	149	TCG-GGC	2	18	2	(TCG)3-(GGC)3	coding
Synechococcus sp. A15-62	150	CTC-AG	2	15	0	(CTC)3-(AG)3	coding
Synechococcus sp. A15-62	151	A-CT-A	3	18	13	(A)6-(CT)3-(A)6	coding
Synechococcus sp. A15-62	152	CGC-GCC	2	18	4	(CGC)3-(GCC)3	coding
Synechococcus sp. A15-62	153	T-T-T	3	19	12	(T)6-(T)6-(T)7	coding
Synechococcus sp. A15-62	154	GA-G	2	13	6	(GA)3-(G)7	coding
Synechococcus sp. A15-62	155	C-T	2	12	3	(C)6-(T)6	coding
Synechococcus sp. A15-62	156	T-CT	2	12	0	(T)6-(CT)3	noncoding
Synechococcus sp. A15-62	157	GGT-CGA	2	18	0	(GGT)3-(CGA)3	coding
Synechococcus sp. A15-62	158	AC-CA	2	12	6	(AC)3-(CA)3	noncoding
Synechococcus sp. A15-62	159	GA-T	2	14	8	(GA)4-(T)6	coding
Synechococcus sp. A15-62	160	A-GA	2	13	0	(A)7-(GA)3	noncoding
Synechococcus sp. A15-62	161	CTG-GGA	2	18	8	(CTG)3-(GGA)3	coding
Synechococcus sp. A15-62	162	T-GT	2	13	0	(T)7-(GT)3	noncoding
Synechococcus sp. A15-62	163	TC-TC	2	14	3	(TC)4-(TC)3	coding
Synechococcus sp. A15-62	164	AC-C	2	12	1	(AC)3-(C)6	coding
Synechococcus sp. A15-62	165	GGC-CG	2	15	7	(GGC)3-(CG)3	coding
Synechococcus sp. A15-62	166	TC-G	2	12	8	(TC)3-(G)6	coding
Synechococcus sp. A15-62	167	G-T-TC	3	18	4	(G)6-(T)6-(TC)3	noncoding
Synechococcus sp. A15-62	168	GGC-GC	2	15	8	(GGC)3-(GC)3	coding
Synechococcus sp. A15-62	169	GGC-GC	2	15	10	(GGC)3-(GC)3	coding
Synechococcus sp. A15-62	170	CAC-C	2	15	2	(CAC)3-(C)6	coding
Synechococcus sp. A15-62	171	C-GC	2	13	3	(C)7-(GC)3	coding
Synechococcus sp. A15-62	172	G-GT	2	14	6	(G)6-(GT)4	noncoding
Synechococcus sp. A15-62	173	CG-CAA	2	15	4	(CG)3-(CAA)3	coding
Synechococcus sp. A15-62	174	T-A	2	12	7	(T)6-(A)6	noncoding
Synechococcus sp. A15-62	175	CA-GGT	2	15	0	(CA)3-(GGT)3	coding
Synechococcus sp. A15-62	176	C-GCC	2	18	0	(C)6-(GCC)4	coding
Synechococcus sp. A15-62	177	GC-CAG	2	15	1	(GC)3-(CAG)3	coding
Synechococcus sp. A15-62	178	GGC-GC	2	15	9	(GGC)3-(GC)3	coding
Synechococcus sp. A15-62	179	GCCAAG-CTG	2	27	9	(GCCAAG)3-(CTG)3	coding
Synechococcus sp. A15-62	180	TCT-GC	2	15	5	(TCT)3-(GC)3	coding
Synechococcus sp. A15-62	181	GGA-CG	2	15	5	(GGA)3-(CG)3	coding
Synechococcus sp. A15-62	182	CAG-GC	2	21	10	(CAG)5-(GC)3	coding
Synechococcus sp. A15-62	183	GA-A	2	12	2	(GA)3-(A)6	coding
Synechococcus sp. A15-62	184	A-T	2	12	4	(A)6-(T)6	coding
Synechococcus sp. A15-62	185	A-AG	2	12	3	(A)6-(AG)3	noncoding
Synechococcus sp. A15-62	186	CG-GA	2	12	9	(CG)3-(GA)3	coding
Synechococcus sp. A15-62	187	GA-T	2	12	3	(GA)3-(T)6	coding
Synechococcus sp. A15-62	188	TGC-C	2	15	9	(TGC)3-(C)6	coding
Synechococcus sp. A15-62	189	GCA-AGA	2	18	1	(GCA)3-(AGA)3	coding
Synechococcus sp. A15-62	190	GTT-C	2	15	4	(GTT)3-(C)6	coding
Synechococcus sp. A15-62	191	GA-GGT	2	15	0	(GA)3-(GGT)3	coding
Synechococcus sp. A15-62	192	G-CG	2	12	4	(G)6-(CG)3	coding
Synechococcus sp. A15-62	193	A-A	2	14	8	(A)8-(A)6	coding
Synechococcus sp. A15-62	194	CT-A	2	14	7	(CT)3-(A)8	noncoding
Synechococcus sp. A15-62	195	T-CT	2	12	5	(T)6-(CT)3	coding
Synechococcus sp. A15-62	196	CAG-GCC	2	18	2	(CAG)3-(GCC)3	coding
Synechococcus sp. A15-62	197	A-A	2	14	1	(A)6-(A)8	coding
Synechococcus sp. A15-62	198	C-GCT	2	15	0	(C)6-(GCT)3	coding
Synechococcus sp. A15-62	199	T-A	2	12	6	(T)6-(A)6	coding
Parasynechococcus sp. WH 8109	1	CGA-AG	2	15	10	(CGA)3-(AG)3	coding
Parasynechococcus sp. WH 8109	2	C-GGC	2	15	8	(C)6-(GGC)3	coding
Parasynechococcus sp. WH 8109	3	GGT-GGC-GGC-GGCGGT	4	54	18	(GGT)3-(GGC)3-(GGC)6-(GGCGGT)3	coding
Parasynechococcus sp. WH 8109	4	G-T	2	15	1	(G)7-(T)8	noncoding
Parasynechococcus sp. WH 8109	5	TGC-GTT	2	21	7	(TGC)4-(GTT)3	coding
Parasynechococcus sp. WH 8109	6	GA-T	2	12	10	(GA)3-(T)6	coding
Parasynechococcus sp. WH 8109	7	G-CA	2	12	0	(G)6-(CA)3	noncoding
Parasynechococcus sp. WH 8109	8	T-AT	2	13	0	(T)7-(AT)3	noncoding
Parasynechococcus sp. WH 8109	9	CT-GA	2	14	3	(CT)4-(GA)3	coding
Parasynechococcus sp. WH 8109	10	T-T	2	13	5	(T)7-(T)6	coding
Parasynechococcus sp. WH 8109	11	TC-T	2	12	9	(TC)3-(T)6	coding
Parasynechococcus sp. WH 8109	12	CT-CA	2	12	8	(CT)3-(CA)3	coding
Parasynechococcus sp. WH 8109	13	GCT-TGG	2	21	4	(GCT)4-(TGG)3	coding
Parasynechococcus sp. WH 8109	14	T-TG	2	13	3	(T)7-(TG)3	noncoding
Parasynechococcus sp. WH 8109	15	GTG-TTG	2	18	3	(GTG)3-(TTG)3	coding
Parasynechococcus sp. WH 8109	16	T-T	2	12	10	(T)6-(T)6	coding
Parasynechococcus sp. WH 8109	17	CTG-GTG	2	18	3	(CTG)3-(GTG)3	noncoding
Parasynechococcus sp. WH 8109	18	TCG-GTC	2	18	5	(TCG)3-(GTC)3	coding
Parasynechococcus sp. WH 8109	19	GGC-GCG	2	27	10	(GGC)5-(GCG)4	coding
Parasynechococcus sp. WH 8109	20	AC-C	2	12	2	(AC)3-(C)6	coding
Parasynechococcus sp. WH 8109	21	CTG-G	2	15	4	(CTG)3-(G)6	coding
Parasynechococcus sp. WH 8109	22	GCT-CCA	2	18	1	(GCT)3-(CCA)3	coding
Parasynechococcus sp. WH 8109	23	GCG-CG	2	15	1	(GCG)3-(CG)3	coding
Parasynechococcus sp. WH 8109	24	TG-TC	2	12	9	(TG)3-(TC)3	coding
Parasynechococcus sp. WH 8109	25	GC-GGT	2	21	4	(GC)3-(GGT)5	coding
Parasynechococcus sp. WH 8109	26	GCC-CT	2	15	0	(GCC)3-(CT)3	coding
Parasynechococcus sp. WH 8109	27	CAC-GA	2	15	1	(CAC)3-(GA)3	coding
Parasynechococcus sp. WH 8109	28	G-AG	2	12	0	(G)6-(AG)3	coding
Parasynechococcus sp. WH 8109	29	CA-T	2	13	0	(CA)3-(T)7	coding
Parasynechococcus sp. WH 8109	30	ACC-T	2	15	1	(ACC)3-(T)6	coding
Parasynechococcus sp. WH 8109	31	CAG-TG	2	15	7	(CAG)3-(TG)3	coding
Parasynechococcus sp. WH 8109	32	GCT-G	2	16	0	(GCT)3-(G)7	coding
Parasynechococcus sp. WH 8109	33	CCGA-GA	2	18	5	(CCGA)3-(GA)3	coding
Parasynechococcus sp. WH 8109	34	AG-G	2	12	6	(AG)3-(G)6	coding
Parasynechococcus sp. WH 8109	35	C-AG	2	12	9	(C)6-(AG)3	coding
Parasynechococcus sp. WH 8109	36	G-G	2	12	2	(G)6-(G)6	coding
Parasynechococcus sp. WH 8109	37	C-T	2	12	1	(C)6-(T)6	coding
Parasynechococcus sp. WH 8109	38	A-C-G	3	19	3	(A)7-(C)6-(G)6	noncoding
Parasynechococcus sp. WH 8109	39	G-C-T	3	21	10	(G)6-(C)7-(T)8	noncoding
Parasynechococcus sp. WH 8109	40	AG-AT	2	12	8	(AG)3-(AT)3	noncoding
Parasynechococcus sp. WH 8109	41	GA-T	2	12	4	(GA)3-(T)6	noncoding
Parasynechococcus sp. WH 8109	42	GAAATG-GAC	2	33	0	(GAAATG)4-(GAC)3	coding
Parasynechococcus sp. WH 8109	43	CT-GGA	2	15	3	(CT)3-(GGA)3	coding
Parasynechococcus sp. WH 8109	44	G-C	2	13	7	(G)7-(C)6	noncoding
Parasynechococcus sp. WH 8109	45	G-C	2	12	9	(G)6-(C)6	noncoding
Parasynechococcus sp. WH 8109	46	GCA-C	2	15	3	(GCA)3-(C)6	coding
Parasynechococcus sp. WH 8109	47	CAA-GC	2	15	2	(CAA)3-(GC)3	coding
Parasynechococcus sp. WH 8109	48	AG-AG	2	16	9	(AG)3-(AG)5	coding
Parasynechococcus sp. WH 8109	49	A-TA-T	3	18	11	(A)6-(TA)3-(T)6	coding
Parasynechococcus sp. WH 8109	50	TC-G	2	12	2	(TC)3-(G)6	coding
Parasynechococcus sp. WH 8109	51	TGG-GT	2	15	4	(TGG)3-(GT)3	coding
Parasynechococcus sp. WH 8109	52	G-A	2	13	7	(G)6-(A)7	noncoding
Parasynechococcus sp. WH 8109	53	G-G	2	12	5	(G)6-(G)6	coding
Parasynechococcus sp. WH 8109	54	GCT-T	2	16	1	(GCT)3-(T)7	noncoding
Parasynechococcus sp. WH 8109	55	GC-GCA	2	15	5	(GC)3-(GCA)3	coding
Parasynechococcus sp. WH 8109	56	C-TC	2	12	1	(C)6-(TC)3	coding
Parasynechococcus sp. WH 8109	57	TGC-CG	2	18	7	(TGC)4-(CG)3	coding
Parasynechococcus sp. WH 8109	58	C-GCC	2	15	5	(C)6-(GCC)3	coding
Parasynechococcus sp. WH 8109	59	TGGC-GC	2	18	3	(TGGC)3-(GC)3	coding
Parasynechococcus sp. WH 8109	60	CTG-CGC	2	18	6	(CTG)3-(CGC)3	coding
Parasynechococcus sp. WH 8109	61	GC-GT	2	12	10	(GC)3-(GT)3	coding
Parasynechococcus sp. WH 8109	62	G-ACC	2	15	2	(G)6-(ACC)3	coding
Parasynechococcus sp. WH 8109	63	CAG-GCA	2	18	2	(CAG)3-(GCA)3	coding
Parasynechococcus sp. WH 8109	64	TC-GA	2	12	6	(TC)3-(GA)3	noncoding
Parasynechococcus sp. WH 8109	65	GC-CA	2	12	7	(GC)3-(CA)3	noncoding
Parasynechococcus sp. WH 8109	66	AG-TA	2	12	1	(AG)3-(TA)3	noncoding
Parasynechococcus sp. WH 8109	67	C-G	2	14	1	(C)6-(G)8	coding
Parasynechococcus sp. WH 8109	68	CAG-GCT	2	21	0	(CAG)4-(GCT)3	coding
Parasynechococcus sp. WH 8109	69	CGG-CAG	2	18	10	(CGG)3-(CAG)3	coding
Parasynechococcus sp. WH 8109	70	CCA-TGC	2	18	1	(CCA)3-(TGC)3	coding
Parasynechococcus sp. WH 8109	71	CCA-CT	2	18	2	(CCA)4-(CT)3	coding
Parasynechococcus sp. WH 8109	72	CT-A	2	12	9	(CT)3-(A)6	noncoding
Parasynechococcus sp. WH 8109	73	TG-GT	2	14	6	(TG)4-(GT)3	noncoding
Parasynechococcus sp. WH 8109	74	A-T	2	12	7	(A)6-(T)6	noncoding
Parasynechococcus sp. WH 8109	75	TC-A	2	13	3	(TC)3-(A)7	noncoding
Parasynechococcus sp. WH 8109	76	G-ACA	2	15	8	(G)6-(ACA)3	coding
Parasynechococcus sp. WH 8109	77	GGTGCT-GCT	2	27	0	(GGTGCT)3-(GCT)3	coding
Parasynechococcus sp. WH 8109	78	T-GTG	2	16	6	(T)7-(GTG)3	noncoding
Parasynechococcus sp. WH 8109	79	AG-C	2	12	9	(AG)3-(C)6	coding
Parasynechococcus sp. WH 8109	80	CA-T	2	12	8	(CA)3-(T)6	noncoding
Parasynechococcus sp. WH 8109	81	CG-CAG	2	15	10	(CG)3-(CAG)3	coding
Parasynechococcus sp. WH 8109	82	TTG-GA	2	15	0	(TTG)3-(GA)3	coding
Parasynechococcus sp. WH 8109	83	C-GC	2	12	9	(C)6-(GC)3	coding
Parasynechococcus sp. WH 8109	84	GA-CTG	2	15	3	(GA)3-(CTG)3	coding
Parasynechococcus sp. WH 8109	85	GAC-C	2	15	9	(GAC)3-(C)6	coding
Parasynechococcus sp. WH 8109	86	GCA-G	2	16	0	(GCA)3-(G)7	coding
Parasynechococcus sp. WH 8109	87	AG-TGC	2	15	5	(AG)3-(TGC)3	coding
Parasynechococcus sp. WH 8109	88	AC-T	2	13	0	(AC)3-(T)7	coding
Parasynechococcus sp. WH 8109	89	G-TGA	2	15	4	(G)6-(TGA)3	noncoding
Parasynechococcus sp. WH 8109	90	T-TA	2	12	1	(T)6-(TA)3	coding
Parasynechococcus sp. WH 8109	91	GC-AG	2	12	6	(GC)3-(AG)3	noncoding
Parasynechococcus sp. WH 8109	92	AT-GC	2	14	4	(AT)3-(GC)4	coding
Parasynechococcus sp. WH 8109	93	CGG-T	2	17	10	(CGG)3-(T)8	coding
Parasynechococcus sp. WH 8109	94	C-T	2	12	0	(C)6-(T)6	noncoding
Parasynechococcus sp. WH 8109	95	GA-ACA	2	15	6	(GA)3-(ACA)3	coding
Parasynechococcus sp. WH 8109	96	C-AG	2	12	0	(C)6-(AG)3	coding
Parasynechococcus sp. WH 8109	97	CT-A-T	3	18	11	(CT)3-(A)6-(T)6	noncoding
Parasynechococcus sp. WH 8109	98	C-GC	2	12	9	(C)6-(GC)3	coding
Parasynechococcus sp. WH 8109	99	GA-CTG	2	15	10	(GA)3-(CTG)3	coding
Parasynechococcus sp. WH 8109	100	GCT-TGG	2	18	8	(GCT)3-(TGG)3	coding
Parasynechococcus sp. WH 8109	101	T-G	2	16	0	(T)9-(G)7	coding
Parasynechococcus sp. WH 8109	102	CT-C	2	12	9	(CT)3-(C)6	coding
Parasynechococcus sp. WH 8109	103	ATCC-AG	2	18	0	(ATCC)3-(AG)3	coding
Parasynechococcus sp. WH 8109	104	TGG-TGG	2	18	6	(TGG)3-(TGG)3	coding
Parasynechococcus sp. WH 8109	105	CT-G	2	12	3	(CT)3-(G)6	coding
Parasynechococcus sp. WH 8109	106	AC-AGT	2	15	4	(AC)3-(AGT)3	coding
Parasynechococcus sp. WH 8109	107	AG-AG	2	12	9	(AG)3-(AG)3	coding
Parasynechococcus sp. WH 8109	108	T-GT	2	12	3	(T)6-(GT)3	noncoding
Parasynechococcus sp. WH 8109	109	AT-A	2	12	9	(AT)3-(A)6	coding
Parasynechococcus sp. WH 8109	110	A-CA	2	12	3	(A)6-(CA)3	noncoding
Parasynechococcus sp. WH 8109	111	AGC-CG	2	15	6	(AGC)3-(CG)3	coding
Parasynechococcus sp. WH 8109	112	G-GCG	2	17	5	(G)8-(GCG)3	coding
Parasynechococcus sp. WH 8109	113	GC-AGC	2	15	8	(GC)3-(AGC)3	coding
Parasynechococcus sp. WH 8109	114	C-GC	2	12	9	(C)6-(GC)3	coding
Parasynechococcus sp. WH 8109	115	CA-CA	2	12	9	(CA)3-(CA)3	coding
Parasynechococcus sp. WH 8109	116	A-A	2	12	3	(A)6-(A)6	coding
Parasynechococcus sp. WH 8109	117	A-A	2	14	5	(A)7-(A)7	coding
Parasynechococcus sp. WH 8109	118	CA-C	2	12	9	(CA)3-(C)6	noncoding
Parasynechococcus sp. WH 8109	119	GC-TG	2	12	0	(GC)3-(TG)3	coding
Parasynechococcus sp. WH 8109	120	CA-GCT	2	15	0	(CA)3-(GCT)3	coding
Parasynechococcus sp. WH 8109	121	C-C	2	13	9	(C)6-(C)7	coding
Parasynechococcus sp. WH 8109	122	C-CAG	2	15	5	(C)6-(CAG)3	coding
Parasynechococcus sp. WH 8109	123	AC-GGT	2	15	6	(AC)3-(GGT)3	coding
Parasynechococcus sp. WH 8109	124	CGA-A	2	15	6	(CGA)3-(A)6	noncoding
Parasynechococcus sp. WH 8109	125	AG-C	2	12	6	(AG)3-(C)6	noncoding
Parasynechococcus sp. WH 8109	126	GCC-GCA	2	18	2	(GCC)3-(GCA)3	coding
Parasynechococcus sp. WH 8109	127	C-AGC	2	16	6	(C)7-(AGC)3	noncoding
Parasynechococcus sp. WH 8109	128	AG-G	2	12	2	(AG)3-(G)6	noncoding
Parasynechococcus sp. WH 8109	129	CCA-CTG	2	18	7	(CCA)3-(CTG)3	coding
Parasynechococcus sp. WH 8109	130	C-T	2	12	0	(C)6-(T)6	noncoding
Parasynechococcus sp. WH 8109	131	TCG-GGC	2	18	2	(TCG)3-(GGC)3	coding
Parasynechococcus sp. WH 8109	132	CGC-GCC	2	18	4	(CGC)3-(GCC)3	coding
Parasynechococcus sp. WH 8109	133	CTG-GCG	2	21	10	(CTG)4-(GCG)3	coding
Parasynechococcus sp. WH 8109	134	GA-G	2	13	6	(GA)3-(G)7	coding
Parasynechococcus sp. WH 8109	135	AG-CCTGCA	2	24	7	(AG)3-(CCTGCA)3	coding
Parasynechococcus sp. WH 8109	136	A-GC	2	12	2	(A)6-(GC)3	coding
Parasynechococcus sp. WH 8109	137	G-G	2	21	2	(G)7-(G)14	noncoding
Parasynechococcus sp. WH 8109	138	C-G	2	12	0	(C)6-(G)6	coding
Parasynechococcus sp. WH 8109	139	C-GC	2	12	4	(C)6-(GC)3	coding
Parasynechococcus sp. WH 8109	140	GGC-CG	2	15	7	(GGC)3-(CG)3	coding
Parasynechococcus sp. WH 8109	141	TC-G	2	12	8	(TC)3-(G)6	coding
Parasynechococcus sp. WH 8109	142	C-C	2	13	5	(C)7-(C)6	coding
Parasynechococcus sp. WH 8109	143	C-G-T-TC	4	25	12	(C)7-(G)6-(T)6-(TC)3	noncoding
Parasynechococcus sp. WH 8109	144	GA-T	2	12	1	(GA)3-(T)6	noncoding
Parasynechococcus sp. WH 8109	145	A-C	2	14	1	(A)8-(C)6	noncoding
Parasynechococcus sp. WH 8109	146	A-TA	2	13	9	(A)7-(TA)3	coding
Parasynechococcus sp. WH 8109	147	CA-GC	2	12	5	(CA)3-(GC)3	coding
Parasynechococcus sp. WH 8109	148	GGC-GC	2	15	9	(GGC)3-(GC)3	coding
Parasynechococcus sp. WH 8109	149	AC-AC	2	12	7	(AC)3-(AC)3	coding
Parasynechococcus sp. WH 8109	150	CT-A	2	12	0	(CT)3-(A)6	noncoding
Parasynechococcus sp. WH 8109	151	TCT-GC	2	15	5	(TCT)3-(GC)3	coding
Parasynechococcus sp. WH 8109	152	GGA-CG	2	15	5	(GGA)3-(CG)3	coding
Parasynechococcus sp. WH 8109	153	GCA-GC	2	15	0	(GCA)3-(GC)3	coding
Parasynechococcus sp. WH 8109	154	AGC-GC	2	21	9	(AGC)5-(GC)3	coding
Parasynechococcus sp. WH 8109	155	TGC-C	2	15	9	(TGC)3-(C)6	coding
Parasynechococcus sp. WH 8109	156	GCA-GAA	2	18	2	(GCA)3-(GAA)3	coding
Parasynechococcus sp. WH 8109	157	CG-AG	2	12	8	(CG)3-(AG)3	coding
Parasynechococcus sp. WH 8109	158	G-CG	2	12	4	(G)6-(CG)3	coding
Parasynechococcus sp. WH 8109	159	A-A	2	13	2	(A)6-(A)7	coding
Synechococcus sp. UW86	1	T-C	2	13	7	(T)7-(C)6	noncoding
Synechococcus sp. UW86	2	GCC-GCA	2	18	2	(GCC)3-(GCA)3	coding
Synechococcus sp. UW86	3	C-CCG	2	15	3	(C)6-(CCG)3	coding
Synechococcus sp. UW86	4	GC-GC	2	12	3	(GC)3-(GC)3	coding
Synechococcus sp. UW86	5	AG-G	2	14	2	(AG)4-(G)6	noncoding
Synechococcus sp. UW86	6	CCA-CTG	2	18	7	(CCA)3-(CTG)3	coding
Synechococcus sp. UW86	7	GC-GCA	2	15	1	(GC)3-(GCA)3	coding
Synechococcus sp. UW86	8	CG-AC	2	12	3	(CG)3-(AC)3	noncoding
Synechococcus sp. UW86	9	GCA-CAA	2	18	8	(GCA)3-(CAA)3	coding
Synechococcus sp. UW86	10	TCG-GGC	2	18	2	(TCG)3-(GGC)3	coding
Synechococcus sp. UW86	11	GA-CAG	2	15	0	(GA)3-(CAG)3	coding
Synechococcus sp. UW86	12	CTG-GCG	2	21	10	(CTG)4-(GCG)3	coding
Synechococcus sp. UW86	13	AGC-GA	2	15	7	(AGC)3-(GA)3	coding
Synechococcus sp. UW86	14	GA-G	2	13	6	(GA)3-(G)7	coding
Synechococcus sp. UW86	15	GC-GCA	2	15	5	(GC)3-(GCA)3	coding
Synechococcus sp. UW86	16	C-TC	2	12	1	(C)6-(TC)3	coding
Synechococcus sp. UW86	17	TGC-CG	2	15	7	(TGC)3-(CG)3	coding
Synechococcus sp. UW86	18	GC-TG	2	12	5	(GC)3-(TG)3	coding
Synechococcus sp. UW86	19	C-GCC	2	15	5	(C)6-(GCC)3	coding
Synechococcus sp. UW86	20	TGGC-GC	2	18	3	(TGGC)3-(GC)3	coding
Synechococcus sp. UW86	21	CTG-CGC	2	18	6	(CTG)3-(CGC)3	coding
Synechococcus sp. UW86	22	GC-GT	2	12	10	(GC)3-(GT)3	coding
Synechococcus sp. UW86	23	CAG-GCA	2	18	2	(CAG)3-(GCA)3	coding
Synechococcus sp. UW86	24	GC-CA	2	12	7	(GC)3-(CA)3	noncoding
Synechococcus sp. UW86	25	GTG-GT	2	15	10	(GTG)3-(GT)3	coding
Synechococcus sp. UW86	26	A-G-C-T	4	27	8	(A)6-(G)6-(C)8-(T)7	noncoding
Synechococcus sp. UW86	27	CCA-AG	2	18	0	(CCA)4-(AG)3	coding
Synechococcus sp. UW86	28	GT-GCT	2	18	1	(GT)3-(GCT)4	coding
Synechococcus sp. UW86	29	AGC-C	2	15	3	(AGC)3-(C)6	coding
Synechococcus sp. UW86	30	CCG-CGC	2	18	1	(CCG)3-(CGC)3	coding
Synechococcus sp. UW86	31	GGT-CTG	2	18	9	(GGT)3-(CTG)3	coding
Synechococcus sp. UW86	32	AG-G	2	13	2	(AG)3-(G)7	coding
Synechococcus sp. UW86	33	TGG-TC	2	18	4	(TGG)4-(TC)3	coding
Synechococcus sp. UW86	34	CCA-TGC	2	18	1	(CCA)3-(TGC)3	coding
Synechococcus sp. UW86	35	GT-TAG	2	15	4	(GT)3-(TAG)3	coding
Synechococcus sp. UW86	36	T-T	2	13	9	(T)7-(T)6	noncoding
Synechococcus sp. UW86	37	TG-GT	2	14	6	(TG)4-(GT)3	noncoding
Synechococcus sp. UW86	38	C-A	2	24	0	(C)16-(A)8	noncoding
Synechococcus sp. UW86	39	G-ACA	2	15	8	(G)6-(ACA)3	coding
Synechococcus sp. UW86	40	T-T	2	12	5	(T)6-(T)6	coding
Synechococcus sp. UW86	41	A-G	2	13	2	(A)6-(G)7	noncoding
Synechococcus sp. UW86	42	GC-TGC	2	15	5	(GC)3-(TGC)3	coding
Synechococcus sp. UW86	43	GA-C	2	12	8	(GA)3-(C)6	coding
Synechococcus sp. UW86	44	GCA-CCT	2	18	0	(GCA)3-(CCT)3	coding
Synechococcus sp. UW86	45	T-CTG	2	17	7	(T)8-(CTG)3	noncoding
Synechococcus sp. UW86	46	TTG-GA	2	15	0	(TTG)3-(GA)3	coding
Synechococcus sp. UW86	47	GAC-C	2	15	9	(GAC)3-(C)6	coding
Synechococcus sp. UW86	48	CA-GC	2	12	0	(CA)3-(GC)3	coding
Synechococcus sp. UW86	49	GCA-CGC	2	18	1	(GCA)3-(CGC)3	coding
Synechococcus sp. UW86	50	C-CCA	2	15	4	(C)6-(CCA)3	coding
Synechococcus sp. UW86	51	G-TGA	2	15	4	(G)6-(TGA)3	noncoding
Synechococcus sp. UW86	52	C-AG	2	12	0	(C)6-(AG)3	coding
Synechococcus sp. UW86	53	AG-TCG	2	15	8	(AG)3-(TCG)3	coding
Synechococcus sp. UW86	54	TGT-C	2	15	0	(TGT)3-(C)6	coding
Synechococcus sp. UW86	55	CCA-GCT	2	18	3	(CCA)3-(GCT)3	coding
Synechococcus sp. UW86	56	GA-GA	2	12	5	(GA)3-(GA)3	noncoding
Synechococcus sp. UW86	57	GCA-CAG	2	18	10	(GCA)3-(CAG)3	coding
Synechococcus sp. UW86	58	GCT-TGG	2	18	8	(GCT)3-(TGG)3	coding
Synechococcus sp. UW86	59	AC-CCA	2	15	4	(AC)3-(CCA)3	coding
Synechococcus sp. UW86	60	AGC-AG	2	15	2	(AGC)3-(AG)3	coding
Synechococcus sp. UW86	61	TGG-G	2	15	1	(TGG)3-(G)6	coding
Synechococcus sp. UW86	62	T-T	2	13	9	(T)7-(T)6	coding
Synechococcus sp. UW86	63	GGA-T	2	15	10	(GGA)3-(T)6	coding
Synechococcus sp. UW86	64	C-C	2	12	6	(C)6-(C)6	noncoding
Synechococcus sp. UW86	65	G-AG	2	12	0	(G)6-(AG)3	coding
Synechococcus sp. UW86	66	CA-T	2	13	0	(CA)3-(T)7	coding
Synechococcus sp. UW86	67	ACC-T	2	15	1	(ACC)3-(T)6	coding
Synechococcus sp. UW86	68	CAG-TG	2	15	7	(CAG)3-(TG)3	coding
Synechococcus sp. UW86	69	GCT-G	2	16	0	(GCT)3-(G)7	coding
Synechococcus sp. UW86	70	AG-G	2	12	6	(AG)3-(G)6	coding
Synechococcus sp. UW86	71	C-AG	2	12	9	(C)6-(AG)3	coding
Synechococcus sp. UW86	72	G-G	2	12	2	(G)6-(G)6	coding
Synechococcus sp. UW86	73	A-C-G	3	19	3	(A)7-(C)6-(G)6	noncoding
Synechococcus sp. UW86	74	G-C-GC	3	18	15	(G)6-(C)6-(GC)3	noncoding
Synechococcus sp. UW86	75	GTT-CT	2	15	5	(GTT)3-(CT)3	noncoding
Synechococcus sp. UW86	76	CT-C	2	12	9	(CT)3-(C)6	coding
Synechococcus sp. UW86	77	TGG-TGG	2	18	6	(TGG)3-(TGG)3	coding
Synechococcus sp. UW86	78	CTC-GT	2	15	5	(CTC)3-(GT)3	coding
Synechococcus sp. UW86	79	AC-GTG	2	15	5	(AC)3-(GTG)3	coding
Synechococcus sp. UW86	80	CGG-CTG	2	18	5	(CGG)3-(CTG)3	coding
Synechococcus sp. UW86	81	GCA-C	2	15	3	(GCA)3-(C)6	coding
Synechococcus sp. UW86	82	A-C	2	12	0	(A)6-(C)6	noncoding
Synechococcus sp. UW86	83	CAG-G-G	3	22	9	(CAG)3-(G)6-(G)7	coding
Synechococcus sp. UW86	84	CG-GCC	2	15	7	(CG)3-(GCC)3	coding
Synechococcus sp. UW86	85	GCC-GCT	2	24	10	(GCC)4-(GCT)4	coding
Synechococcus sp. UW86	86	TCC-CAG	2	18	8	(TCC)3-(CAG)3	coding
Synechococcus sp. UW86	87	GTC-ACC	2	18	1	(GTC)3-(ACC)3	coding
Synechococcus sp. UW86	88	T-GCT	2	15	1	(T)6-(GCT)3	coding
Synechococcus sp. UW86	89	T-A	2	13	1	(T)6-(A)7	coding
Synechococcus sp. UW86	90	C-T	2	12	2	(C)6-(T)6	coding
Synechococcus sp. UW86	91	TC-GGT	2	15	0	(TC)3-(GGT)3	coding
Synechococcus sp. UW86	92	GA-GCG	2	15	0	(GA)3-(GCG)3	coding
Synechococcus sp. UW86	93	C-GC	2	12	10	(C)6-(GC)3	coding
Synechococcus sp. UW86	94	AT-T	2	13	10	(AT)3-(T)7	coding
Synechococcus sp. UW86	95	TC-CT	2	12	3	(TC)3-(CT)3	coding
Synechococcus sp. UW86	96	A-A-A	3	19	2	(A)6-(A)6-(A)7	noncoding
Synechococcus sp. UW86	97	CA-GGT	2	15	0	(CA)3-(GGT)3	coding
Synechococcus sp. UW86	98	GC-CAG	2	15	1	(GC)3-(CAG)3	coding
Synechococcus sp. UW86	99	GGC-GC	2	15	9	(GGC)3-(GC)3	coding
Synechococcus sp. UW86	100	CA-CA	2	12	9	(CA)3-(CA)3	coding
Synechococcus sp. UW86	101	TCT-GC	2	15	5	(TCT)3-(GC)3	coding
Synechococcus sp. UW86	102	GGA-CG	2	15	5	(GGA)3-(CG)3	coding
Synechococcus sp. UW86	103	AGC-GC	2	21	9	(AGC)5-(GC)3	coding
Synechococcus sp. UW86	104	TGC-C	2	15	9	(TGC)3-(C)6	coding
Synechococcus sp. UW86	105	GCA-GAA	2	18	2	(GCA)3-(GAA)3	coding
Synechococcus sp. UW86	106	GCT-GCG	2	18	2	(GCT)3-(GCG)3	coding
Synechococcus sp. UW86	107	G-CG	2	12	4	(G)6-(CG)3	coding
Synechococcus sp. UW86	108	C-GC	2	12	3	(C)6-(GC)3	coding
Synechococcus sp. UW86	109	A-A	2	13	2	(A)6-(A)7	noncoding
Synechococcus sp. UW86	110	C-GCT	2	15	0	(C)6-(GCT)3	coding
Synechococcus sp. UW86	111	T-T	2	12	1	(T)6-(T)6	noncoding
Synechococcus sp. UW86	112	C-CGC	2	18	3	(C)6-(CGC)4	coding
Synechococcus sp. UW86	113	TC-G	2	12	4	(TC)3-(G)6	coding
Synechococcus sp. UW86	114	C-GGC	2	15	5	(C)6-(GGC)3	coding
Synechococcus sp. UW86	115	CGG-TGG-CGG-GGTGGC-GGT	5	54	13	(CGG)3-(TGG)3-(CGG)3-(GGTGGC)3-(GGT)3	coding
Synechococcus sp. UW86	116	G-T	2	15	1	(G)7-(T)8	noncoding
Synechococcus sp. UW86	117	TGG-TGG	2	18	6	(TGG)3-(TGG)3	coding
Synechococcus sp. UW86	118	CG-CGT	2	15	3	(CG)3-(CGT)3	coding
Synechococcus sp. UW86	119	GA-G-CAG	3	21	10	(GA)3-(G)6-(CAG)3	coding
Synechococcus sp. UW86	120	TGC-TGG	2	21	5	(TGC)4-(TGG)3	coding
Synechococcus sp. UW86	121	TC-GC	2	14	10	(TC)4-(GC)3	coding
Synechococcus sp. UW86	122	T-T	2	13	9	(T)7-(T)6	coding
Synechococcus sp. UW86	123	A-A	2	15	2	(A)9-(A)6	coding
Synechococcus sp. UW86	124	TAT-A	2	17	3	(TAT)3-(A)8	coding
Synechococcus sp. UW86	125	GA-A	2	13	3	(GA)3-(A)7	coding
Synechococcus sp. UW86	126	A-T	2	12	5	(A)6-(T)6	coding
Synechococcus sp. UW86	127	C-TC	2	12	1	(C)6-(TC)3	noncoding
Synechococcus sp. UW86	128	TC-CT	2	16	8	(TC)4-(CT)4	noncoding
Synechococcus sp. UW86	129	CA-GT	2	12	0	(CA)3-(GT)3	coding
Synechococcus sp. UW86	130	C-TGG	2	15	0	(C)6-(TGG)3	coding
Synechococcus sp. UW86	131	T-CT	2	12	10	(T)6-(CT)3	coding
Synechococcus sp. UW86	132	T-AT	2	13	7	(T)7-(AT)3	coding
Synechococcus sp. UW86	133	GTT-AGC	2	18	9	(GTT)3-(AGC)3	coding
Synechococcus sp. UW86	134	AC-C	2	12	2	(AC)3-(C)6	coding
Synechococcus sp. UW86	135	CTG-G	2	16	3	(CTG)3-(G)7	coding
Synechococcus sp. UW86	136	CA-TC	2	12	2	(CA)3-(TC)3	coding
Synechococcus sp. UW86	137	GCT-CCA	2	18	1	(GCT)3-(CCA)3	coding
Synechococcus sp. UW86	138	GCG-CG	2	15	1	(GCG)3-(CG)3	coding
Synechococcus sp. UW86	139	TG-TC	2	14	7	(TG)4-(TC)3	coding
Synechococcus sp. UW86	140	GTG-GCT	2	18	8	(GTG)3-(GCT)3	coding
Synechococcus sp. UW86	141	T-TCG	2	15	6	(T)6-(TCG)3	noncoding
Synechococcus sp. UW86	142	ACC-GT	2	15	6	(ACC)3-(GT)3	coding
Synechococcus sp. UW86	143	CTG-G	2	15	5	(CTG)3-(G)6	coding
Synechococcus sp. UW86	144	G-G	2	14	8	(G)7-(G)7	coding
Synechococcus sp. UW86	145	CA-GC	2	12	0	(CA)3-(GC)3	coding
Synechococcus sp. UW86	146	G-GT	2	12	8	(G)6-(GT)3	noncoding
Synechococcus sp. UW86	147	GTG-GCG	2	18	0	(GTG)3-(GCG)3	coding
Synechococcus sp. UW86	148	CCA-C	2	15	3	(CCA)3-(C)6	coding
Synechococcus sp. UW86	149	TG-AC	2	12	4	(TG)3-(AC)3	coding
Synechococcus sp. UW86	150	C-G	2	14	4	(C)6-(G)8	coding
Synechococcus sp. UW86	151	GCG-GC	2	15	2	(GCG)3-(GC)3	coding
Synechococcus sp. UW86	152	GCC-TG	2	18	3	(GCC)4-(TG)3	coding
Synechococcus sp. UW86	153	GC-CGCCAG	2	24	1	(GC)3-(CGCCAG)3	coding
Synechococcus sp. UW86	154	G-GCCGA	2	21	7	(G)6-(GCCGA)3	coding
Synechococcus sp. UW86	155	CG-GCT	2	15	6	(CG)3-(GCT)3	coding
Synechococcus sp. UW86	156	GT-GT	2	12	7	(GT)3-(GT)3	noncoding
Synechococcus sp. MU1617	1	TGT-CG	2	15	6	(TGT)3-(CG)3	coding
Synechococcus sp. MU1617	2	TGG-GCT	2	18	10	(TGG)3-(GCT)3	coding
Synechococcus sp. MU1617	3	CCG-CCA	2	18	4	(CCG)3-(CCA)3	coding
Synechococcus sp. MU1617	4	TC-T	2	12	1	(TC)3-(T)6	noncoding
Synechococcus sp. MU1617	5	C-A	2	20	0	(C)10-(A)10	noncoding
Synechococcus sp. MU1617	6	A-CAC	2	16	5	(A)7-(CAC)3	coding
Synechococcus sp. MU1617	7	AG-AGA	2	15	8	(AG)3-(AGA)3	noncoding
Synechococcus sp. MU1617	8	A-A	2	14	9	(A)8-(A)6	noncoding
Synechococcus sp. MU1617	9	CA-GC	2	12	0	(CA)3-(GC)3	coding
Synechococcus sp. MU1617	10	TC-TGG	2	15	10	(TC)3-(TGG)3	coding
Synechococcus sp. MU1617	11	AT-TTC-A	3	21	15	(AT)3-(TTC)3-(A)6	noncoding
Synechococcus sp. MU1617	12	G-TGA	2	16	3	(G)7-(TGA)3	noncoding
Synechococcus sp. MU1617	13	GC-T	2	12	0	(GC)3-(T)6	noncoding
Synechococcus sp. MU1617	14	GAC-GGT	2	21	6	(GAC)4-(GGT)3	noncoding
Synechococcus sp. MU1617	15	AG-GTG	2	18	7	(AG)3-(GTG)4	coding
Synechococcus sp. MU1617	16	CGG-C	2	19	8	(CGG)4-(C)7	coding
Synechococcus sp. MU1617	17	G-CT	2	12	10	(G)6-(CT)3	coding
Synechococcus sp. MU1617	18	CAA-C	2	15	6	(CAA)3-(C)6	coding
Synechococcus sp. MU1617	19	CA-TC	2	12	10	(CA)3-(TC)3	coding
Synechococcus sp. MU1617	20	CCA-GCT	2	18	3	(CCA)3-(GCT)3	coding
Synechococcus sp. MU1617	21	C-GC	2	13	9	(C)7-(GC)3	coding
Synechococcus sp. MU1617	22	TGC-TGG	2	24	7	(TGC)3-(TGG)5	coding
Synechococcus sp. MU1617	23	AG-AG	2	12	1	(AG)3-(AG)3	coding
Synechococcus sp. MU1617	24	GC-AG	2	14	0	(GC)4-(AG)3	coding
Synechococcus sp. MU1617	25	T-GA	2	12	0	(T)6-(GA)3	noncoding
Synechococcus sp. MU1617	26	GCG-G	2	15	4	(GCG)3-(G)6	coding
Synechococcus sp. MU1617	27	GC-GC	2	14	10	(GC)4-(GC)3	coding
Synechococcus sp. MU1617	28	TGT-CGC	2	18	0	(TGT)3-(CGC)3	coding
Synechococcus sp. MU1617	29	A-GA	2	12	1	(A)6-(GA)3	coding
Synechococcus sp. MU1617	30	AC-CA	2	12	6	(AC)3-(CA)3	noncoding
Synechococcus sp. MU1617	31	T-A-G-C	4	32	9	(T)8-(A)6-(G)12-(C)6	noncoding
Synechococcus sp. MU1617	32	CTG-G	2	15	1	(CTG)3-(G)6	coding
Synechococcus sp. MU1617	33	CT-CCA	2	15	8	(CT)3-(CCA)3	coding
Synechococcus sp. MU1617	34	CA-TGC	2	15	7	(CA)3-(TGC)3	coding
Synechococcus sp. MU1617	35	CGA-GCA	2	18	0	(CGA)3-(GCA)3	coding
Synechococcus sp. MU1617	36	C-G	2	12	1	(C)6-(G)6	coding
Synechococcus sp. MU1617	37	C-GC	2	12	3	(C)6-(GC)3	coding
Synechococcus sp. MU1617	38	CAG-CAC	2	18	8	(CAG)3-(CAC)3	coding
Synechococcus sp. MU1617	39	GT-AG	2	12	2	(GT)3-(AG)3	noncoding
Synechococcus sp. MU1617	40	TC-C	2	12	0	(TC)3-(C)6	noncoding
Synechococcus sp. MU1617	41	CAG-AGC	2	21	7	(CAG)3-(AGC)4	coding
Synechococcus sp. MU1617	42	CCA-AG	2	15	4	(CCA)3-(AG)3	coding
Synechococcus sp. MU1617	43	A-G-C-T	4	26	7	(A)7-(G)6-(C)6-(T)7	noncoding
Synechococcus sp. MU1617	44	AC-CAC	2	15	10	(AC)3-(CAC)3	coding
Synechococcus sp. MU1617	45	TG-GC	2	12	7	(TG)3-(GC)3	noncoding
Synechococcus sp. MU1617	46	CCA-CGT	2	18	0	(CCA)3-(CGT)3	coding
Synechococcus sp. MU1617	47	CGG-G	2	15	6	(CGG)3-(G)6	coding
Synechococcus sp. MU1617	48	CA-CA	2	12	9	(CA)3-(CA)3	coding
Synechococcus sp. MU1617	49	GC-CTG	2	15	4	(GC)3-(CTG)3	coding
Synechococcus sp. MU1617	50	GC-GA	2	12	5	(GC)3-(GA)3	noncoding
Synechococcus sp. MU1617	51	A-A	2	12	3	(A)6-(A)6	coding
Synechococcus sp. MU1617	52	CA-C	2	12	9	(CA)3-(C)6	noncoding
Synechococcus sp. MU1617	53	TGC-C	2	15	4	(TGC)3-(C)6	coding
Synechococcus sp. MU1617	54	CA-CTG	2	15	1	(CA)3-(CTG)3	coding
Synechococcus sp. MU1617	55	GC-GTG	2	15	3	(GC)3-(GTG)3	coding
Synechococcus sp. MU1617	56	TC-AG	2	12	1	(TC)3-(AG)3	coding
Synechococcus sp. MU1617	57	C-C	2	14	8	(C)7-(C)7	coding
Synechococcus sp. MU1617	58	AC-GGT	2	15	6	(AC)3-(GGT)3	coding
Synechococcus sp. MU1617	59	A-GA	2	12	3	(A)6-(GA)3	coding
Synechococcus sp. MU1617	60	GC-A	2	12	7	(GC)3-(A)6	coding
Synechococcus sp. MU1617	61	GTG-CTG	2	21	5	(GTG)3-(CTG)4	coding
Synechococcus sp. MU1617	62	TCC-GA	2	15	3	(TCC)3-(GA)3	coding
Synechococcus sp. MU1617	63	GCA-C	2	15	3	(GCA)3-(C)6	coding
Synechococcus sp. MU1617	64	T-A	2	12	7	(T)6-(A)6	noncoding
Synechococcus sp. MU1617	65	GC-CAG	2	15	1	(GC)3-(CAG)3	coding
Synechococcus sp. MU1617	66	GGC-GC	2	15	9	(GGC)3-(GC)3	coding
Synechococcus sp. MU1617	67	GCCAAG-GCT	2	27	8	(GCCAAG)3-(GCT)3	coding
Synechococcus sp. MU1617	68	TCT-GC	2	15	5	(TCT)3-(GC)3	coding
Synechococcus sp. MU1617	69	TC-C	2	12	0	(TC)3-(C)6	coding
Synechococcus sp. MU1617	70	TGC-C	2	15	9	(TGC)3-(C)6	coding
Synechococcus sp. MU1617	71	CT-GA	2	12	4	(CT)3-(GA)3	coding
Synechococcus sp. MU1617	72	CT-A	2	12	1	(CT)3-(A)6	noncoding
Synechococcus sp. MU1617	73	GA-AGC	2	15	7	(GA)3-(AGC)3	coding
Synechococcus sp. MU1617	74	CAA-CAG	2	24	9	(CAA)3-(CAG)5	coding
Synechococcus sp. MU1617	75	TGC-GGC	2	18	7	(TGC)3-(GGC)3	coding
Synechococcus sp. MU1617	76	CT-A	2	13	7	(CT)3-(A)7	noncoding
Synechococcus sp. MU1617	77	A-A	2	13	2	(A)6-(A)7	noncoding
Synechococcus sp. MU1617	78	C-GCT	2	15	0	(C)6-(GCT)3	coding
Synechococcus sp. MU1617	79	CT-GCG	2	15	7	(CT)3-(GCG)3	coding
Synechococcus sp. MU1617	80	T-T	2	13	1	(T)6-(T)7	noncoding
Synechococcus sp. MU1617	81	C-GGT-CGG	3	27	16	(C)6-(GGT)3-(CGG)4	coding
Synechococcus sp. MU1617	82	G-T	2	14	1	(G)7-(T)7	noncoding
Synechococcus sp. MU1617	83	A-ACC	2	15	10	(A)6-(ACC)3	coding
Synechococcus sp. MU1617	84	GCA-C	2	16	6	(GCA)3-(C)7	coding
Synechococcus sp. MU1617	85	T-T	2	14	7	(T)6-(T)8	noncoding
Synechococcus sp. MU1617	86	TTC-TC	2	15	3	(TTC)3-(TC)3	coding
Synechococcus sp. MU1617	87	GA-T	2	12	9	(GA)3-(T)6	coding
Synechococcus sp. MU1617	88	CT-GC	2	12	2	(CT)3-(GC)3	coding
Synechococcus sp. MU1617	89	AG-GTT	2	15	2	(AG)3-(GTT)3	noncoding
Synechococcus sp. MU1617	90	GT-G	2	12	3	(GT)3-(G)6	coding
Synechococcus sp. MU1617	91	GC-TCC	2	17	4	(GC)4-(TCC)3	coding
Synechococcus sp. MU1617	92	CAG-TGC	2	18	7	(CAG)3-(TGC)3	coding
Synechococcus sp. MU1617	93	GGC-TGC-T	3	28	8	(GGC)3-(TGC)4-(T)7	coding
Synechococcus sp. MU1617	94	TC-GC	2	12	7	(TC)3-(GC)3	noncoding
Synechococcus sp. MU1617	95	T-CT	2	13	0	(T)7-(CT)3	coding
Synechococcus sp. MU1617	96	A-TC	2	13	6	(A)7-(TC)3	coding
Synechococcus sp. MU1617	97	GT-TA-A	3	20	8	(GT)3-(TA)4-(A)6	coding
Synechococcus sp. MU1617	98	GC-TA	2	12	5	(GC)3-(TA)3	coding
Synechococcus sp. MU1617	99	T-AT	2	14	1	(T)6-(AT)4	coding
Synechococcus sp. MU1617	100	AT-GT	2	14	3	(AT)3-(GT)4	coding
Synechococcus sp. MU1617	101	GT-CT	2	12	2	(GT)3-(CT)3	coding
Synechococcus sp. MU1617	102	TC-T	2	12	3	(TC)3-(T)6	coding
Synechococcus sp. MU1617	103	GT-T	2	12	7	(GT)3-(T)6	coding
Synechococcus sp. MU1617	104	CA-TC	2	12	2	(CA)3-(TC)3	coding
Synechococcus sp. MU1617	105	GCG-CG	2	15	1	(GCG)3-(CG)3	coding
Synechococcus sp. MU1617	106	GA-A-C	3	18	4	(GA)3-(A)6-(C)6	noncoding
Synechococcus sp. MU1617	107	G-G	2	13	5	(G)6-(G)7	coding
Synechococcus sp. MU1617	108	C-GA	2	12	8	(C)6-(GA)3	coding
Synechococcus sp. MU1617	109	G-GA	2	13	10	(G)7-(GA)3	coding
Synechococcus sp. MU1617	110	GA-CAC	2	15	2	(GA)3-(CAC)3	coding
Synechococcus sp. MU1617	111	GTC-ACC	2	18	1	(GTC)3-(ACC)3	coding
Synechococcus sp. MU1617	112	T-TTC	2	15	2	(T)6-(TTC)3	coding
Synechococcus sp. MU1617	113	T-CT	2	12	5	(T)6-(CT)3	coding
Synechococcus sp. MU1617	114	GT-T	2	12	7	(GT)3-(T)6	coding
Synechococcus sp. MU1617	115	C-CCG	2	16	9	(C)7-(CCG)3	noncoding
Synechococcus sp. MU1617	116	GCC-CGA	2	18	2	(GCC)3-(CGA)3	coding
Synechococcus sp. MU1617	117	A-G	2	14	0	(A)8-(G)6	noncoding
Synechococcus sp. MU1617	118	GGT-GC	2	17	9	(GGT)3-(GC)4	coding
Synechococcus sp. MU1617	119	TCG-GTC	2	18	5	(TCG)3-(GTC)3	coding
Synechococcus sp. MU1617	120	T-T-AT	3	18	5	(T)6-(T)6-(AT)3	coding
Synechococcus sp. MU1617	121	C-CT	2	14	2	(C)6-(CT)4	noncoding
Synechococcus sp. MU1617	122	GC-GC	2	12	3	(GC)3-(GC)3	coding
Synechococcus sp. MU1617	123	CG-A	2	14	0	(CG)4-(A)6	coding
Synechococcus sp. MU1617	124	CT-C	2	12	4	(CT)3-(C)6	noncoding
Synechococcus sp. MU1617	125	CAA-AG	2	15	3	(CAA)3-(AG)3	noncoding
Synechococcus sp. MU1617	126	AAC-CT	2	15	6	(AAC)3-(CT)3	coding
Synechococcus sp. MU1617	127	AC-A	2	12	4	(AC)3-(A)6	noncoding
Synechococcus sp. MU1617	128	GC-GCT	2	15	2	(GC)3-(GCT)3	coding
Synechococcus sp. MU1617	129	TG-CAC	2	15	4	(TG)3-(CAC)3	coding
Synechococcus sp. MU1617	130	A-CCA	2	15	10	(A)6-(CCA)3	coding
Synechococcus sp. MU1617	131	GC-T	2	12	4	(GC)3-(T)6	coding
Synechococcus sp. MU1617	132	AG-AG	2	12	9	(AG)3-(AG)3	coding
Synechococcus sp. MU1617	133	AGC-CG	2	15	6	(AGC)3-(CG)3	coding
Synechococcus sp. MU1617	134	C-GCA	2	15	3	(C)6-(GCA)3	noncoding
Synechococcus sp. MU1617	135	CTG-T	2	15	1	(CTG)3-(T)6	noncoding
Synechococcus sp. MU1617	136	TGG-GT	2	15	4	(TGG)3-(GT)3	coding
Synechococcus sp. MU1617	137	GA-G	2	12	1	(GA)3-(G)6	coding
Synechococcus sp. MU1617	138	A-CA	2	12	8	(A)6-(CA)3	coding
Synechococcus sp. MU1617	139	T-GC	2	12	5	(T)6-(GC)3	coding
Synechococcus sp. MU1617	140	AG-CAG	2	15	4	(AG)3-(CAG)3	coding
Synechococcus sp. MU1617	141	CAC-GA	2	15	1	(CAC)3-(GA)3	coding
Synechococcus sp. MU1617	142	G-AG	2	12	0	(G)6-(AG)3	coding
Synechococcus sp. MU1617	143	CA-T	2	13	0	(CA)3-(T)7	coding
Synechococcus sp. MU1617	144	ACC-T	2	15	1	(ACC)3-(T)6	coding
Synechococcus sp. MU1617	145	GCT-G	2	16	0	(GCT)3-(G)7	coding
Synechococcus sp. MU1617	146	GA-G	2	12	3	(GA)3-(G)6	coding
Synechococcus sp. MU1617	147	AG-AT	2	12	5	(AG)3-(AT)3	coding
Synechococcus sp. MU1617	148	CT-A	2	12	7	(CT)3-(A)6	coding
Synechococcus sp. MU1617	149	AG-G	2	12	6	(AG)3-(G)6	coding
Synechococcus sp. MU1617	150	CG-C	2	12	6	(CG)3-(C)6	coding
Synechococcus sp. MU1617	151	A-C-G	3	19	3	(A)7-(C)6-(G)6	noncoding
Synechococcus sp. MU1617	152	CAG-C	2	17	4	(CAG)3-(C)8	coding
Synechococcus sp. MU1617	153	C-CTG	2	15	10	(C)6-(CTG)3	coding
Synechococcus sp. MU1617	154	GA-GC	2	12	6	(GA)3-(GC)3	coding
Synechococcus sp. MU1617	155	G-G	2	12	7	(G)6-(G)6	coding
Synechococcus sp. MU1617	156	CAA-GC	2	15	2	(CAA)3-(GC)3	coding
Synechococcus sp. MU1617	157	AGC-CAG	2	18	2	(AGC)3-(CAG)3	coding
Synechococcus sp. MU1617	158	GC-CGT	2	15	4	(GC)3-(CGT)3	coding
Synechococcus sp. MU1617	159	C-CCA	2	15	1	(C)6-(CCA)3	coding
Synechococcus sp. MU1617	160	TGG-GT	2	15	4	(TGG)3-(GT)3	coding
Synechococcus sp. MU1617	161	GC-GCA	2	15	5	(GC)3-(GCA)3	coding
Synechococcus sp. MU1617	162	CAC-T	2	16	4	(CAC)3-(T)7	coding
Synechococcus sp. MU1617	163	GC-G	2	12	9	(GC)3-(G)6	coding
Parasynechococcus sp. CC9902	1	GGC-CGG	2	21	8	(GGC)4-(CGG)3	coding
Parasynechococcus sp. CC9902	2	GGC-CGG	2	21	8	(GGC)4-(CGG)3	coding
Parasynechococcus sp. CC9902	3	T-T	2	12	6	(T)6-(T)6	coding
Parasynechococcus sp. CC9902	4	A-A	2	12	6	(A)6-(A)6	coding
Parasynechococcus sp. CC9902	5	A-T	2	13	0	(A)7-(T)6	noncoding
Parasynechococcus sp. CC9902	6	A-A	2	12	3	(A)6-(A)6	coding
Parasynechococcus sp. CC9902	7	CA-T	2	12	9	(CA)3-(T)6	coding
Parasynechococcus sp. CC9902	8	TA-CT	2	14	6	(TA)3-(CT)4	coding
Parasynechococcus sp. CC9902	9	CGT-T	2	16	6	(CGT)3-(T)7	coding
Parasynechococcus sp. CC9902	10	TC-T	2	12	5	(TC)3-(T)6	coding
Parasynechococcus sp. CC9902	11	TA-TA	2	12	5	(TA)3-(TA)3	coding
Parasynechococcus sp. CC9902	12	T-T-A	3	21	17	(T)8-(T)7-(A)6	coding
Parasynechococcus sp. CC9902	13	TA-T	2	14	1	(TA)3-(T)8	coding
Parasynechococcus sp. CC9902	14	T-AT	2	12	8	(T)6-(AT)3	coding
Parasynechococcus sp. CC9902	15	T-T	2	15	5	(T)7-(T)8	noncoding
Parasynechococcus sp. CC9902	16	TC-T	2	14	6	(TC)4-(T)6	coding
Parasynechococcus sp. CC9902	17	T-CTT	2	17	1	(T)8-(CTT)3	coding
Parasynechococcus sp. CC9902	18	TC-TA	2	16	3	(TC)4-(TA)4	coding
Parasynechococcus sp. CC9902	19	T-T	2	12	10	(T)6-(T)6	coding
Parasynechococcus sp. CC9902	20	GA-TC-T	3	19	10	(GA)3-(TC)3-(T)7	coding
Parasynechococcus sp. CC9902	21	A-TC	2	14	7	(A)6-(TC)4	coding
Parasynechococcus sp. CC9902	22	TC-C	2	15	3	(TC)3-(C)9	noncoding
Parasynechococcus sp. CC9902	23	T-A	2	12	7	(T)6-(A)6	coding
Parasynechococcus sp. CC9902	24	T-G	2	12	5	(T)6-(G)6	coding
Parasynechococcus sp. CC9902	25	GT-G	2	12	8	(GT)3-(G)6	coding
Parasynechococcus sp. CC9902	26	A-TGG	2	15	10	(A)6-(TGG)3	coding
Parasynechococcus sp. CC9902	27	GGC-T	2	15	9	(GGC)3-(T)6	coding
Parasynechococcus sp. CC9902	28	AG-CT	2	12	4	(AG)3-(CT)3	coding
Parasynechococcus sp. CC9902	29	T-CG	2	12	10	(T)6-(CG)3	noncoding
Parasynechococcus sp. CC9902	30	T-C	2	12	1	(T)6-(C)6	coding
Parasynechococcus sp. CC9902	31	CA-A	2	12	10	(CA)3-(A)6	coding
Parasynechococcus sp. CC9902	32	AG-GC	2	12	5	(AG)3-(GC)3	coding
Parasynechococcus sp. CC9902	33	CA-AG	2	12	8	(CA)3-(AG)3	coding
Parasynechococcus sp. CC9902	34	GGT-AC	2	15	3	(GGT)3-(AC)3	coding
Parasynechococcus sp. CC9902	35	GA-A	2	12	10	(GA)3-(A)6	noncoding
Parasynechococcus sp. CC9902	36	G-GC	2	12	2	(G)6-(GC)3	coding
Parasynechococcus sp. CC9902	37	CT-T	2	12	2	(CT)3-(T)6	noncoding
Parasynechococcus sp. CC9902	38	C-G-T	3	22	4	(C)9-(G)7-(T)6	noncoding
Parasynechococcus sp. CC9902	39	CT-GC	2	12	4	(CT)3-(GC)3	coding
Parasynechococcus sp. CC9902	40	T-TC	2	12	6	(T)6-(TC)3	coding
Parasynechococcus sp. CC9902	41	GA-GC	2	12	3	(GA)3-(GC)3	noncoding
Parasynechococcus sp. CC9902	42	A-C	2	12	0	(A)6-(C)6	noncoding
Parasynechococcus sp. CC9902	43	T-TGG	2	15	8	(T)6-(TGG)3	noncoding
Parasynechococcus sp. CC9902	44	CA-GT	2	12	3	(CA)3-(GT)3	coding
Parasynechococcus sp. CC9902	45	GT-CCA	2	15	0	(GT)3-(CCA)3	coding
Parasynechococcus sp. CC9902	46	C-TC	2	15	0	(C)7-(TC)4	coding
Parasynechococcus sp. CC9902	47	GTC-GAC	2	18	0	(GTC)3-(GAC)3	coding
Parasynechococcus sp. CC9902	48	AG-GA-GT	3	18	2	(AG)3-(GA)3-(GT)3	noncoding
Parasynechococcus sp. CC9902	49	TTG-A	2	16	8	(TTG)3-(A)7	noncoding
Parasynechococcus sp. CC9902	50	T-TA	2	14	1	(T)8-(TA)3	noncoding
Parasynechococcus sp. CC9902	51	A-T	2	12	0	(A)6-(T)6	noncoding
Parasynechococcus sp. CC9902	52	T-T	2	15	4	(T)8-(T)7	coding
Parasynechococcus sp. CC9902	53	GTT-A	2	15	0	(GTT)3-(A)6	noncoding
Parasynechococcus sp. CC9902	54	A-A	2	12	4	(A)6-(A)6	noncoding
Parasynechococcus sp. CC9902	55	A-TC	2	12	2	(A)6-(TC)3	coding
Parasynechococcus sp. CC9902	56	T-T	2	13	4	(T)6-(T)7	coding
Parasynechococcus sp. CC9902	57	T-T	2	12	1	(T)6-(T)6	noncoding
Parasynechococcus sp. CC9902	58	A-A	2	13	9	(A)7-(A)6	noncoding
Parasynechococcus sp. CC9902	59	GT-G	2	12	10	(GT)3-(G)6	coding
Parasynechococcus sp. CC9902	60	AG-T	2	12	3	(AG)3-(T)6	coding
Parasynechococcus sp. CC9902	61	T-GC	2	12	6	(T)6-(GC)3	coding
Parasynechococcus sp. CC9902	62	TGT-C	2	16	1	(TGT)3-(C)7	coding
Parasynechococcus sp. CC9902	63	T-A	2	12	0	(T)6-(A)6	coding
Parasynechococcus sp. CC9902	64	CCG-GCC	2	18	8	(CCG)3-(GCC)3	coding
Parasynechococcus sp. CC9902	65	GTG-C	2	15	9	(GTG)3-(C)6	coding
Parasynechococcus sp. CC9902	66	TA-T	2	12	6	(TA)3-(T)6	noncoding
Parasynechococcus sp. CC9902	67	TG-G	2	12	3	(TG)3-(G)6	coding
Parasynechococcus sp. CC9902	68	GGA-C	2	15	7	(GGA)3-(C)6	coding
Parasynechococcus sp. CC9902	69	GA-C	2	12	7	(GA)3-(C)6	coding
Parasynechococcus sp. CC9902	70	T-G	2	12	0	(T)6-(G)6	coding
Parasynechococcus sp. CC9902	71	GC-GC	2	12	1	(GC)3-(GC)3	coding
Parasynechococcus sp. CC9902	72	AG-GC	2	12	5	(AG)3-(GC)3	coding
Parasynechococcus sp. CC9902	73	T-GTT	2	15	1	(T)6-(GTT)3	coding
Parasynechococcus sp. CC9902	74	GC-TCA	2	15	5	(GC)3-(TCA)3	coding
Parasynechococcus sp. CC9902	75	G-GA	2	12	4	(G)6-(GA)3	coding
Parasynechococcus sp. CC9902	76	GT-A	2	12	6	(GT)3-(A)6	coding
Parasynechococcus sp. CC9902	77	GT-G	2	12	8	(GT)3-(G)6	coding
Parasynechococcus sp. CC9902	78	T-A-GC	3	18	8	(T)6-(A)6-(GC)3	noncoding
Parasynechococcus sp. CC9902	79	CT-TC	2	12	0	(CT)3-(TC)3	coding
Parasynechococcus sp. CC9902	80	A-TACT	2	18	0	(A)6-(TACT)3	coding
Parasynechococcus sp. CC9902	81	TG-GAG	2	15	4	(TG)3-(GAG)3	coding
Parasynechococcus sp. CC9902	82	T-AT	2	12	5	(T)6-(AT)3	coding
Parasynechococcus sp. CC9902	83	T-CG	2	12	1	(T)6-(CG)3	coding
Parasynechococcus sp. CC9902	84	T-A	2	12	7	(T)6-(A)6	noncoding
Parasynechococcus sp. CC9902	85	TG-GC	2	14	9	(TG)4-(GC)3	coding
Parasynechococcus sp. CC9902	86	CCA-TGG	2	18	2	(CCA)3-(TGG)3	coding
Parasynechococcus sp. CC9902	87	A-A	2	12	10	(A)6-(A)6	coding
Parasynechococcus sp. CC9902	88	CT-CCA	2	15	8	(CT)3-(CCA)3	coding
Parasynechococcus sp. CC9902	89	GGA-CG	2	15	7	(GGA)3-(CG)3	coding
Parasynechococcus sp. CC9902	90	TC-G	2	12	9	(TC)3-(G)6	coding
Parasynechococcus sp. CC9902	91	G-CT	2	12	10	(G)6-(CT)3	coding
Parasynechococcus sp. CC9902	92	CT-G	2	13	2	(CT)3-(G)7	coding
Parasynechococcus sp. CC9902	93	A-AG	2	12	2	(A)6-(AG)3	noncoding
Parasynechococcus sp. CC9902	94	TC-AG	2	14	9	(TC)3-(AG)4	coding
Parasynechococcus sp. CC9902	95	T-GC	2	12	1	(T)6-(GC)3	coding
Parasynechococcus sp. CC9902	96	TATT-AC	2	18	9	(TATT)3-(AC)3	noncoding
Parasynechococcus sp. CC9902	97	T-CTGGG	2	22	4	(T)7-(CTGGG)3	coding
Parasynechococcus sp. CC9902	98	TG-GT	2	12	3	(TG)3-(GT)3	noncoding
Parasynechococcus sp. CC9902	99	G-T	2	12	3	(G)6-(T)6	coding
Parasynechococcus sp. CC9902	100	T-A	2	12	4	(T)6-(A)6	noncoding
Parasynechococcus sp. CC9902	101	T-CT	2	12	4	(T)6-(CT)3	noncoding
Parasynechococcus sp. CC9902	102	TTG-GA	2	15	0	(TTG)3-(GA)3	coding
Parasynechococcus sp. CC9902	103	A-G	2	14	0	(A)8-(G)6	noncoding
Parasynechococcus sp. CC9902	104	G-T	2	12	8	(G)6-(T)6	coding
Parasynechococcus sp. CC9902	105	CG-AAC	2	15	6	(CG)3-(AAC)3	coding
Parasynechococcus sp. CC9902	106	GT-GC	2	14	10	(GT)3-(GC)4	coding
Parasynechococcus sp. CC9902	107	T-GC	2	12	6	(T)6-(GC)3	coding
Parasynechococcus sp. CC9902	108	G-GA	2	13	7	(G)7-(GA)3	noncoding
Parasynechococcus sp. CC9902	109	GA-T	2	12	4	(GA)3-(T)6	noncoding
Parasynechococcus sp. CC9902	110	ATT-AAT	2	18	4	(ATT)3-(AAT)3	noncoding
Parasynechococcus sp. CC9902	111	T-T-AT	3	19	16	(T)7-(T)6-(AT)3	coding
Parasynechococcus sp. CC9902	112	G-GGT	2	15	8	(G)6-(GGT)3	coding
Parasynechococcus sp. CC9902	113	A-T	2	12	9	(A)6-(T)6	coding
Parasynechococcus sp. CC9902	114	GT-A	2	12	9	(GT)3-(A)6	coding
Parasynechococcus sp. CC9902	115	T-GCA	2	15	0	(T)6-(GCA)3	coding
Parasynechococcus sp. CC9902	116	CAA-AT	2	15	2	(CAA)3-(AT)3	coding
Parasynechococcus sp. CC9902	117	TGG-TGA	2	21	9	(TGG)4-(TGA)3	coding
Parasynechococcus sp. CC9902	118	AG-A	2	15	10	(AG)3-(A)9	noncoding
Parasynechococcus sp. CC9902	119	TC-TC	2	12	7	(TC)3-(TC)3	coding
Parasynechococcus sp. CC9902	120	GA-CAG	2	15	3	(GA)3-(CAG)3	coding
Parasynechococcus sp. CC9902	121	TCT-AT	2	15	6	(TCT)3-(AT)3	coding
Parasynechococcus sp. CC9902	122	CG-A	2	12	10	(CG)3-(A)6	noncoding
Parasynechococcus sp. CC9902	123	AC-A	2	13	3	(AC)3-(A)7	coding
Parasynechococcus sp. CC9902	124	ACA-GTG	2	18	8	(ACA)3-(GTG)3	coding
Parasynechococcus sp. CC9902	125	CTT-T	2	15	10	(CTT)3-(T)6	coding
Parasynechococcus sp. CC9902	126	GC-CA	2	12	8	(GC)3-(CA)3	noncoding
Parasynechococcus sp. CC9902	127	CA-AG	2	12	6	(CA)3-(AG)3	coding
Parasynechococcus sp. CC9902	128	AG-TGC	2	15	3	(AG)3-(TGC)3	noncoding
Parasynechococcus sp. CC9902	129	A-A	2	12	9	(A)6-(A)6	coding
Parasynechococcus sp. CC9902	130	GA-A	2	15	8	(GA)3-(A)9	noncoding
Parasynechococcus sp. CC9902	131	CA-A	2	12	4	(CA)3-(A)6	coding
Parasynechococcus sp. CC9902	132	AGC-T	2	15	0	(AGC)3-(T)6	coding
Parasynechococcus sp. CC9902	133	GT-GCT	2	15	8	(GT)3-(GCT)3	coding
Parasynechococcus sp. CC9902	134	CG-C	2	13	7	(CG)3-(C)7	coding
Parasynechococcus sp. CC9902	135	GC-T	2	12	3	(GC)3-(T)6	coding
Parasynechococcus sp. CC9902	136	CTG-CT	2	15	6	(CTG)3-(CT)3	coding
Parasynechococcus sp. CC9902	137	GC-G	2	12	9	(GC)3-(G)6	coding
Parasynechococcus sp. CC9902	138	T-CA	2	12	10	(T)6-(CA)3	coding
Parasynechococcus sp. CC9902	139	TC-AC	2	12	7	(TC)3-(AC)3	coding
Parasynechococcus sp. CC9902	140	A-CAA	2	16	5	(A)7-(CAA)3	noncoding
Parasynechococcus sp. CC9902	141	G-AGC	2	15	10	(G)6-(AGC)3	coding
Parasynechococcus sp. CC9902	142	CTG-GT	2	15	10	(CTG)3-(GT)3	coding
Parasynechococcus sp. CC9902	143	TG-AC	2	12	6	(TG)3-(AC)3	coding
Parasynechococcus sp. CC9902	144	CG-AC	2	12	7	(CG)3-(AC)3	coding
Parasynechococcus sp. CC9902	145	GT-CA-G	3	18	6	(GT)3-(CA)3-(G)6	noncoding
Parasynechococcus sp. CC9902	146	C-AGC	2	15	4	(C)6-(AGC)3	noncoding
Parasynechococcus sp. CC9902	147	TA-A	2	12	1	(TA)3-(A)6	noncoding
Parasynechococcus sp. CC9902	148	CG-A	2	12	10	(CG)3-(A)6	coding
Parasynechococcus sp. CC9902	149	G-CAC	2	18	7	(G)9-(CAC)3	coding
Parasynechococcus sp. CC9902	150	GC-GCA	2	15	7	(GC)3-(GCA)3	coding
Parasynechococcus sp. CC9902	151	GAC-C	2	15	2	(GAC)3-(C)6	coding
Parasynechococcus sp. CC9902	152	C-T	2	13	0	(C)6-(T)7	noncoding
Parasynechococcus sp. CC9902	153	T-TC	2	12	7	(T)6-(TC)3	coding
Parasynechococcus sp. CC9902	154	A-TGA-GC	3	22	11	(A)7-(TGA)3-(GC)3	coding
Parasynechococcus sp. CC9902	155	ACC-A	2	15	6	(ACC)3-(A)6	coding
Parasynechococcus sp. CC9902	156	AGA-AGA	2	18	6	(AGA)3-(AGA)3	coding
Parasynechococcus sp. CC9902	157	G-T	2	12	5	(G)6-(T)6	coding
Parasynechococcus sp. CC9902	158	GT-CA	2	12	6	(GT)3-(CA)3	noncoding
Parasynechococcus sp. CC9902	159	A-A	2	12	4	(A)6-(A)6	coding
Parasynechococcus sp. CC9902	160	TTC-TC	2	15	10	(TTC)3-(TC)3	coding
Parasynechococcus sp. CC9902	161	GC-TC	2	12	3	(GC)3-(TC)3	noncoding
Parasynechococcus sp. CC9902	162	GCC-T	2	15	7	(GCC)3-(T)6	coding
Parasynechococcus sp. CC9902	163	AC-G	2	12	9	(AC)3-(G)6	coding
Parasynechococcus sp. CC9902	164	CT-AG	2	14	3	(CT)3-(AG)4	coding
Parasynechococcus sp. CC9902	165	A-A	2	14	7	(A)6-(A)8	noncoding
Parasynechococcus sp. CC9902	166	GA-GA	2	12	5	(GA)3-(GA)3	noncoding
Parasynechococcus sp. CC9902	167	T-CA	2	13	1	(T)7-(CA)3	coding
Parasynechococcus sp. CC9902	168	G-GT	2	12	1	(G)6-(GT)3	noncoding
Parasynechococcus sp. CC9902	169	T-GC	2	13	3	(T)7-(GC)3	coding
Parasynechococcus sp. CC9902	170	C-CAG	2	15	6	(C)6-(CAG)3	coding
Parasynechococcus sp. CC9902	171	CGA-T	2	15	3	(CGA)3-(T)6	coding
Parasynechococcus sp. CC9902	172	CT-GTG	2	15	5	(CT)3-(GTG)3	coding
Parasynechococcus sp. CC9902	173	T-ACG	2	15	4	(T)6-(ACG)3	coding
Parasynechococcus sp. CC9902	174	GC-A	2	13	7	(GC)3-(A)7	coding
Parasynechococcus sp. CC9902	175	GTG-A	2	18	7	(GTG)4-(A)6	coding
Parasynechococcus sp. CC9902	176	GA-TC	2	12	1	(GA)3-(TC)3	coding
Parasynechococcus sp. CC9902	177	C-AG	2	13	9	(C)7-(AG)3	coding
Parasynechococcus sp. CC9902	178	T-TA	2	12	2	(T)6-(TA)3	noncoding
Parasynechococcus sp. CC9902	179	CA-A	2	12	3	(CA)3-(A)6	noncoding
Parasynechococcus sp. CC9902	180	T-A	2	13	1	(T)7-(A)6	noncoding
Parasynechococcus sp. CC9902	181	TC-A	2	12	4	(TC)3-(A)6	coding
Parasynechococcus sp. CC9902	182	G-C	2	13	7	(G)6-(C)7	noncoding
Parasynechococcus sp. CC9902	183	CA-GC	2	12	7	(CA)3-(GC)3	coding
Parasynechococcus sp. CC9902	184	GC-GA	2	12	3	(GC)3-(GA)3	noncoding
Parasynechococcus sp. CC9902	185	CG-AC	2	12	3	(CG)3-(AC)3	coding
Parasynechococcus sp. CC9902	186	C-GC	2	12	8	(C)6-(GC)3	coding
Parasynechococcus sp. CC9902	187	GC-GC	2	14	5	(GC)3-(GC)4	coding
Parasynechococcus sp. CC9902	188	TCA-T	2	15	5	(TCA)3-(T)6	coding
Parasynechococcus sp. CC9902	189	C-GA	2	12	4	(C)6-(GA)3	coding
Parasynechococcus sp. CC9902	190	T-GT	2	12	0	(T)6-(GT)3	noncoding
Parasynechococcus sp. CC9902	191	A-C	2	12	4	(A)6-(C)6	noncoding
Parasynechococcus sp. CC9902	192	A-AC-TCA	3	22	11	(A)7-(AC)3-(TCA)3	noncoding
Parasynechococcus sp. CC9902	193	G-AGCA	2	18	6	(G)6-(AGCA)3	coding
Parasynechococcus sp. CC9902	194	GCA-GAG	2	18	2	(GCA)3-(GAG)3	coding
Parasynechococcus sp. CC9902	195	CA-CA	2	12	6	(CA)3-(CA)3	coding
Parasynechococcus sp. CC9902	196	AGC-CAA	2	18	8	(AGC)3-(CAA)3	coding
Parasynechococcus sp. CC9902	197	G-T	2	14	1	(G)8-(T)6	coding
Parasynechococcus sp. CC9902	198	GTG-G	2	15	2	(GTG)3-(G)6	coding
Parasynechococcus sp. BL107	1	CTG-A	2	15	0	(CTG)3-(A)6	coding
Parasynechococcus sp. BL107	2	G-G	2	13	10	(G)7-(G)6	coding
Parasynechococcus sp. BL107	3	A-GA	2	12	1	(A)6-(GA)3	coding
Parasynechococcus sp. BL107	4	A-C-G	3	19	5	(A)7-(C)6-(G)6	noncoding
Parasynechococcus sp. BL107	5	CT-A	2	12	1	(CT)3-(A)6	coding
Parasynechococcus sp. BL107	6	A-AG	2	12	7	(A)6-(AG)3	noncoding
Parasynechococcus sp. BL107	7	AGC-AC	2	15	7	(AGC)3-(AC)3	coding
Parasynechococcus sp. BL107	8	GT-CAC	2	15	2	(GT)3-(CAC)3	coding
Parasynechococcus sp. BL107	9	GAA-TC	2	15	2	(GAA)3-(TC)3	coding
Parasynechococcus sp. BL107	10	T-CAA	2	15	0	(T)6-(CAA)3	coding
Parasynechococcus sp. BL107	11	A-A	2	12	2	(A)6-(A)6	noncoding
Parasynechococcus sp. BL107	12	CA-GA	2	12	5	(CA)3-(GA)3	coding
Parasynechococcus sp. BL107	13	ACA-A	2	15	9	(ACA)3-(A)6	coding
Parasynechococcus sp. BL107	14	AG-AT	2	14	9	(AG)3-(AT)4	coding
Parasynechococcus sp. BL107	15	AT-T	2	13	0	(AT)3-(T)7	coding
Parasynechococcus sp. BL107	16	A-TA	2	12	8	(A)6-(TA)3	coding
Parasynechococcus sp. BL107	17	A-AAC	2	15	9	(A)6-(AAC)3	noncoding
Parasynechococcus sp. BL107	18	AT-TA	2	12	9	(AT)3-(TA)3	noncoding
Parasynechococcus sp. BL107	19	AG-A	2	12	0	(AG)3-(A)6	coding
Parasynechococcus sp. BL107	20	AT-AT	2	12	7	(AT)3-(AT)3	coding
Parasynechococcus sp. BL107	21	AT-AG	2	12	5	(AT)3-(AG)3	noncoding
Parasynechococcus sp. BL107	22	AG-TA	2	12	6	(AG)3-(TA)3	noncoding
Parasynechococcus sp. BL107	23	CA-AT	2	12	7	(CA)3-(AT)3	coding
Parasynechococcus sp. BL107	24	TA-AT	2	14	0	(TA)4-(AT)3	noncoding
Parasynechococcus sp. BL107	25	A-CA	2	12	0	(A)6-(CA)3	coding
Parasynechococcus sp. BL107	26	TC-AAT	2	15	3	(TC)3-(AAT)3	noncoding
Parasynechococcus sp. BL107	27	TG-T	2	12	0	(TG)3-(T)6	coding
Parasynechococcus sp. BL107	28	AT-T	2	12	0	(AT)3-(T)6	noncoding
Parasynechococcus sp. BL107	29	CCA-T	2	15	10	(CCA)3-(T)6	coding
Parasynechococcus sp. BL107	30	AGC-TC	2	15	4	(AGC)3-(TC)3	coding
Parasynechococcus sp. BL107	31	C-A	2	12	5	(C)6-(A)6	coding
Parasynechococcus sp. BL107	32	GTA-T	2	15	9	(GTA)3-(T)6	coding
Parasynechococcus sp. BL107	33	AC-A	2	12	0	(AC)3-(A)6	noncoding
Parasynechococcus sp. BL107	34	AC-CT-CGT	3	23	5	(AC)3-(CT)4-(CGT)3	coding
Parasynechococcus sp. BL107	35	CGC-TC	2	17	0	(CGC)3-(TC)4	coding
Parasynechococcus sp. BL107	36	A-TC	2	12	9	(A)6-(TC)3	coding
Parasynechococcus sp. BL107	37	T-A	2	12	4	(T)6-(A)6	coding
Parasynechococcus sp. BL107	38	TG-CT	2	12	9	(TG)3-(CT)3	noncoding
Parasynechococcus sp. BL107	39	CCA-CCG	2	18	0	(CCA)3-(CCG)3	coding
Parasynechococcus sp. BL107	40	AC-GTT	2	15	2	(AC)3-(GTT)3	coding
Parasynechococcus sp. BL107	41	C-CAC	2	15	2	(C)6-(CAC)3	coding
Parasynechococcus sp. BL107	42	CT-T	2	13	9	(CT)3-(T)7	noncoding
Parasynechococcus sp. BL107	43	GT-A	2	12	5	(GT)3-(A)6	coding
Parasynechococcus sp. BL107	44	AG-T	2	13	0	(AG)3-(T)7	coding
Parasynechococcus sp. BL107	45	CT-GT	2	12	9	(CT)3-(GT)3	coding
Parasynechococcus sp. BL107	46	GC-G	2	12	8	(GC)3-(G)6	coding
Parasynechococcus sp. BL107	47	T-AC	2	12	3	(T)6-(AC)3	coding
Parasynechococcus sp. BL107	48	TG-G	2	12	3	(TG)3-(G)6	coding
Parasynechococcus sp. BL107	49	TC-GC	2	12	3	(TC)3-(GC)3	noncoding
Parasynechococcus sp. BL107	50	CT-GC	2	12	1	(CT)3-(GC)3	coding
Parasynechococcus sp. BL107	51	GC-TG	2	12	7	(GC)3-(TG)3	coding
Parasynechococcus sp. BL107	52	G-C	2	13	7	(G)7-(C)6	noncoding
Parasynechococcus sp. BL107	53	TGG-GT	2	15	8	(TGG)3-(GT)3	coding
Parasynechococcus sp. BL107	54	GC-AC	2	12	1	(GC)3-(AC)3	coding
Parasynechococcus sp. BL107	55	T-CAC	2	18	7	(T)6-(CAC)4	coding
Parasynechococcus sp. BL107	56	T-GC	2	13	7	(T)7-(GC)3	coding
Parasynechococcus sp. BL107	57	GC-GC	2	12	3	(GC)3-(GC)3	coding
Parasynechococcus sp. BL107	58	TCG-A	2	18	5	(TCG)4-(A)6	coding
Parasynechococcus sp. BL107	59	CAC-AG	2	15	5	(CAC)3-(AG)3	coding
Parasynechococcus sp. BL107	60	AG-GC	2	12	0	(AG)3-(GC)3	coding
Parasynechococcus sp. BL107	61	TG-A	2	12	1	(TG)3-(A)6	coding
Parasynechococcus sp. BL107	62	AT-A	2	12	7	(AT)3-(A)6	noncoding
Parasynechococcus sp. BL107	63	T-TGA-T	3	23	8	(T)8-(TGA)3-(T)6	noncoding
Parasynechococcus sp. BL107	64	CT-AG	2	14	3	(CT)4-(AG)3	coding
Parasynechococcus sp. BL107	65	C-GT	2	13	9	(C)7-(GT)3	coding
Parasynechococcus sp. BL107	66	A-GGC	2	15	7	(A)6-(GGC)3	coding
Parasynechococcus sp. BL107	67	GT-AC	2	12	7	(GT)3-(AC)3	coding
Parasynechococcus sp. BL107	68	G-C	2	13	4	(G)6-(C)7	coding
Parasynechococcus sp. BL107	69	C-T	2	14	9	(C)8-(T)6	coding
Parasynechococcus sp. BL107	70	T-T	2	15	6	(T)7-(T)8	noncoding
Parasynechococcus sp. BL107	71	G-GC	2	12	10	(G)6-(GC)3	coding
Parasynechococcus sp. BL107	72	TGT-G	2	15	3	(TGT)3-(G)6	coding
Parasynechococcus sp. BL107	73	TG-AC	2	12	6	(TG)3-(AC)3	noncoding
Parasynechococcus sp. BL107	74	CGC-AC	2	15	6	(CGC)3-(AC)3	coding
Parasynechococcus sp. BL107	75	GT-TA	2	12	7	(GT)3-(TA)3	coding
Parasynechococcus sp. BL107	76	TG-AC	2	12	6	(TG)3-(AC)3	coding
Parasynechococcus sp. BL107	77	TGC-C	2	15	0	(TGC)3-(C)6	coding
Parasynechococcus sp. BL107	78	T-GGT	2	15	6	(T)6-(GGT)3	coding
Parasynechococcus sp. BL107	79	A-AAC	2	15	10	(A)6-(AAC)3	coding
Parasynechococcus sp. BL107	80	TGT-AGA	2	18	1	(TGT)3-(AGA)3	coding
Parasynechococcus sp. BL107	81	CAA-CG	2	15	6	(CAA)3-(CG)3	coding
Parasynechococcus sp. BL107	82	CA-G	2	13	5	(CA)3-(G)7	noncoding
Parasynechococcus sp. BL107	83	GC-TCA-T	3	21	11	(GC)3-(TCA)3-(T)6	coding
Parasynechococcus sp. BL107	84	GA-A	2	12	7	(GA)3-(A)6	coding
Parasynechococcus sp. BL107	85	T-AT	2	12	5	(T)6-(AT)3	noncoding
Parasynechococcus sp. BL107	86	A-GT	2	14	9	(A)8-(GT)3	noncoding
Parasynechococcus sp. BL107	87	T-T	2	12	6	(T)6-(T)6	coding
Parasynechococcus sp. BL107	88	GCG-GGT	2	21	3	(GCG)4-(GGT)3	coding
Parasynechococcus sp. BL107	89	C-CAC	2	15	8	(C)6-(CAC)3	coding
Parasynechococcus sp. BL107	90	C-C	2	13	3	(C)6-(C)7	coding
Parasynechococcus sp. BL107	91	A-TC	2	12	0	(A)6-(TC)3	coding
Parasynechococcus sp. BL107	92	GT-T	2	14	10	(GT)4-(T)6	noncoding
Parasynechococcus sp. BL107	93	T-T	2	14	4	(T)8-(T)6	noncoding
Parasynechococcus sp. BL107	94	GA-A	2	12	7	(GA)3-(A)6	coding
Parasynechococcus sp. BL107	95	CT-CT	2	12	3	(CT)3-(CT)3	coding
Parasynechococcus sp. BL107	96	GCG-CTG	2	18	10	(GCG)3-(CTG)3	coding
Parasynechococcus sp. BL107	97	T-T	2	14	10	(T)7-(T)7	noncoding
Parasynechococcus sp. BL107	98	TGT-T	2	15	8	(TGT)3-(T)6	noncoding
Parasynechococcus sp. BL107	99	TG-A	2	12	10	(TG)3-(A)6	coding
Parasynechococcus sp. BL107	100	C-CT	2	12	4	(C)6-(CT)3	coding
Parasynechococcus sp. BL107	101	GCA-AGC	2	18	8	(GCA)3-(AGC)3	coding
Parasynechococcus sp. BL107	102	G-GA	2	12	7	(G)6-(GA)3	coding
Parasynechococcus sp. BL107	103	G-G	2	13	3	(G)6-(G)7	coding
Parasynechococcus sp. BL107	104	A-GC	2	12	3	(A)6-(GC)3	coding
Parasynechococcus sp. BL107	105	T-TGC	2	19	5	(T)7-(TGC)4	noncoding
Parasynechococcus sp. BL107	106	GCT-T-TCG	3	24	10	(GCT)3-(T)6-(TCG)3	coding
Parasynechococcus sp. BL107	107	TTG-GCT	2	18	2	(TTG)3-(GCT)3	coding
Parasynechococcus sp. BL107	108	A-GCT	2	15	0	(A)6-(GCT)3	coding
Parasynechococcus sp. BL107	109	AC-C	2	14	2	(AC)3-(C)8	noncoding
Parasynechococcus sp. BL107	110	G-AC	2	12	0	(G)6-(AC)3	coding
Parasynechococcus sp. BL107	111	GA-TG	2	12	4	(GA)3-(TG)3	noncoding
Parasynechococcus sp. BL107	112	A-AAG-CAC	3	24	14	(A)6-(AAG)3-(CAC)3	coding
Parasynechococcus sp. BL107	113	G-TTG	2	17	5	(G)8-(TTG)3	coding
Parasynechococcus sp. BL107	114	CCA-GTT-AGC	3	27	14	(CCA)3-(GTT)3-(AGC)3	coding
Parasynechococcus sp. BL107	115	CA-AG	2	12	6	(CA)3-(AG)3	coding
Parasynechococcus sp. BL107	116	CG-G	2	12	2	(CG)3-(G)6	coding
Parasynechococcus sp. BL107	117	G-CT	2	12	9	(G)6-(CT)3	coding
Parasynechococcus sp. BL107	118	TG-A	2	14	8	(TG)3-(A)8	noncoding
Parasynechococcus sp. BL107	119	CT-TG	2	12	0	(CT)3-(TG)3	noncoding
Parasynechococcus sp. BL107	120	GT-CT	2	14	3	(GT)4-(CT)3	coding
Parasynechococcus sp. BL107	121	CG-C	2	12	3	(CG)3-(C)6	coding
Parasynechococcus sp. BL107	122	T-CT	2	12	1	(T)6-(CT)3	coding
Parasynechococcus sp. BL107	123	T-CT	2	12	4	(T)6-(CT)3	noncoding
Parasynechococcus sp. BL107	124	T-GT	2	12	9	(T)6-(GT)3	noncoding
Parasynechococcus sp. BL107	125	TC-CCA	2	17	7	(TC)4-(CCA)3	coding
Parasynechococcus sp. BL107	126	TTG-GA	2	15	0	(TTG)3-(GA)3	coding
Parasynechococcus sp. BL107	127	T-TC	2	14	6	(T)8-(TC)3	noncoding
Parasynechococcus sp. BL107	128	C-C	2	12	2	(C)6-(C)6	coding
Parasynechococcus sp. BL107	129	AG-GC	2	12	10	(AG)3-(GC)3	noncoding
Parasynechococcus sp. BL107	130	CG-AAC	2	15	6	(CG)3-(AAC)3	coding
Parasynechococcus sp. BL107	131	T-T	2	14	2	(T)7-(T)7	noncoding
Parasynechococcus sp. BL107	132	CCAC-AAC-T	3	27	4	(CCAC)3-(AAC)3-(T)6	coding
Parasynechococcus sp. BL107	133	GA-T-TC	3	19	8	(GA)3-(T)7-(TC)3	noncoding
Parasynechococcus sp. BL107	134	CG-CGT	2	15	8	(CG)3-(CGT)3	coding
Parasynechococcus sp. BL107	135	CT-GA	2	12	3	(CT)3-(GA)3	coding
Parasynechococcus sp. BL107	136	G-GGT	2	15	8	(G)6-(GGT)3	noncoding
Parasynechococcus sp. BL107	137	AAC-AT	2	15	1	(AAC)3-(AT)3	coding
Parasynechococcus sp. BL107	138	TG-TG	2	14	10	(TG)4-(TG)3	coding
Parasynechococcus sp. BL107	139	AG-A	2	15	10	(AG)3-(A)9	noncoding
Parasynechococcus sp. BL107	140	TC-TC	2	12	7	(TC)3-(TC)3	coding
Parasynechococcus sp. BL107	141	A-AC	2	15	6	(A)9-(AC)3	noncoding
Parasynechococcus sp. BL107	142	GA-A	2	12	3	(GA)3-(A)6	coding
Parasynechococcus sp. BL107	143	T-CA	2	12	10	(T)6-(CA)3	coding
Parasynechococcus sp. BL107	144	G-C-A	3	18	11	(G)6-(C)6-(A)6	noncoding
Parasynechococcus sp. BL107	145	AC-A	2	12	8	(AC)3-(A)6	coding
Parasynechococcus sp. BL107	146	CGA-GC	2	15	0	(CGA)3-(GC)3	coding
Parasynechococcus sp. BL107	147	C-T	2	12	0	(C)6-(T)6	coding
Parasynechococcus sp. BL107	148	TG-CA	2	12	8	(TG)3-(CA)3	coding
Parasynechococcus sp. BL107	149	TC-GA	2	14	10	(TC)4-(GA)3	coding
Parasynechococcus sp. BL107	150	AT-T	2	12	1	(AT)3-(T)6	coding
Parasynechococcus sp. BL107	151	C-G-T	3	18	7	(C)6-(G)6-(T)6	noncoding
Parasynechococcus sp. BL107	152	GA-CT	2	12	7	(GA)3-(CT)3	noncoding
Parasynechococcus sp. BL107	153	C-AG	2	13	2	(C)7-(AG)3	coding
Parasynechococcus sp. BL107	154	ACT-GC	2	15	0	(ACT)3-(GC)3	coding
Parasynechococcus sp. BL107	155	AG-C	2	12	10	(AG)3-(C)6	coding
Parasynechococcus sp. BL107	156	CCA-G	2	15	8	(CCA)3-(G)6	coding
Parasynechococcus sp. BL107	157	A-G	2	12	0	(A)6-(G)6	coding
Parasynechococcus sp. BL107	158	CAT-T	2	18	8	(CAT)4-(T)6	coding
Parasynechococcus sp. BL107	159	CCA-GTG	2	18	1	(CCA)3-(GTG)3	coding
Parasynechococcus sp. BL107	160	A-A	2	12	7	(A)6-(A)6	noncoding
Parasynechococcus sp. BL107	161	GC-CA	2	16	9	(GC)4-(CA)4	coding
Parasynechococcus sp. BL107	162	CA-TCA	2	15	2	(CA)3-(TCA)3	coding
Parasynechococcus sp. BL107	163	CT-GA	2	12	3	(CT)3-(GA)3	coding
Parasynechococcus sp. BL107	164	CG-T-A	3	18	9	(CG)3-(T)6-(A)6	noncoding
Parasynechococcus sp. BL107	165	GCC-C-AC	3	21	15	(GCC)3-(C)6-(AC)3	coding
Parasynechococcus sp. BL107	166	TC-GA	2	12	0	(TC)3-(GA)3	coding
Parasynechococcus sp. BL107	167	TGA-GC	2	15	5	(TGA)3-(GC)3	coding
Parasynechococcus sp. BL107	168	GC-CG	2	12	0	(GC)3-(CG)3	coding
Parasynechococcus sp. BL107	169	G-C	2	13	6	(G)6-(C)7	coding
Parasynechococcus sp. BL107	170	C-CA	2	12	3	(C)6-(CA)3	coding
Parasynechococcus sp. BL107	171	AT-A	2	12	2	(AT)3-(A)6	coding
Parasynechococcus sp. BL107	172	AT-A	2	12	6	(AT)3-(A)6	coding
Parasynechococcus sp. BL107	173	CT-T	2	12	8	(CT)3-(T)6	coding
Parasynechococcus sp. BL107	174	AC-AT	2	12	6	(AC)3-(AT)3	noncoding
Parasynechococcus sp. BL107	175	A-T	2	12	2	(A)6-(T)6	noncoding
Parasynechococcus sp. BL107	176	AG-T	2	12	1	(AG)3-(T)6	noncoding
Parasynechococcus sp. BL107	177	G-AAC	2	15	1	(G)6-(AAC)3	coding
Parasynechococcus sp. BL107	178	AT-CCA	2	15	2	(AT)3-(CCA)3	coding
Parasynechococcus sp. BL107	179	GA-A	2	12	7	(GA)3-(A)6	noncoding
Parasynechococcus sp. BL107	180	GT-GCC	2	15	7	(GT)3-(GCC)3	coding
Parasynechococcus sp. BL107	181	GA-CG	2	12	10	(GA)3-(CG)3	coding
Parasynechococcus sp. BL107	182	A-A	2	12	1	(A)6-(A)6	noncoding
Parasynechococcus sp. BL107	183	AT-AT	2	12	5	(AT)3-(AT)3	noncoding
Parasynechococcus sp. BL107	184	A-A	2	12	6	(A)6-(A)6	noncoding
Parasynechococcus sp. BL107	185	C-GC	2	12	3	(C)6-(GC)3	coding
Parasynechococcus sp. BL107	186	GC-CAG	2	15	1	(GC)3-(CAG)3	coding
Parasynechococcus sp. BL107	187	T-GC	2	12	1	(T)6-(GC)3	coding
Parasynechococcus sp. BL107	188	TA-A	2	14	1	(TA)3-(A)8	noncoding
Parasynechococcus sp. BL107	189	AG-TC	2	12	6	(AG)3-(TC)3	noncoding
Parasynechococcus sp. BL107	190	GGT-T	2	15	0	(GGT)3-(T)6	noncoding
Parasynechococcus sp. BL107	191	A-A	2	12	8	(A)6-(A)6	noncoding
[truncated: 9,084 more rows]

## Sheet: Table S5
Table S5 Unique motifs of CSSR identified in genomes of 54 Parasynechococcus-like strains
Synechococcus sp. RS9907	Synechococcus sp. RS9902	Synechococcus sp. N26	Synechococcus sp. M16.1	Synechococcus sp. A15-44	Synechococcus sp. A15-62	Parasynechococcus sp. WH 8109	Synechococcus sp. UW86	Synechococcus sp. MU1617	Parasynechococcus sp. CC9902	Parasynechococcus sp. BL107	Synechococcus sp. UW69	Synechococcus sp. MU1611	Synechococcus sp. PROS-U-1	Synechococcus sp. KORDI-52	Parasynechococcus marenigrum WH8102	Synechococcus sp. A15-24	Synechococcus sp. A18-46.1	Synechococcus sp. A15-28	Synechococcus sp. BOUM118	Synechococcus sp. YX04-3	Synechococcus sp. A18-40	Synechococcus sp. WH 8103	Synechococcus sp. RS9915	Synechococcus sp. A15-127	Synechococcus sp. KORDI-49	Synechococcus sp. BS55D	Synechococcus sp. BS56D	Synechococcus sp. HK01-R	Synechococcus sp. RS9909	Synechococcus sp. WH 8101	Synechococcus sp. UW105	Synechococcus sp. UW140	Parasynechococcus sp. CC9311	Synechococcus sp. WH 8020	Synechococcus sp. PROS-9-1	Synechococcus sp. MVIR-18-1	Synechococcus sp. SYN20	Synechococcus sp. ROS8604	Parasynechococcus sp. WH 8016	Synechococcus sp. NOUM97013	Synechococcus sp. A18-25c	Synechococcus sp. A15-60	Synechococcus sp. PROS-7-1	Synechococcus sp. MEDNS5	Parasynechococcus sp. WH 7803	Synechococcus sp. BMK-MC-1	Synechococcus sp. MIT S9504	Synechococcus sp. MIT S9509	Synechococcus sp. BIOS-E4-1
GGT-CGG-GGC	T-T-GT	AT-GAC	CTC-CA	AGG-T	TG-GCC	T-GTG	CGG-CTG	TGT-CG	GGC-CGG	TTG-GCT	GGT-TG	AAG-AT	C-AGA	T-T-GCT	GA-A-TA	TGGC-CGG-G	AT-C	G-CGC	GTT-AT	ACA-CCG	TGC-GC-GC	C-TTC	ATC-TCG	T-GC-CCT	TTC-GT	GTTT-CT	T-G-G	TTG-CTG	TGGT-G	TC-TC-CACT	GAC-CCA	TG-GT-CTG	TGA-CCT	T-CTC	TC-TGT	T-T-T-T-T-T-T-T-T	TC-TTC	A-AAGC	TCT-CG	A-CA-GT	TG-CGC	AG-A-A	A-TTA	TG-CCA	T-GTG-C-GT	GGT-CGC	ATA-A	TGGG-GT	ACT-T
TGCT-T	GC-ACG	CCT-G	C-GGC-GGC-GGC	GGT-GCC	TC-CCCAA	GGT-GGC-GGC-GGCGGT	CGG-TGG-CGG-GGTGGC-GGT	T-A-G-C	CGT-T	T-TGA-T	CA-TGG	T-GA-G	AC-A-T	TTC-TGC	A-G-C-TC	TG-GA-GT	TA-TTC	TGG-CGC	GC-GCA-G	TG-TATC	G-T-T	CGA-GGC	AGA-G	GTC-GC	TG-CCT	GT-TCGGC	TGC-GTG	TG-CATGTG	TCGTCC-TC	TC-TC-CA	AG-ACG	TGG-GTT	GAA-AG	TCT-TG	TC-GGTT	TCG-TGT	CCG-AC	CTA-A	TC-ATG	ACC-G	GA-AAAT	GGC-GGC-GGC-GGC-GGC	GAA-TA	T-AGA	TGCTGG-GC	GC-AAG-A	A-AGC	T-ATC	AAG-T
AGC-AAG	T-AC-T	AGGCCA-GCT	AG-TGGA	GTT-ATA	GTT-G	GGTGCT-GCT	TAT-A	GT-TA-A	T-CTT	TGT-AGA	GTG-TG	CGG-GGC-CGG-TGG	CCA-AGC	TGG-CGCCC		TCA-CT	GT-GT-GA	CCT-AC	CCA-GA	CTC-GCT	G-TGC-G	C-CA-GA	GGT-GGC-GGC-GGC-GGT	GT-CCT	TGC-CGG	GCT-TG	TGC-CCG	TGA-GGC	TC-GCC	TC-GC-CGT	CAT-CA	TGG-GCA	ACG-C	GC-TG-GCT	TC-CTT	TA-CTG	GC-GC-CCAA	T-TG-CT	TAC-AT	ACG-GCT	ATT-CT	GGT-GCG	ACC-GC-GGT	GTG-G-T	TC-CAC	GTT-GTT	CGG-GT	GTG-CAG	AG-GGCT
GTT-CGC	GTA-TAC	CG-GGA-CG	CTA-CA	TGGA-GAAGG	G-T-TC	GAAATG-GAC	GTT-AGC	GGC-TGC-T	GA-TC-T	TCG-A	TA-TCA	G-GGC-ACA	ACCA-AG	TGCT-C		T-AT-TA		TGGC-GGC-G		CG-CGC	GCC-GCA-C	AGA-A	GCC-AGC-C	GCG-AG	TGA-AT	GCT-GGC-TC	TC-TCTA	TG-AG-GAT	TC-CGC	G-GC-C	GGT-TGT	TC-GTG-CT-GAG	GCC-CCG-GCC-CCG-GCC	CT-C-T	TCC-TCT	GTG-GCC	ATG-TC	TTC-GCA	G-TC-GACCAC	AGC-GGT	AGG-CT	CCTGAA-CCTGAA	GTC-GA	GTC-T	GCC-CTG	GTC-TGT	C-C-C-C-C	GTGAA-T	GA-CGG
AC-GGA	GGATC-C	G-T-TA	GTC-GTG-GT	GGC-CGA	GTT-C	CT-A-T		GC-TCC	GGT-AC	TC-AAT	GAA-AAC	CCA-TC	G-AGA	TCGGC-C-C		GTG-CGT		ACG-AG		TC-CT-TC	CCA-GTC			GCCT-G	TCT-AC	G-CTG-A	TC-GGT-CT	TC-G-CT	T-AAT	GCT-C-GA	CT-AG-CAC-AG	TCC-CT-CT	TGC-TGAA-CA	GA-GTT	TCC-CCT	GC-GCTC	TC-TTG	C-ATG	GTAT-G	AG-TC-T		CCG-CT	TCTTC-TC	GTC-CA	GAT-TC	GC-TG-GTG	GC-ATG	GTC-A	CACCAA-AAACAA
CTT-GA	CA-GGC	AG-GA-AGC		TCC-TC	GGC-CCA	C-G-T-TC		GC-TA	AG-GA-GT	GT-TA	A-CT-TC	CAG-CA	GAT-GGT	TCG-AGG		GGTTCC-TCAGGC		CTC-G		CAACAC-CGACAC	C-CA-C			GCC-GCCG	T-CGT	GCC-TGG	GTG-ACC	TC-ACC	GTG-TC	GCG-TGC-TGG	TGA-CGG-A	TA-TC	GTA-C	TTG-T-T	G-TGC-CGG	GC-AG-TC	A-AT-C	GA-AG-A	GT-AAC-GC	CAA-GTG		TC-CT-GCT	GCT-CA	GGT-CCA	GA-G-GC	GGC-TGG	TG-ACC	CTG-A-GCC	TC-GTT
TCA-TGA	A-ATA	C-GGC-GGC-CGG		CGC-AGC	GC-CG-GGC	CCGA-GA		GAC-GGT	TTG-A	GT-GCC	T-A-GT	GCC-AG	TG-CTT	T-A-T-GT		GCC-CGC		GT-CAG-G		CCG-CTG	ACCACG-CCATGA			CTG-TGA	GTGGTC-GTGGTC	CGG-A	GGC-CAG-TC	GGT-TGA	GT-CGG	GCC-G-GC	GAA-A	GGT-GAG	TTC-CTCTTC	AT-GA-GA	GC-TGT	GATC-CT	TCA-TG	AAC-GC	GGT-GA	CA-CCA		CAC-GGTT	GCA-AG-AG	GC-TGG-TC	CGG-TGG	AT-CG	CCG-T	CG-G-G	CAC-CAT
AG-AAG	TGG-AGC	CT-CAC		CGC-GA	CG-TCT	ATCC-AG		GA-A-C	GGA-C	GT-CAC	GGC-AGC	TC-G-G	TCC-TA	T-AGAC		CTT-GC		AGG-CAG		ACC-GCC-ACC				CGT-CTG	GTGATC-GTGGTC	CGC-GT	G-GCA-C	G-GTG-G	GGT-GC-G	GC-CCGG	T-CGC	GCT-GT-GCT	ACA-GA-A	ATT-A	GC-GCGCG	GA-CTA	TA-T-AT	TTA-TTA	GCC-AC	C-ACCC		AG-AGG	CAG-GT	GCC-GTT	CAT-GGC	CTG-AGC	C-C-C	CG-AC-GC	T-TG-AT
CTC-T	C-AGC-CAG	ACA-CG		T-T-CT	C-GGC-GGC-GGT	AC-AGT		C-GGT-CGG	GC-TCA	GCT-T-TCG	T-A-GA	TG-AAG	CACGAT-CAC	GT-TGT		CG-CCT		CTC-C		AT-AAT				CGG-TGG-CGG-TGG	G-G-G-G-G	CG-A-TG	GC-GTC	GCTG-A	GGT-ACC	GAG-TG-GTG	AGGC-ACG	GCG-TGA	CT-AAC	CG-ACC	GCC-CCG-GCC	CT-TTG	A-TAC	G-CT-G	GC-CAA	CAG-AC		GGT-GGC	CG-TGC	GC-AGC-CCT	CAG-ACA	GC-CCA-GT	G-AG-AT	CA-TCAC	AGCA-TGA
AG-CGG	C-GTT	CA-CGC		CTG-TGC-G	C-GC-GCC-CTG			CAC-T	T-A-GC	GC-TCA-T	AG-A-T-TG	ATC-T	AAT-T	GTG-T-GTG		CGA-GCC		CCT-CG		CAC-GC-CGG				CG-CG-GCC	GGCGGT-GGT	CAT-CAA	GAT-TG	GCG-GCC	GGC-CG-GC	GAAT-ATC	C-CGGTGG	GCC-GGT	TC-GTC	G-ATG	GC-ACT	CT-TG-TA	TC-ATA-GCA	TA-AC	GAT-AC	CCGG-CG		GA-GC-CCA	CA-GAC	GA-GCT-AC	ATC-TC	CGT-GA	CG-TAC	CA-A-T	ATT-AT
CCG-CA	A-GATC	CGC-CAG		GGC-CAC	CAG-GGC			CAA-CAG	A-TACT	GCC-C-AC	ACA-GA	TTG-TCA	TC-GGC	GTC-TC		CAGC-GTT		TA-TG		GAC-TGG				CCG-GCT	GGC-CGG-GGC-CGG-TGG-CGG-TGG-CGG	ATA-G	GAG-G-TC	GCC-ACC	GCG-TG	GAA-ACG	GGCGGT-GGCGGT	GAT-G	TCG-GCG	TC-T-T	GAC-AG	CTC-TTC	TTTA-T	GA-TTGT	CT-AG-T	CGAT-CG		GA-GAGCA	CCAA-C-AG-CAG	GA-G-C-T	A-GAG	GAG-C	G-CT-C	ATG-A	A-T-A
CGA-GAC	TCG-ACC	GTT-TGC			CAC-AAG			AT-TTC-A	CCA-TGG	G-C-A	AAG-AAC	TTC-CGA	ATA-T	GGAGA-GAGGA		CA-AT-G		TCG-GTG		ATC-CAA				C-CCT	GCAG-AC	AG-TCA	CTG-C-T	CT-T-CA	GCG-GCT-TGG	CT-GGT	GC-TC-GA	GATACC-GATACG	TTC-AG	AATC-AG	GAA-AT	CGT-CG	TCC-CAC	A-CAAA	C-CGT-CGG	CGC-AG		GA-A-A	CAT-CCA	GAG-C-CGA		T-AAC	TGG-GGT-T		TAA-CT
	CCG-GGC	CT-GT-GT-GC			AGC-CTG			AT-GT	TATT-AC	GA-T-TC	AG-GA-T	G-T-TG	GCT-C-GGA	G-CTT		AT-AG-TA		T-AC-CA		CT-GAC				CCA-C-CG-GC	GAG-GC	AC-AC-AC	CT-GC-CG	CTG-CTG-CTG	GC-GGCCT	C-TGGC	CTC-CCA	GAG-GGA	CGG-CA	A-ATC	GAA-ACC	CGC-GCT		GTAGGA-GCAGGA	C-C-AC	CG-CAG-CTG			AGC-GAC	GAC-CAA		GCC-TC	ACC-T-AC		TCA-CCA
	AT-GAG				A-CT-A			AG-AGA	T-CTGGG	CG-T-A	AAC-AG	CT-TCGTC-TCATC	TGA-CG	GCT-CCG		AGG-GCC		A-CT-AG		CAA-TC				CAG-CT-GCC	CT-CGG		CT-AC-G	CG-GC-AG	GC-GCA-GCCA	CGC-CG-GC	TCA-CGC	GA-GA-T	A-AATA	CGC-TGC	C-TTG	CA-GT-GC		GA-AGG	CAT-GCC	C-G-GCT			AGA-GAA	GA-ACG			CT-CCAA		T-GCT-TG-C
	TGC-TCG								ATT-AAT	CGC-AC	T-AACC	ACA-GC	AC-TCA	GCG-GGC		AG-GCT-ACC		CGG-CCA		C-C-GT				CA-CCT	CT-AAG		CGA-CGG	CCG-TG-GC	GCC-CCG-CCG-GCC-ACC-CG	CGC-CAC	TG-T-CA	CT-TCG	ATG-G	ACC-C	CT-TCT	A-AC-AG		TCT-A	CAC-ACA	G-AAG			CCT-C	CTC-GC			AC-CCCA		ATA-AT
	GA-GATC-T								CAA-AT	CCA-GTT-AGC	TTC-GA	TG-TTG	GTC-CCA	GCGGC-GTG		AG-GC-GCC-GCG		AT-TG		AG-CTT				CA-A-C-G	CGG-GGC-CGG-GGC-GGC		CCTC-A-AC	CAG-GTC	GC-CAG-G	CCT-GGC	GGT-CTC	CT-GTT	A-T-CT	ACC-GAC	CTT-CG			GAC-GA	CAA-CCA	GC-ACA				CGGA-G			GT-GGA		C-TA-A
	TTG-G								TGG-TGA	CCA-GTG		AGCAA-A	CAA-CGA-GCT	GC-AGA		ACC-GA		GC-GAG		CAC-T-AC				AG-AAC-ATC	CG-CG-GCC-GC		ATC-ACC	ACG-CG	GCA-CG-GGC	CCT-GC	GCC-AGC	CT-CGT	GTC-AC	CG-GC-TC	CT-TCA			A-CT-GA	CA-A-CAA	GCA-TGC				CGCC-T			TGT-TA		ATGACC-ATGGCC
									TCT-AT	CCAC-AAC-T			GTT-GTG	GCA-CCTTGG				AC-G-CGT		CCG-ACC				A-AGG	C-CG-GC		AGC-GTG	A-ATT	CT-GCT-T	CAC-CAC	CT-T-CT	C-GGA	AGA-AT	CAAG-TC-A	CTG-ACC			A-ATG	CA-AAC	GCCG-CGT				CCAA-C			CAA-CGA		G-GATC
									GT-CA-G	CAT-T			AT-ATCA	GATTCC-GATTCC-GATTCC				AGC-GCA		CGT-GCC					CAT-CT				CG-CGG	A-TGAC	GCGGC-CCA	CGC-TCA		CAT-CAT	CT-AGG			GT-CGT	A-TA-A	GC-GGT-GAC-CG				CAGG-GC			GA-CTTG		TGT-A
									A-TGA-GC	CA-TCA			AC-GT-G-A	GAC-A				CGA-GTT		CGC-CTG					CAC-A				CGC-CGC-CCA	AG-TTG	AT-TGC	CCG-GGA		GGA-TCT	CGG-CGG-CGG-CGG			TG-TGT	AG-T-A-TA-C	GCT-TCG				ATTT-A			TA-GT		GGC-A
									CGA-T	CAA-CG			C-TC-CAG	CT-CT-GT				GTC-TGGC							CA-AGG				C-GCA-CAG	AG-ACA	GA-G-G	CCA-GGA		GA-CT-GT	CAA-GAA			GA-TC-GCT	AC-TGC	GTC-CAC				ATC-CT			TC-AGG		AG-TC-GCT
									GTG-A	AT-CCA			GAG-GAG	CCG-ATC				CAG-AG-CAG							ATTG-G				C-C-GCT	AGA-CA	CGG-GCC-CG	CCAA-ACA		AT-TTCA	CAA-G			GGA-A	ACT-G	GT-GCG				AC-CG-CT					GT-TCA
									A-AC-TCA	ACT-GC			A-ACA-T	CCA-T-AG				CCG-CCG-CCG							ACG-GT				CCG-CCG-AG	AC-TGA-T	CAG-C-CG	CA-CAA		CA-AC-GA	CAA-ACA				AAG-T-TAA	GT-GT-G				ACCG-CGAC					CT-CAG-GCT
									G-AGCA	AC-GTT			CGG-TGG-CGG-TGG-CGG	A-TA-CA				GGA-GC							A-CG-GAC				CCA-GGT		GT-CTG	AGG-CAC		TAA-AC	AT-ATT					GT-GTTG				ACA-GGT					TA-T-TA
										AC-CT-CGT			C-GTC	ACG-TGC											ACC-CTG-ATG				CAG-ACC		AC-CTG	AG-CAT		GGT-CGG-TGG	AGG-GT					TGC-AGC				ACA-C					AG-GCCA
										AC-AT			TGC-GCG	ACA-G											AC-CAT				C-AAG		GGC-AGG	AGC-ACC		GAG-TTG	AG-ATC														TC-TG-TGG
										AAC-AT			AG-TGA																CA-ACC		CT-ACC	ACC-CCACCG		AC-AG-TG	A-CA-T														CA-ACA
										A-AAG-CAC			GCT-GT																AG-AC-GC		AGA-AG	AAC-ACC		TCC-A															CAG-T-CAG
													GCCACC-TCA																ACC-CCA		CT-TGT			AT-CA															GCTA-CT
																															GA-TG-TA			TC-AG-TA															ATGGAT-ATGGAC
																															TG-TG-TG-TG			GT-CT-CG															G-GTT
																															GAACA-CAGAT			T-TCA															TTG-AAC
																															GAT-CT																		GTG-CGG-TGG-CGG
																															GTG-TCC																		C-TA
																															GTG-T																		AC-AT-T
																																																	TA-C
																																																	A-AG-A
																																																	AGA-GCT
																																																	AGG-CAAT
																																																	TC-GGA-TGA
																																																	TA-AG-AGT
																																																	GAC-TGA
[truncated: 4 more columns]
